# Supplementary material for: Dorsal raphe nucleus to anterior cingulate cortex 5-HTergic neural circuit modulates consolation and sociability
Source: eLife. 2021 Jun 3;10:e67638. doi: 10.7554/eLife.67638 (PMC8213405; doi:10.7554/eLife.67638)
Supplement: Figure 1—figure supplement 4—source data 1. [file elife-67638-fig1-figsupp4-data1.xls]

## Sheet: Figure_1_Supplemental_4A
	Time percent in chasing
	Animals	Male_Dio	Male_ChR2	Female_Dio	Female_ChR2
	1#	2.452	5.942	4.984	6.135
	2#	7.124	5.37	3.425	5.357
	3#	3.29	3.467	5.919	7.001
	4#	5.167	3.836	7.087	6.054
	5#	6.344	5.237	4.117	4.319
	6#	6.915	4.625	5.789	3.257
	7#	3.962	4.381	6.175	7.413
	8#	5.624	6.728	7.201	3.558

## Sheet: Figure_1_Supplemental_4B
	Time percent in chasing
	Animals	Male_Dio	Male_eNPHR3.0	Female_Dio	Female_eNPHR3.0
	1#	2.357	0.961	4.213	1.624
	2#	3.524	0.557	7.358	0.869
	3#	5.756	0.498	4.897	0
	4#	6.092	0.249	6.931	0.942
	5#	7.148	0	8.174	0
	6#	6.773	0.437	6.273	0.837
	7#	6.586	0	3.993	0.643
	8#	5.233	1.17	5.107	0.398

## Sheet: Figure_1_Supplemental_4C
	Time percent in grooming
	Animals	Male_Dio	Male_ChR2	Female_Dio	Female_ChR2
	1#	5.73	3.301	6.496	3.39
	2#	4.002	2.143	1.008	4.24
	3#	3.054	4.126	4.766	5.315
	4#	4.411	7.268	6.134	7.013
	5#	4.184	8.514	4.672	7.19
	6#	6.864	5.692	6.585	3.324
	7#	3.339	4.187	3.082	6.118
	8#	8.41	5.665	3.057	7.173

## Sheet: Figure_1_Supplemental_4D
		Time percent in grooming
		Animals	Male_Dio	Male_eNPHR3.0	Female_Dio	Female_eNPHR3.0
		1#	3.067	2.557	4.338	1.51
		2#	4.136	4.158	1.38	5.588
		3#	5.086	5.624	4.918	7.695
		4#	6.183	6.023	3.87	4.507
		5#	6.684	5.297	5.611	6.119
		6#	4.758	3.399	5.714	3.784
		7#	3.609	3.047	4.035	6.373
		8#	5.853	6.642	5.36	7.574

## Sheet: Figure_1_Supplemental_4E
	Male_Dio_Total Distance travelled				Male_ChR2_Total Distance travelled				Female_Dio_Total Distance travelled				Female_ChR2_Total Distance travelled
	Animals	OFF	ON		Animals	OFF	ON		Animals	OFF	ON		Animals	OFF	ON
	1#	2185.86	3862.84		1#	2969.69	2882.07		1#	2845.11	4011.77		1#	2778.4	2402.65
	2#	2661.7	1389.11		2#	2769.58	2272.9		2#	2876.38	3899.29		2#	2350.35	3862.84
	3#	2109.59	2049.86		3#	3523.82	2504.37		3#	3421.61	2391.08		3#	2910.82	2089.56
	4#	2684.88	2778.4		4#	3632.6	3475.86		4#	2595.15	2272.9		4#	1770.14	2364.9
	5#	2118.94	2854.98		5#	1707.57	1896.4		5#	3261.06	2501.51		5#	4329.99	4743.05
	6#	3618.67	3371.27		6#	2899.95	1844.73		6#	3297.71	4007.62		6#	2166.27	1436.35
	7#	2185.86	3421.61		7#	3289.17	2287.78		7#	2899.95	1844.73		7#	1232.2	1785.77
	8#	2596.3	1882.07		8#	2101.7	2364.9		8#	2287.78	3289.17		8#	1684.88	1223.4

## Sheet: Figure_1_Supplemental_4F
	Male_Dio_Total Distance travelled				Male_eNPHR3.0_Total Distance travelled				Female_Dio_Total Distance travelled				Female_eNPHR3.0_Total Distance travelled
	Animals	OFF	ON		Animals	OFF	ON		Animals	OFF	ON		Animals	OFF	ON
	1#	3064.95	2882.07		1#	2512.66	2331.16		1#	3103.98	2109.59		1#	1754.93	2661.7
	2#	1721.7	2272.9		2#	2225.96	1754.93		2#	2137.64	3090.01		2#	2578.51	2109.59
	3#	1831.33	1404.34		3#	2812.5	2711.26		3#	2847.39	3488.89		3#	3996.7	3599.1
	4#	1479.34	2448.74		4#	2395.22	1139.84		4#	1912.52	1909.78		4#	1769.68	1269.99
	5#	2464.27	3777.45		5#	3297.71	4007.62		5#	1844.62	1248.85		5#	1999.54	1410.29
	6#	3977.56	4586.39		6#	2329.99	2166.27		6#	2955.14	2006.1		6#	1597.38	1308.42
	7#	1584.92	1026.93		7#	1743.05	1436.35		7#	2776.88	3504.63		7#	2209.32	2450.15
					8#	2785.77	2232.2		8#	1490.07	1817.55		8#	2518.58	2198.25

## Sheet: Figure_1_Supplemental_5
	Animals	Allogrooming_time	Allogrooming_Frequency		Chasing_time	Chasing_Frequency
	Male_eNPHR3_on_1	0.87	1		0.96	2
	Male_eNPHR3_on_2	3.25	1		0.56	1
	Male_eNPHR3_on_3	1.27	2		0.5	1
	Male_eNPHR3_on_4	0	0		0.25	1
	Male_eNPHR3_on_5	0.42	1		0	0
	Male_eNPHR3_on_6	0	0		0.44	1
	Male_eNPHR3_on_7	0.63	1		0	0
	Male_eNPHR3_on_8	0.85	1		1.17	2
	Male_eNPHR3_Off_1	5.822	6		3.205	7
	Male_eNPHR3_Off_2	7.577	7		5.418	5
	Male_eNPHR3_Off_3	4.02	4		7.511	7
	Male_eNPHR3_Off_4	5.014	5		6.124	6
	Male_eNPHR3_Off_5	3.592	6		2.919	3
	Male_eNPHR3_Off_6	5.846	8		3.559	3
	Male_eNPHR3_Off_7	4.982	5		7.683	6
	Male_eNPHR3_Off_8	6.402	8		3.798	4
	Female_eNPHR_on_1	2.79	1		1.62	2
	Female_eNPHR_on_2	1.01	1		0.87	1
	Female_eNPHR_on_3	0	0		0	0
	Female_eNPHR_on_4	0.7	1		0.94	1
	Female_eNPHR_on_5	0.52	1		0	0
	Female_eNPHR_on_6	1.56	2		0.84	1
	Female_eNPHR_on_7	0.42	1		0.64	1
	Female_eNPHR_on_8	0.58	1		0.4	1
	Female_eNPHR3_off_1	4.305	4		4.832	4
	Female_eNPHR3_off_2	7.132	7		3.367	5
	Female_eNPHR3_off_3	6.501	6		5.879	7
	Female_eNPHR3_off_4	4.189	5		3.672	6
	Female_eNPHR3_off_5	5.802	6		5.681	5
	Female_eNPHR3_off_6	6.735	5		5.826	8
	Female_eNPHR3_off_7	6.181	6		7.935	9
	Female_eNPHR3_off_8	3.541	4		6.859	7
