# Supplementary material for: Dorsal raphe nucleus to anterior cingulate cortex 5-HTergic neural circuit modulates consolation and sociability
Source: eLife. 2021 Jun 3;10:e67638. doi: 10.7554/eLife.67638 (PMC8213405; doi:10.7554/eLife.67638)
Supplement: Figure 1—figure supplement 5—source data 1. [file elife-67638-fig1-figsupp5-data1.xls]

## Sheet: Figure_1_Supplemental_5
	Animals	Allogrooming_time_percent	Allogrooming_Frequency		Chasing_time_percent	Chasing_Frequency
		(A)	(B)		(C)	(D)
	Male_eNPHR3_on_1	0.87	1		0.96	2
	Male_eNPHR3_on_2	3.25	1		0.56	1
	Male_eNPHR3_on_3	1.27	2		0.5	1
	Male_eNPHR3_on_4	0	0		0.25	1
	Male_eNPHR3_on_5	0.42	1		0	0
	Male_eNPHR3_on_6	0	0		0.44	1
	Male_eNPHR3_on_7	0.63	1		0	0
	Male_eNPHR3_on_8	0.85	1		1.17	2
	Male_eNPHR3_Off_1	5.822	6		3.205	7
	Male_eNPHR3_Off_2	7.577	7		5.418	5
	Male_eNPHR3_Off_3	4.02	4		7.511	7
	Male_eNPHR3_Off_4	5.014	5		6.124	6
	Male_eNPHR3_Off_5	3.592	6		2.919	3
	Male_eNPHR3_Off_6	5.846	8		3.559	3
	Male_eNPHR3_Off_7	4.982	5		7.683	6
	Male_eNPHR3_Off_8	6.402	8		3.798	4
	Female_eNPHR_on_1	2.79	1		1.62	2
	Female_eNPHR_on_2	1.01	1		0.87	1
	Female_eNPHR_on_3	0	0		0	0
	Female_eNPHR_on_4	0.7	1		0.94	1
	Female_eNPHR_on_5	0.52	1		0	0
	Female_eNPHR_on_6	1.56	2		0.84	1
	Female_eNPHR_on_7	0.42	1		0.64	1
	Female_eNPHR_on_8	0.58	1		0.4	1
	Female_eNPHR3_off_1	4.305	4		4.832	4
	Female_eNPHR3_off_2	7.132	7		3.367	5
	Female_eNPHR3_off_3	6.501	6		5.879	7
	Female_eNPHR3_off_4	4.189	5		3.672	6
	Female_eNPHR3_off_5	5.802	6		5.681	5
	Female_eNPHR3_off_6	6.735	5		5.826	8
	Female_eNPHR3_off_7	6.181	6		7.935	9
	Female_eNPHR3_off_8	3.541	4		6.859	7
