# Supplementary material for: Dorsal raphe nucleus to anterior cingulate cortex 5-HTergic neural circuit modulates consolation and sociability
Source: eLife. 2021 Jun 3;10:e67638. doi: 10.7554/eLife.67638 (PMC8213405; doi:10.7554/eLife.67638)
Supplement: Figure 1—source data 1. [file elife-67638-fig1-data1.xls]

## Sheet: Figure 1G
Time percent in allogrooming
Animals	Male_Dio	Male_ChR2	Female_Dio	Female_ChR2
1#	7.404	7.12	6.001	5.143
2#	6.179	4.125	3.285	7.473
3#	8.697	9.203	5.544	7.141
4#	4.594	4.236	6.767	2.998
5#	6.563	5.519	4.662	6.543
6#	6.918	6.343	3.427	6.111
7#	4.842	3.411	7.907	3.201
8#	3.947	6.794	3.942	4.795

## Sheet: Figure 1H
Time percent in allogrooming
Animals	Male_Dio	Male_eNPHR3.0	Female_Dio	Female_eNPHR3.0
1#	7.473	0.873	9.134	2.786
2#	6.982	3.247	7.12	1.008
3#	6.831	1.267	5.203	0
4#	5.153	0	4.083	0.697
5#	6.457	0.423	3.156	0.517
6#	2.358	0	6.672	1.564
7#	7.086	0.627	6.171	0.417
8#	8.191	0.849	4.209	0.582

## Sheet: Figure 1I
Male_Dio				Male_ChR2				Female_Dio				Female_ChR2
Animals	OFF	ON		Animals	OFF	ON		Animals	OFF	ON		Animals	OFF	ON
1#	0.24954	0.11212		1#	0.35158	0.23102		1#	0.218	0.20411		1#	0.48212	0.27532
2#	0.1562	0.23276		2#	0.1185	0.19941		2#	0.2969	0.17769		2#	0.41846	0.48598
3#	0.10043	0.13705		3#	0.43408	0.42159		3#	0.21813	0.37226		3#	0.17028	0.40816
4#	0.35261	0.41161		4#	0.46346	0.40953		4#	0.46339	0.2379		4#	0.46133	0.30184
5#	0.32293	0.43982		5#	0.28344	0.49307		5#	0.19463	0.15904		5#	0.38987	0.40912
6#	0.30725	0.19007		6#	0.43624	0.47923		6#	0.31448	0.4756		6#	0.15541	0.3268
7#	0.16607	0.33196		7#	0.18258	0.29542		7#	0.44055	0.3141		7#	0.34638	0.23252
8#	0.31399	0.1701						8#	0.31121	0.23109

## Sheet: Figure 1J
Male_Dio				Male_eNPHR3.0				Female_Dio				Female_eNPHR3.0
Animals	OFF	ON		Animals	OFF	ON		Animals	OFF	ON		Animals	OFF	ON
1#	0.08063	0.1323		1#	0.15789	0.06566		1#	0.13615	0.17621		1#	0.20757	0.0508
2#	0.16191	0.21334		2#	0.13965	-0.06351		2#	0.09971	0.20154		2#	0.15161	-0.04422
3#	0.13387	0.11011		3#	0.2631	-0.12515		3#	0.10465	0.14944		3#	0.15133	0.04531
4#	0.39391	0.43256		4#	0.35178	0.08515		4#	0.31027	0.24856		4#	0.28936	-0.01258
5#	0.17087	0.26159		5#	0.26799	0.12514		5#	0.40141	0.36989		5#	0.22403	0.06286
6#	0.442	0.38398		6#	0.38597	-0.01631		6#	0.27834	0.1909		6#	0.23796	0.00893
7#	0.41976	0.24473		7#	0.39528	0.0099		7#	0.17791	0.20958		7#	0.19176	-0.07279
8#	0.30629	0.2188		8#	0.34618	0.10797		8#	0.14648	0.26001		8#	0.15185	0.04319

## Sheet: Figure 1K
	Male_Dio_Central Area Time Percent				Male_ChR2_Central Area Time Percent				Female_Dio_Central Area Time_Percent				Female_ChR2_Central Area Time_Percent
	Animals	OFF	ON		Animals	OFF	ON		Animals	OFF	ON		Animals	OFF	ON
	1#	13.28	10.23		1#	12.75	10.49		1#	11.59	12.18		1#	18.2	15.21
	2#	19.5	13.3		2#	11.93	7.15		2#	18.81	16.62		2#	22.8	19.23
	3#	6.74	17.66		3#	19.53	8.42		3#	7.47	15.35		3#	27.85	24.85
	4#	14.34	18.19		4#	14.37	12.39		4#	14.08	17.13		4#	19.15	13.75
	5#	11.05	9.11		5#	12.65	14.26		5#	17.06	23.08		5#	6.09	7.78
	6#	21.44	27.99		6#	21.55	17.26		6#	12.02	13.11		6#	27.73	25.52
	7#	19.57	23.14		7#	22.74	29.16		7#	21.55	17.26		7#	13.95	11.93
	8#	16.46	10.54		8#	28.21	13.75		8#	22.74	29.16		8#	14.34	23.78

## Sheet: Figure 1L
	Male_Dio_Central Area Time_Percent				Male_eNPHR3.0_Central Area Time_Percent				Female_Dio_Central Area Time_Percent				Female_eNPHR3.0_Central Area Time_Percent
	Animals	OFF	ON		Animals	OFF	ON		Animals	OFF	ON		Animals	OFF	ON
	1#	18.82	15.07		1#	15.61	8.39		1#	7.41	6.74		1#	10.35	18.51
	2#	13.26	18.69		2#	14.85	15.29		2#	13.32	15.42		2#	15.87	6.74
	3#	10.94	19.61		3#	18.43	12.69		3#	17.73	10.23		3#	22.9	21.95
	4#	16.69	9.09		4#	17.9	9.77		4#	17.26	32.27		4#	12.72	10.16
	5#	27.43	17.73		5#	12.02	13.11		5#	5.55	11.8		5#	11.18	8.98
	6#	28.31	25.55		6#	6.09	17.73		6#	8.28	10.62		6#	17.73	18.32
	7#	14.93	13.96		7#	15.52	7.78		7#	21.57	26.65		7#	22.84	17.2
					8#	13.95	11.93		8#	5.47	13.81		8#	28.13	27.58
