# Supplementary material for: Dorsal raphe nucleus to anterior cingulate cortex 5-HTergic neural circuit modulates consolation and sociability
Source: eLife. 2021 Jun 3;10:e67638. doi: 10.7554/eLife.67638 (PMC8213405; doi:10.7554/eLife.67638)
Supplement: Figure 2—figure supplement 1—source data 1. [file elife-67638-fig2-figsupp1-data1.xls]

## Sheet: Figure 2_Supple_1A
	Time percent in chasing
	Animals	Male_Dio	Male_ChR2	Female_Dio	Female_ChR2
	1#	8.824	6.864	8.514	8.674
	2#	4.749	5.347	6.92	7.827
	3#	6.081	3.434	7.921	9.968
	4#	5.985	5.678	7.638	9.485
	5#	7.299	5.297	5.573	6.001
	6#	5.425	6.47	6.341	8.302
	7#	6.779	3.548	5.195	8.136
	8#	5.498	6.141	7.044	8.224

## Sheet: Figure 2_Supple_1B
	Time percent in chasing
	Animals	Male_Dio	Male_ENPHR3.0	Female_Dio	Female_eNPHR3.0
	1#	5.595	1.98	7.364	0.612
	2#	7.021	0	9.854	0.962
	3#	8.749	0.596	3.92	0.827
	4#	6.324	0.304	6.414	0.576
	5#	5.711	0.558	7.715	0.691
	6#	6.453	0	5.06	0.531
	7#	7.125	0	8.018	0.817
	8#	6.343	0.416	6.208	0

## Sheet: Figure 2_Supple_1C
		Time percent in grooming
		Animals	Male_Dio	Male_ChR2	Female_Dio	Female_ChR2
		1#	7.194	4.338	3.934	3.44
		2#	5.918	5.38	7.186	2.637
		3#	7.439	4.211	4.143	6.756
		4#	6.064	6.918	4.371	5.787
		5#	5.947	5.144	3.338	4.054
		6#	3.126	7.258	8.144	5.189
		7#	4.631	4.159	5.944	3.917
		8#	3.245	6.151	6.302	4.526

## Sheet: Figure 2_Supple_1D
			Time percent in grooming
			Animals	Male_Dio	Male_ENPHR3.0	Female_Dio	Female_eNPHR3.0
			1#	3.708	3.195	5.818	6.018
			2#	5.652	5.981	4.859	5.817
			3#	4.817	7.149	5.635	3.112
			4#	7.287	3.529	3.552	3.947
			5#	4.719	4.465	5.614	5.554
			6#	3.178	6.751	7.169	6.344
			7#	5.142	7.772	8.616	3.863
			8#	4.398	2.909	4.679	7.344

## Sheet: Figure 2_Supple_1E
Male_Dio_Central Area Time Percent				Male_ChR2_Central Area Time_Percent				Female_Dio_Central Area Time Percent				Female_ChR2_Central Area Time_Percent
Animals	OFF	ON		Animals	OFF	ON		Animals	OFF	ON		Animals	OFF	ON
1#	25.16	32.11		1#	24.84	17.71		1#	17.7	26.25		1#	16.12	15.64
2#	9.14	15.5		2#	10.31	10.07		2#	16.41	17.25		2#	26.01	35.98
3#	6.72	13.46		3#	7.34	16.47		3#	14.37	22.8		3#	18.08	12.2
4#	13.83	10.31		4#	17.27	14.45		4#	9.27	15.22		4#	14.08	9.07
5#	7.42	12.19		5#	17.94	10.7		5#	23.5	14.04		5#	21.44	27.76
6#	18.2	24.08		6#	14.74	19.19		6#	17.99	9.84		6#	19.5	8.74
7#	9.07	11.44		7#	12.03	23.83		7#	21.12	13.52		7#	14.99	8.98
8#	27.76	19.5		8#	22.58	17.38		8#	13.83	18.15		8#	12.69	15.06
Male_Dio_Distance				Male_ChR2_Distance				Female_Dio_Distance				Female_ChR2_Distance
Animals	OFF	ON		Animals	OFF	ON		Animals	OFF	ON		Animals	OFF	ON
1#	2376.36	3152.12		1#	1632.57	1384.44		1#	1766.99	2318.91		1#	3216.64	2186.69
2#	1132.93	1981.23		2#	2696.26	1695.69		2#	2438.09	2945.49		2#	1906.69	2036.47
3#	1512.18	2180.65		3#	1597.5	2576.63		3#	2881.23	2830.46		3#	1766.9	2778.4
4#	2501.92	2024.19		4#	3069.39	2373.02		4#	1846.97	1471.44		4#	2118.94	2854.98
5#	1641.25	2512.29		5#	2399.44	2512.47		5#	2568.24	2895.27		5#	3618.67	3371.27
6#	2778.4	2118.94		6#	1957.39	2428.91		6#	2737.73	2547.05		6#	2185.86	3090.01
7#	2854.98	3618.67		7#	2707.57	1896.4		7#	1658.18	2045.17		7#	3095.28	3535.78
8#	3371.27	2185.86		8#	1223.4	1661.66		8#	2411.08	3421.61		8#	1711.26	1752.91

## Sheet: Figure 2_Supple_1F
	Male_Dio_Central Area Time_Percent				Male_eNPHR3.0_Central Area Time_Percent				Female_Dio_Central Area Time_Percent				Female_eNPHR3.0_Central Area Time_Percent
	Animals	OFF	ON		Animals	OFF	ON		Animals	OFF	ON		Animals	OFF	ON
	1#	10.37	18.82		1#	23.15	36.01		1#	7.6	10.66		1#	17.1	14.66
	2#	21.46	24.07		2#	10.49	14.08		2#	8.42	6.74		2#	8.42	6.74
	3#	9.64	14.61		3#	17.14	16.97		3#	11.82	9.57		3#	11.82	9.57
	4#	12.15	14.85		4#	12.18	19.53		4#	20.77	18.42		4#	20.77	18.42
	5#	13.48	6.72		5#	9.46	14.63		5#	17.12	13.99		5#	17.12	13.99
	6#	10.69	7.47		6#	10.23	13.28		6#	23.68	37.03		6#	17.03	13.68
	7#	15.87	25.94		7#	9.06	13.26		7#	15.49	28.17		7#	15.49	18.17
									8#	10.17	14.04		8#	10.17	15.04
	Male_Dio_Distance				Male_eNPHR3.0_Distance				Female_Dio_Central Area Time_Percent				Female_eNPHR3.0_Distance
	Animals	OFF	ON		Animals	OFF	ON		Animals	OFF	ON		Animals	OFF	ON
	1#	2789.34	2331.16		1#	3421.61	2596.3		1#	2049.86	1186.08		1#	2186.08	3049.86
	2#	2890.44	2103.98		2#	2882.07	2595.15		2#	2504.37	2109.59		2#	2504.37	2109.59
	3#	1405.1	1601.68		3#	2272.9	3261.06		3#	1060.41	1749.09		3#	4060.41	3749.09
	4#	2218.95	2889.93		4#	4011.77	3523.82		4#	1984.46	1968.87		4#	1984.46	1968.87
	5#	2581.71	3064.95		5#	2350.35	1406.19		5#	1711.5	2128		5#	1711.5	2128
	6#	2468.3	1307.47		6#	3611.69	3230.26		6#	1189.05	1565.4		6#	1189.05	1565.4
	7#	1754.93	1919.02		7#	3345.44	2661.7		7#	2448.39	3393.62		7#	3448.39	3093.62
									8#	3324.48	2924.05		8#	3324.48	2924.05
