# Supplementary material for: Dorsal raphe nucleus to anterior cingulate cortex 5-HTergic neural circuit modulates consolation and sociability
Source: eLife. 2021 Jun 3;10:e67638. doi: 10.7554/eLife.67638 (PMC8213405; doi:10.7554/eLife.67638)
Supplement: Figure 2—figure supplement 2—source data 1. [file elife-67638-fig2-figsupp2-data1.xlsx]

## Sheet: Figure 2_figure supplement_2
	Animals	Allogrooming_time_percent	Allogrooming_Frequency			Chasing_time_percent	Chasing_Frequency
		(A)	(B)			(C)	(D)
	Male_Enphr_On_1	0.51	1			1.98	2
	Male_Enphr_On_2	0	0			0	0
	Male_Enphr_On_3	0	0			0.596	1
	Male_Enphr_On_4	0.26	1			0.304	1
	Male_Enphr_On_5	0.66	2			0.558	1
	Male_Enphr_On_6	0	0			0	0
	Male_Enphr_On_8	0.42	1			0.413	1
	Male_eNPHR3_Off_1	5.382	6			7.36	8
	Male_eNPHR3_Off_2	6.887	7			5.85	7
	Male_eNPHR3_Off_3	5.495	4			3.92	4
	Male_eNPHR3_Off_4	6.282	5			6.41	5
	Male_eNPHR3_Off_5	6.434	7			7.72	7
	Male_eNPHR3_Off_6	4.736	4			5.06	6
	Male_eNPHR3_Off_8	5.593	5			6.02	8
	Female_eNPHR_On_1	0.89	1			0.612	1
	Female_eNPHR_On_2	0	0			0.962	1
	Female_eNPHR_On_3	0.32	1			0.827	2
	Female_eNPHR_On_4	0.29	1			0.576	1
	Female_eNPHR_On_5	0	0			0.691	1
	Female_eNPHR_On_6	0.41	1			0.531	1
	Female_eNPHR_On_7	0.72	2			0.817	2
	Female_eNPHR_On_8	0	0			0	0
	Female_eNPHR_Off_1	6.309	5			4.563	7
	Female_eNPHR_Off_2	4.256	5			5.786	6
	Female_eNPHR_Off_3	4.806	4			6.765	8
	Female_eNPHR_Off_4	7.358	8			4.046	5
	Female_eNPHR_Off_5	8.507	6			5.613	4
	Female_eNPHR_Off_6	5.232	5			6.755	6
	Female_eNPHR_Off_7	4.988	4			3.783	3
	Female_eNPHR_Off_8	6.154	7			6.992	5
