# Supplementary material for: Dorsal raphe nucleus to anterior cingulate cortex 5-HTergic neural circuit modulates consolation and sociability
Source: eLife. 2021 Jun 3;10:e67638. doi: 10.7554/eLife.67638 (PMC8213405; doi:10.7554/eLife.67638)
Supplement: Figure 2—source data 1. [file elife-67638-fig2-data1.xls]

## Sheet: Figure 2C
Time percent in allogrooming
Animals	CTR_M_Dio	CTR_M_ChR2	CTR_F_Dio	CTR_F_ChR2
1#	6.192	6.789	6.008	5.492
2#	7.355	8.356	5.496	6.024
3#	3.247	5.415	3.95	7.733
4#	4.887	7.733	7.565	8.154
5#	4.844	4.826	5.835	6.388
6#	7.233	4.247	6.838	5.285
7#	5.301	2.794	2.236	3.214
8#	6.719	5.547	5.573	5.267

## Sheet: Figure 2D
Time percent in allogrooming
Animals	Male_Dio	Male_ENPHR3.0	Female_Dio	Female_eNPHR3.0
1#	3.56	0.51	5.382	0.892
2#	6.128	0	6.887	0
3#	4.887	0	5.495	0.318
4#	3.373	0.263	6.282	0.292
5#	8.555	0.656	6.434	0
6#	5.371	0	4.736	0.413
7#	6.233	0.609	5.593	0.716
8#	4.682	0.416	3.199	0

## Sheet: Figure 2E
Male_Dio				Male_ChR2				Female_Dio				Female_ChR2
Animals	OFF	ON		Animals	OFF	ON		Animals	OFF	ON		Animals	OFF	ON
1#	0.19961	0.24183		1#	0.15737	0.2819		1#	0.39802	0.24047		1#	0.36568	0.48636
2#	0.21019	0.16232		2#	0.37668	0.35148		2#	0.2965	0.34333		2#	0.16303	0.28114
3#	0.15724	0.11128		3#	0.16502	0.26478		3#	0.30321	0.23486		3#	0.27764	0.58009
4#	0.31834	0.32811		4#	0.24562	0.48636		4#	0.1319	0.16723		4#	0.42511	0.39771
5#	0.11888	0.17427		5#	0.20592	0.30207		5#	0.26642	0.27277		5#	0.2103	0.5828
6#	0.30056	0.4141		6#	0.40305	0.35117		6#	0.18779	0.17332		6#	0.45767	0.36062
7#	0.22266	0.16909		7#	0.14569	0.25717		7#	0.26481	0.31123		7#	0.12857	0.40209
8#	0.46998	0.47557		8#	0.27204	0.33472		8#	0.44493	0.40235		8#	0.29126	0.35079

## Sheet: Figure 2F
	Male_Dio				Male_eNPHR3.0				Female_Dio				Female_eNPHR3.0
	Animals	OFF	ON		Animals	OFF	ON		Animals	OFF	ON		Animals	OFF	ON
	1#	0.27629	0.36177		1#	0.26202	0.15972		1#	0.25026	0.21114		1#	0.2704	0.05361
	2#	0.33215	0.14618		2#	0.24078	-0.07075		2#	0.27296	0.13731		2#	0.36117	0.10875
	3#	0.41981	0.40957		3#	0.3588	0.09243		3#	0.33436	0.36754		3#	0.35041	0.08261
	4#	0.27658	0.28114		4#	0.39285	-0.06922		4#	0.32887	0.30176		4#	0.29622	-0.02115
	5#	0.37692	0.28507		5#	0.32521	0.25842		5#	0.18244	0.21875		5#	0.28197	0.05818
	6#	0.46126	0.42945		6#	0.21999	0.04909		6#	0.17742	0.20107		6#	0.29224	0.08916
	7#	0.10891	0.25526		7#	0.28519	0.24293		7#	0.26639	0.29605		7#	0.17257	-0.0266
	8#	0.28523	0.28199		8#	0.25682	-0.10832		8#	0.25872	0.16042		8#	0.35307	0.06168

## Sheet: Figure 2G
Male_Dio_Central Area Time Percent				Male_ChR2_Central Area Time_Percent				Female_Dio_Central Area Time Percent				Female_ChR2_Central Area Time_Percent
Animals	OFF	ON		Animals	OFF	ON		Animals	OFF	ON		Animals	OFF	ON
1#	25.16	32.11		1#	24.84	17.71		1#	17.7	26.25		1#	16.12	15.64
2#	9.14	15.5		2#	10.31	10.07		2#	16.41	17.25		2#	26.01	35.98
3#	6.72	13.46		3#	7.34	16.47		3#	14.37	22.8		3#	18.08	12.2
4#	13.83	10.31		4#	17.27	14.45		4#	9.27	15.22		4#	14.08	9.07
5#	7.42	12.19		5#	17.94	10.7		5#	23.5	14.04		5#	21.44	27.76
6#	18.2	24.08		6#	14.74	19.19		6#	17.99	9.84		6#	19.5	8.74
7#	9.07	11.44		7#	12.03	23.83		7#	21.12	13.52		7#	14.99	8.98
8#	27.76	19.5		8#	22.58	17.38		8#	13.83	18.15		8#	12.69	15.06

## Sheet: Figure 2H
	Male_Dio_Central Area Time_Percent				Male_eNPHR3.0_Central Area Time_Percent				Female_Dio_Central Area Time_Percent				Female_eNPHR3.0_Central Area Time_Percent
	Animals	OFF	ON		Animals	OFF	ON		Animals	OFF	ON		Animals	OFF	ON
	1#	10.37	18.82		1#	23.15	36.01		1#	7.6	10.66		1#	17.1	14.66
	2#	21.46	24.07		2#	10.49	14.08		2#	8.42	6.74		2#	8.42	6.74
	3#	9.64	14.61		3#	17.14	16.97		3#	11.82	9.57		3#	11.82	9.57
	4#	12.15	14.85		4#	12.18	19.53		4#	20.77	18.42		4#	20.77	18.42
	5#	13.48	6.72		5#	9.46	14.63		5#	17.12	13.99		5#	17.12	13.99
	6#	10.69	7.47		6#	10.23	13.28		6#	23.68	37.03		6#	17.03	13.68
	7#	15.87	25.94		7#	9.06	13.26		7#	15.49	28.17		7#	15.49	18.17
									8#	10.17	14.04		8#	10.17	15.04
