# Supplementary material for: Dorsal raphe nucleus to anterior cingulate cortex 5-HTergic neural circuit modulates consolation and sociability
Source: eLife. 2021 Jun 3;10:e67638. doi: 10.7554/eLife.67638 (PMC8213405; doi:10.7554/eLife.67638)
Supplement: Figure 3—figure supplement 2—source data 1. [file elife-67638-fig3-figsupp2-data1.xls]

## Sheet: Figure 3_figure supplement_2A
Treatment	Name	Chasing time percent				Treatment	Name	Chasing time percent				Treatment	Name	Chasing time percent
Saline	Female_DIO1	7.908				Saline	Female_Gq1	6.0075				Saline	Female_GI1	3.85956
Saline	Female_DIO2	6.24017				Saline	Female_Gq2	8.066				Saline	Female_GI2	1.24611
Saline	Female_DIO3	8.13133				Saline	Female_Gq3	5.7872				Saline	Female_GI3	8.8278
Saline	Female_DIO4	7.86375				Saline	Female_Gq4	1.2875				Saline	Female_GI4	5.23654
Saline	Female_DIO5	3.3169				Saline	Female_Gq5	4.98672				Saline	Female_GI5	4.5135
Saline	Female_DIO6	9.02703				Saline	Female_Gq6	3.77443				Saline	Female_GI6	2.18597
Saline	Female_DIO7	6.4135				Saline	Female_Gq7	8.28248				Saline	Female_GI7	9.11418
						Saline	Female_Gq8	5.27177				Saline	Female_GI8	3.28379
Saline	Male_DIO1	5.22933
Saline	Male_DIO2	4.75734				Saline	Male_Gq1	3.87417				Saline	Male_GI1	3.56217
Saline	Male_DIO3	9.8541				Saline	Male_Gq2	4.03				Saline	Male_GI2	3.03867
Saline	Male_DIO4	6.40327				Saline	Male_Gq3	2.141				Saline	Male_GI3	7.3566
Saline	Male_DIO5	7.647				Saline	Male_Gq4	1.91583				Saline	Male_GI4	1.69983
Saline	Male_DIO6	7.92573				Saline	Male_Gq5	7.10184				Saline	Male_GI5	4.9309
Saline	Male_DIO7	6.69457				Saline	Male_Gq6	2.35071				Saline	Male_GI6	6.80547
Saline	Male_DIO8	3.38139				Saline	Male_Gq7	5.52336				Saline	Male_GI7	7.57592
CNO	Female_DIO1	4.884				CNO	Female_Gq1	2.59133				CNO	Female_GI1	1.75834
CNO	Female_DIO2	11.8533				CNO	Female_Gq2	9.66549				CNO	Female_GI2	2.4797
CNO	Female_DIO3	9.35309				CNO	Female_Gq3	4.0165				CNO	Female_GI3	1.22746
CNO	Female_DIO4	8.34597				CNO	Female_Gq4	3.45918				CNO	Female_GI4	4.16418
CNO	Female_DIO5	6.78				CNO	Female_Gq5	5.88905				CNO	Female_GI5	2.59462
CNO	Female_DIO6	7.9493				CNO	Female_Gq6	7.83153				CNO	Female_GI6	3.4834
CNO	Female_DIO7	7.58236				CNO	Female_Gq7	7.0988				CNO	Female_GI7	3.55007
						CNO	Female_Gq8	1.96521				CNO	Female_GI8	1.45877
CNO	Male_DIO1	5.4017
CNO	Male_DIO2	4.8125				CNO	Male_Gq1	2.10983				CNO	Male_GI1	3.31283
CNO	Male_DIO3	8.81				CNO	Male_Gq2	3.84467				CNO	Male_GI2	2.23917
CNO	Male_DIO4	6.9879				CNO	Male_Gq3	2.39533				CNO	Male_GI3	0.216667
CNO	Male_DIO5	5.58901				CNO	Male_Gq4	8.0127				CNO	Male_GI4	2.751
CNO	Male_DIO6	4.0456				CNO	Male_Gq5	3.84512				CNO	Male_GI5	1.54161
CNO	Male_DIO7	8.57274				CNO	Male_Gq6	7.495				CNO	Male_GI6	1.3533
CNO	Male_DIO8	5.8001				CNO	Male_Gq7	2.69813				CNO	Male_GI7	2.1091

## Sheet: Figure 3_figure supplement_2B
Treatment	Name	Grooming time percent				Treatment	Name	Grooming time percent				Treatment	Name	Grooming time percent
Saline	Female_DIO1	4.25667				Saline	Female_Gq1	4.82667				Saline	Female_GI1	7.60367
Saline	Female_DIO2	2.226				Saline	Female_Gq2	2.74271				Saline	Female_GI2	5.1663
Saline	Female_DIO3	1.75858				Saline	Female_Gq3	5.44271				Saline	Female_GI3	5.268
Saline	Female_DIO4	4.49577				Saline	Female_Gq4	7.81217				Saline	Female_GI4	2.932
Saline	Female_DIO5	2.71354				Saline	Female_Gq5	4.32				Saline	Female_GI5	4.43801
Saline	Female_DIO6	8.33446				Saline	Female_Gq6	3.6499				Saline	Female_GI6	3.89519
Saline	Female_DIO7	6.69289				Saline	Female_Gq7	6.998				Saline	Female_GI7	2.38805
						Saline	Female_Gq8	1.55027				Saline	Female_GI8	6.55334
Saline	Male_DIO1	3.39981
Saline	Male_DIO2	4.1148				Saline	Male_Gq1	2.84049				Saline	Male_GI1	4.81217
Saline	Male_DIO3	2.8782				Saline	Male_Gq2	2.26217				Saline	Male_GI2	4.7365
Saline	Male_DIO4	6.53384				Saline	Male_Gq3	5.50167				Saline	Male_GI3	0
Saline	Male_DIO5	5.5465				Saline	Male_Gq4	3.74367				Saline	Male_GI4	6.95817
Saline	Male_DIO6	1.03782				Saline	Male_Gq5	7.42				Saline	Male_GI5	8.15202
Saline	Male_DIO7	6.3844				Saline	Male_Gq6	1.51819				Saline	Male_GI6	5.93061
Saline	Male_DIO8	7.40718				Saline	Male_Gq7	2.66875				Saline	Male_GI7	4.79688
CNO	Female_DIO1	1.76767				CNO	Female_Gq1	9.88333				CNO	Female_GI1	3.57507
CNO	Female_DIO2	9.87639				CNO	Female_Gq2	5.411				CNO	Female_GI2	4.77421
CNO	Female_DIO3	2.33192				CNO	Female_Gq3	8.13235				CNO	Female_GI3	6.17716
CNO	Female_DIO4	5.00267				CNO	Female_Gq4	1.4546				CNO	Female_GI4	2.22218
CNO	Female_DIO5	4.8884				CNO	Female_Gq5	4.2503				CNO	Female_GI5	1.92349
CNO	Female_DIO6	6.8756				CNO	Female_Gq6	1.62824				CNO	Female_GI6	4.5698
CNO	Female_DIO7	0				CNO	Female_Gq7	2.21176				CNO	Female_GI7	3.74712
						CNO	Female_Gq8	5.66556				CNO	Female_GI8	3.429
CNO	Male_DIO1	3.50164
CNO	Male_DIO2	0				CNO	Male_Gq1	3.50617				CNO	Male_GI1	2.70417
CNO	Male_DIO3	3.9075				CNO	Male_Gq2	4.96083				CNO	Male_GI2	5.9335
CNO	Male_DIO4	1.96407				CNO	Male_Gq3	5.43667				CNO	Male_GI3	0
CNO	Male_DIO5	2.70756				CNO	Male_Gq4	0				CNO	Male_GI4	4.9763
CNO	Male_DIO6	4.9098				CNO	Male_Gq5	4.89086				CNO	Male_GI5	3.54662
CNO	Male_DIO7	1.0773				CNO	Male_Gq6	7.21616				CNO	Male_GI6	1.76342
CNO	Male_DIO8	5.3589				CNO	Male_Gq7	2.42049				CNO	Male_GI7	7.236

## Sheet: Figure 3_figure supplement_2C
Treatment	Name	Distance			Treatment	Name	Distance			Treatment	Name	Distance
Saline	Female_DIO1	4131.24			Saline	Female_Gq1	4756.48			Saline	Female_GI1	1340.61
Saline	Female_DIO2	3864.57			Saline	Female_Gq2	3414.78			Saline	Female_GI2	4810.79
Saline	Female_DIO3	3869.57			Saline	Female_Gq3	5786.18			Saline	Female_GI3	2777.92
Saline	Female_DIO4	1446.6			Saline	Female_Gq4	2096.29			Saline	Female_GI4	4134.29
Saline	Female_DIO5	5133.94			Saline	Female_Gq5	1777.69			Saline	Female_GI5	3690.49
Saline	Female_DIO6	5000.82			Saline	Female_Gq6	1848.42			Saline	Female_GI6	2644.07
Saline	Female_DIO7	2258.37			Saline	Female_Gq7	4114.99			Saline	Female_GI7	1858.72
					Saline	Female_Gq8	4868.86			Saline	Female_GI8	1674.03
Saline	Male_DIO1	3477.4
Saline	Male_DIO2	4022.91			Saline	Male_Gq1	4893.93			Saline	Male_GI1	3646.41
Saline	Male_DIO3	5644.07			Saline	Male_Gq2	4632.00			Saline	Male_GI2	4922.54
Saline	Male_DIO4	5840.56			Saline	Male_Gq3	6847.13			Saline	Male_GI3	3037
Saline	Male_DIO5	1858.72			Saline	Male_Gq4	1962.59			Saline	Male_GI4	1246.8
Saline	Male_DIO6	2691.87			Saline	Male_Gq5	3686.85			Saline	Male_GI5	3313.96
Saline	Male_DIO7	1674.03			Saline	Male_Gq6	1069.70			Saline	Male_GI6	3499.46
Saline	Male_DIO8	2823.18			Saline	Male_Gq7	4240.30			Saline	Male_GI7	2043.57
CNO	Female_DIO1	4767.94			CNO	Female_Gq1	1459.96			CNO	Female_GI1	3115.27
CNO	Female_DIO2	1611.56			CNO	Female_Gq2	5406.69			CNO	Female_GI2	4301.43
CNO	Female_DIO3	4951.25			CNO	Female_Gq3	2588.1			CNO	Female_GI3	2147.67
CNO	Female_DIO4	2974.67			CNO	Female_Gq4	4346.56			CNO	Female_GI4	5375.77
CNO	Female_DIO5	2348.87			CNO	Female_Gq5	1757.38			CNO	Female_GI5	2235.18
CNO	Female_DIO6	3120.83			CNO	Female_Gq6	1055.19			CNO	Female_GI6	4168.25
CNO	Female_DIO7	2549.13			CNO	Female_Gq7	2745.47			CNO	Female_GI7	5165.42
					CNO	Female_Gq8	1322.10			CNO	Female_GI8	3029.83
CNO	Male_DIO1	3086.44
CNO	Male_DIO2	4348.87			CNO	Male_Gq1	4542.99			CNO	Male_GI1	3879.32
CNO	Male_DIO3	3120.83			CNO	Male_Gq2	2567.67			CNO	Male_GI2	2460.54
CNO	Male_DIO4	4549.13			CNO	Male_Gq3	2517.49			CNO	Male_GI3	4194.51
CNO	Male_DIO5	3128.28			CNO	Male_Gq4	2272.83			CNO	Male_GI4	5150.52
CNO	Male_DIO6	1474.42			CNO	Male_Gq5	2546.4			CNO	Male_GI5	4862.57
CNO	Male_DIO7	4936.08			CNO	Male_Gq6	3426.62			CNO	Male_GI6	3605.99
CNO	Male_DIO8	3885.50			CNO	Male_Gq7	3906.97			CNO	Male_GI7	2069.28
