# Supplementary material for: Dorsal raphe nucleus to anterior cingulate cortex 5-HTergic neural circuit modulates consolation and sociability
Source: eLife. 2021 Jun 3;10:e67638. doi: 10.7554/eLife.67638 (PMC8213405; doi:10.7554/eLife.67638)
Supplement: Figure 3—source data 1. [file elife-67638-fig3-data1.xls]

## Sheet: Figure 3G
Treatment	Name	Allogrooming time percent				Treatment	Name	Allogrooming time percent				Treatment	Name	Allogrooming time percent
Saline	Female_DIO1	10.6233				Saline	Female_Gq1	8.10417				Saline	Female_GI1	11.904
Saline	Female_DIO2	5.30567				Saline	Female_Gq2	6.7041				Saline	Female_GI2	4.1317
Saline	Female_DIO3	6.50783				Saline	Female_Gq3	10.5765				Saline	Female_GI3	6.61655
Saline	Female_DIO4	4.6675				Saline	Female_Gq4	5.85923				Saline	Female_GI4	9.35938
Saline	Female_DIO5	3.4021				Saline	Female_Gq5	7.2211				Saline	Female_GI5	9.07278
Saline	Female_DIO6	7.389				Saline	Female_Gq6	3.1933				Saline	Female_GI6	7.38835
Saline	Female_DIO7	7.389				Saline	Female_Gq7	4.98639				Saline	Female_GI7	5.64336
						Saline	Female_Gq8	7.15				Saline	Female_GI8	4.44509
Saline	Male_DIO1	6.1915
Saline	Male_DIO2	9.546				Saline	Male_Gq1	8.161				Saline	Male_GI1	12.9833
Saline	Male_DIO3	4.9909				Saline	Male_Gq2	10.765				Saline	Male_GI2	10.1388
Saline	Male_DIO4	4.0057				Saline	Male_Gq3	5.05417				Saline	Male_GI3	5.5185
Saline	Male_DIO5	7.083				Saline	Male_Gq4	5.623				Saline	Male_GI4	6.7173
Saline	Male_DIO6	8.557				Saline	Male_Gq5	4.40533				Saline	Male_GI5	6.29033
Saline	Male_DIO7	3.59316				Saline	Male_Gq6	9.15878				Saline	Male_GI6	8.82613
Saline	Male_DIO8	8.85319				Saline	Male_Gq7	6.52863				Saline	Male_GI7	4.6978
CNO	Female_DIO1	11.7108				CNO	Female_Gq1	7.521				CNO	Female_GI1	0.92
CNO	Female_DIO2	5.21617				CNO	Female_Gq2	8.0844				CNO	Female_GI2	1.39536
CNO	Female_DIO3	6.01953				CNO	Female_Gq3	7.6626				CNO	Female_GI3	0.2186
CNO	Female_DIO4	5.8554				CNO	Female_Gq4	8.94156				CNO	Female_GI4	2.81347
CNO	Female_DIO5	9.037				CNO	Female_Gq5	5.3309				CNO	Female_GI5	6.99376
CNO	Female_DIO6	5.2516				CNO	Female_Gq6	4.3127				CNO	Female_GI6	2.53553
CNO	Female_DIO7	7.43107				CNO	Female_Gq7	6.39035				CNO	Female_GI7	4.14955
						CNO	Female_Gq8	9.23141				CNO	Female_GI8	1.8852
CNO	Male_DIO1	9.3431
CNO	Male_DIO2	8.354				CNO	Male_Gq1	5.07567				CNO	Male_GI1	2.57317
CNO	Male_DIO3	6.7041				CNO	Male_Gq2	6.386				CNO	Male_GI2	1.47833
CNO	Male_DIO4	7.7847				CNO	Male_Gq3	10.2217				CNO	Male_GI3	2.10433
CNO	Male_DIO5	5.76128				CNO	Male_Gq4	4.71433				CNO	Male_GI4	2.701
CNO	Male_DIO6	4.20128				CNO	Male_Gq5	7.78786				CNO	Male_GI5	3.4996
CNO	Male_DIO7	8.084				CNO	Male_Gq6	6.47057				CNO	Male_GI6	1.25661
CNO	Male_DIO8	7.88512				CNO	Male_Gq7	8.211				CNO	Male_GI7	1.19624

## Sheet: Figure 3H
Treatment	Name	Social preference ratio				Treatment	Name	Social preference ratio				Treatment	Name	Social preference ratio
Saline	Female_DIO1	0.404954				Saline	Female_Gq1	0.520592				Saline	Female_GI1	0.283833
Saline	Female_DIO2	0.469869				Saline	Female_Gq2	0.122168				Saline	Female_GI2	0.43013
Saline	Female_DIO3	0.513215				Saline	Female_Gq3	0.180878				Saline	Female_GI3	0.311842
Saline	Female_DIO4	0.053193				Saline	Female_Gq4	0.137251				Saline	Female_GI4	0.517205
Saline	Female_DIO5	0.0287126				Saline	Female_Gq5	0.440356				Saline	Female_GI5	0.559872
Saline	Female_DIO6	0.286705				Saline	Female_Gq6	0.132025				Saline	Female_GI6	0.17111
Saline	Female_DIO7	0.0481082				Saline	Female_Gq7	0.587923				Saline	Female_GI7	0.560008
						Saline	Female_Gq8	0.564652				Saline	Female_GI8	0.410231
Saline	Male_DIO1	0.219061
Saline	Male_DIO2	0.21318				Saline	Male_Gq1	0.379214				Saline	Male_GI1	0.205537
Saline	Male_DIO3	0.320494				Saline	Male_Gq2	0.230651				Saline	Male_GI2	0.568121
Saline	Male_DIO4	0.193384				Saline	Male_Gq3	0.34041				Saline	Male_GI3	0.341606
Saline	Male_DIO5	0.326048				Saline	Male_Gq4	0.0591633				Saline	Male_GI4	0.390041
Saline	Male_DIO6	0.0739933				Saline	Male_Gq5	0.508467				Saline	Male_GI5	0.111253
Saline	Male_DIO7	0.172253				Saline	Male_Gq6	0.564614				Saline	Male_GI6	0.426384
Saline	Male_DIO8	0.362558				Saline	Male_Gq7	0.11888				Saline	Male_GI7	0.561965
CNO	Female_DIO1	0.66267				CNO	Female_Gq1	0.306749				CNO	Female_GI1	0.0889989
CNO	Female_DIO2	0.353333				CNO	Female_Gq2	0.22787				CNO	Female_GI2	0.136229
CNO	Female_DIO3	0.259453				CNO	Female_Gq3	0.218491				CNO	Female_GI3	0.19449
CNO	Female_DIO4	0.137951				CNO	Female_Gq4	0.15959				CNO	Female_GI4	0.0482021
CNO	Female_DIO5	0.201319				CNO	Female_Gq5	0.105842				CNO	Female_GI5	0.0144465
CNO	Female_DIO6	0.514816				CNO	Female_Gq6	0.119487				CNO	Female_GI6	-0.0428053
CNO	Female_DIO7	0.168143				CNO	Female_Gq7	0.295427				CNO	Female_GI7	0.16278
						CNO	Female_Gq8	0.187008				CNO	Female_GI8	0.128002
CNO	Male_DIO1	0.170531				CNO	Male_Gq1	0.402663				CNO	Male_GI1	0.130511
CNO	Male_DIO2	0.0260651				CNO	Male_Gq2	0.341112				CNO	Male_GI2	-0.0514313
CNO	Male_DIO3	0.206066				CNO	Male_Gq3	0.383461				CNO	Male_GI3	0.133007
CNO	Male_DIO4	0.593061				CNO	Male_Gq4	0.396338				CNO	Male_GI4	-0.0920923
CNO	Male_DIO5	0.13981				CNO	Male_Gq5	0.160071				CNO	Male_GI5	0.257947
CNO	Male_DIO6	0.196847				CNO	Male_Gq6	0.376603				CNO	Male_GI6	0.142343
CNO	Male_DIO7	0.090101				CNO	Male_Gq7	0.0301689				CNO	Male_GI7	0.182401
CNO	Male_DIO8	0.261748

## Sheet: Figure 3I
Treatment	Name	Central area time percent				Treatment	Name	Central area time percent				Treatment	Name	Central area time percent
Saline	Female_DIO1	16.7069				Saline	Female_Gq1	10.8095				Saline	Female_GI1	22.2322
Saline	Female_DIO2	11.4097				Saline	Female_Gq2	21.5691				Saline	Female_GI2	12.0592
Saline	Female_DIO3	14.2995				Saline	Female_Gq3	36.651				Saline	Female_GI3	23.5644
Saline	Female_DIO4	40.7243				Saline	Female_Gq4	5.47164				Saline	Female_GI4	6.04731
Saline	Female_DIO5	22.7356				Saline	Female_Gq5	13.8075				Saline	Female_GI5	18.8023
Saline	Female_DIO6	11.6341				Saline	Female_Gq6	10.9373				Saline	Female_GI6	11.4173
Saline	Female_DIO7	25.6602				Saline	Female_Gq7	39.615				Saline	Female_GI7	13.8946
						Saline	Female_Gq8	36.687				Saline	Female_GI8	17.9542
Saline	Male_DIO1	24.4484
Saline	Male_DIO2	37.8291				Saline	Male_Gq1	7.34158				Saline	Male_GI1	9.78452
Saline	Male_DIO3	11.4173				Saline	Male_Gq2	17.3829				Saline	Male_GI2	22.7273
Saline	Male_DIO4	16.7864				Saline	Male_Gq3	20.6767				Saline	Male_GI3	12.319
Saline	Male_DIO5	23.8946				Saline	Male_Gq4	24.9314				Saline	Male_GI4	14.3728
Saline	Male_DIO6	18.9564				Saline	Male_Gq5	12.3591				Saline	Male_GI5	13.5961
Saline	Male_DIO7	17.9542				Saline	Male_Gq6	31.7737				Saline	Male_GI6	21.5486
Saline	Male_DIO8	13.3197				Saline	Male_Gq7	15.728				Saline	Male_GI7	19.4106
CNO	Female_DIO1	11.4134				CNO	Female_Gq1	19.0906				CNO	Female_GI1	21.5214
CNO	Female_DIO2	2.3529				CNO	Female_Gq2	37.4258				CNO	Female_GI2	7.19743
CNO	Female_DIO3	18.7831				CNO	Female_Gq3	32.7271				CNO	Female_GI3	4.64093
CNO	Female_DIO4	14.4935				CNO	Female_Gq4	31.3102				CNO	Female_GI4	4.69277
CNO	Female_DIO5	27.1966				CNO	Female_Gq5	25.5535				CNO	Female_GI5	10.2094
CNO	Female_DIO6	18.1289				CNO	Female_Gq6	14.9278				CNO	Female_GI6	14.1504
CNO	Female_DIO7	7.58278				CNO	Female_Gq7	23.9616				CNO	Female_GI7	24.98
						CNO	Female_Gq8	35.9463				CNO	Female_GI8	11.7614
CNO	Male_DIO1	17.8381
CNO	Male_DIO2	13.7197				CNO	Male_Gq1	24.3704				CNO	Male_GI1	10.0165
CNO	Male_DIO3	12.8421				CNO	Male_Gq2	9.36223				CNO	Male_GI2	18.633
CNO	Male_DIO4	28.1289				CNO	Male_Gq3	6.8612				CNO	Male_GI3	21.7623
CNO	Male_DIO5	7.58278				CNO	Male_Gq4	1.50674				CNO	Male_GI4	12.5901
CNO	Male_DIO6	17.7304				CNO	Male_Gq5	16.7213				CNO	Male_GI5	8.4839
CNO	Male_DIO7	10.2316				CNO	Male_Gq6	8.28304				CNO	Male_GI6	4.256
CNO	Male_DIO8	17.2649				CNO	Male_Gq7	13.3266				CNO	Male_GI7	13.0845
