# Supplementary material for: Dorsal raphe nucleus to anterior cingulate cortex 5-HTergic neural circuit modulates consolation and sociability
Source: eLife. 2021 Jun 3;10:e67638. doi: 10.7554/eLife.67638 (PMC8213405; doi:10.7554/eLife.67638)
Supplement: Figure 4—figure supplement 2—source data 1. [file elife-67638-fig4-figsupp2-data1.xls]

## Sheet: Fiugure 4_Suppl 2
Allo	Female						Male
		After		Before				After		Before
	1	-0.668668		-0.00898315			1	-0.778194		-0.0283665
	2	-1.15013		-0.00797791			2	-1.22396		-0.00729784
	3	-0.354736		-0.0051022			3	-1.12165		-0.00801969
	4	-1.0229		-0.00298801			4	-0.337461		-0.00474497
	5	-0.880612		-0.00200868			5	-0.856494		-0.00340152
	6	-0.983504		-0.00436465			6	-0.581718		-0.00591296
Sniffing	Female						Male
		After		Before				After		Before
	1	-0.324625		-0.000415611			1	-0.790474		-0.00754368
	2	-0.185529		0.00633767			2	-0.5571		-0.0093042
	3	0.0699243		-0.00264956			3	-0.044069		-0.193894
	4	-0.0291567		0.00627641			4	-0.0875734		-0.0234773
	5	-0.85535		-0.0487839			5	-0.0632703		-0.0631354
	6	-0.0569883		-0.00300076			6	-0.176629		-0.0145084
Approching	Female						Male
		After		Before				After		Before
	1	-1.38175		-0.00076982			1	-1.54346		0.00833352
	2	-1.21365		-0.00885868			2	-1.32414		0.00779606
	3	-0.355527		0.00197014			3	-0.769648		-0.00296745
	4	-1.42874		0.00944583			4	-2.87694		-0.00227063
	5	-1.11327		0.00807467			5	-0.530703		-0.00423081
	6	-0.843497		0.00980009			6	-0.270247		0.0010846
