# Supplementary material for: Dorsal raphe nucleus to anterior cingulate cortex 5-HTergic neural circuit modulates consolation and sociability
Source: eLife. 2021 Jun 3;10:e67638. doi: 10.7554/eLife.67638 (PMC8213405; doi:10.7554/eLife.67638)
Supplement: Figure 4—source data 1. [file elife-67638-fig4-data1.xls]

## Sheet: Figure_E2-I2
Allo	Female						Male
		After		Before				After		Before
	1	3.33988		0.00245338			1	3.44234		0.00913621
	2	2.39202		0.00911685			2	1.59848		0.0758674
	3	1.83585		0.0256999			3	1.28901		0.00110753
	4	1.50788		0.0206928			4	2.48235		0.00306314
	5	2.73519		0.0375123			5	3.04494		0.00209489
	6	3.66223		0.00194682			6	4.04243		0.00599721
Sniffing	Female						Male
		After		Before				After		Before
	1	1.40566		0.025851			1	1.54541		0.074261
	2	1.25038		0.233124			2	0.720356		0.061601
	3	0.4858		0.512769			3	0.948103		0.033474
	4	0.667313		0.070008			4	1.20158		0.134688
	5	1.81583		0.010743			5	0.391538		0.423282
	6	1.91736		0.060993			6	0.825138		0.078331
Approching	Female						Male
		After		Before				After		Before
	1	2.40566		0.00258514			1	2.35063		0.0065356
	2	1.25038		0.00233207			2	1.71271		0.0448503
	3	2.4858		0.00212769			3	1.99504		0.007715
	4	1.66731		0.0170008			4	2.18696		0.00259616
	5	1.86132		0.00335705			5	1.83233		0.00307159
	6	2.88764		0.00927456			6	1.91074		0.00496903
Self-grooming	Female						Male
		After		Before				After		Before
	1	0.00693888		0.0049773			1	0.0518199		0.00904249
	2	0.0929253		0.00140606			2	0.236263		0.00761814
	3	0.146188		0.060256			3	0.0995523		0.00269862
	4	-0.219908		0.0417213			4	0.0635353		0.00592276
	5	0.593467		0.0608722			5	0.00473621		0.00919798
	6	0.00398783		0.00616007			6	-0.117339		0.00889523
Running	Female						Male
		After		Before				After		Before
	1	0.16881		0.00191398			1	0.00248837		0.00121295
	2	-0.102263		-0.00112855			2	-0.118633		0.0260016
	3	-0.537206		0.00419533			3	0.0861015		-0.0244892
	4	-0.018437		0.00178196			4	0.281058		0.00944931
	5	0.0553		0.000126327			5	0.00626601		0.00267775
	6	-0.00208885		-0.00172256			6	0.00758533		0.038922

## Sheet: Figure_E4-I4
Allo	Female						Male
		After		Before				After		Before
	1	-0.0548828		-0.00179258			1	0.0057592		0.0087075
	2	0.0710527		0.0018073			2	-0.0256406		0.00177869
	3	0.0309567		0.00184113			3	0.00346889		0.00394583
	4	0.0836594		-0.00085561			4	0.0083879		0.00163781
	5	0.00710865		0.00361084			5	0.0283873		-0.00294888
Sniffing	Female						Male
		After		Before				After		Before
	1	-0.0116994		-0.00219461			1	0.00618221		0.00395215
	2	0.0281711		-0.00378176			2	0.00414221		0.005621
	3	0.00149284		-0.00762207			3	-0.00608809		-0.00420601
	4	0.00102199		0.00468837			4	-0.00426462		0.00196887
	5	-0.00170292		0.000886758			5	0.0025424		0.00223037
Approching	Female						Male
		After		Before				After		Before
	1	0.0117898		0.00624493			1	0.0245024		0.00183449
	2	0.0208009		0.000118678			2	0.0692874		0.00436882
	3	-0.0269817		0.000135732			3	0.0463644		-0.00163532
	4	0.0164936		-0.00636092			4	-0.031738		0.00353429
	5	0.0104458		-8.26373e-05			5	0.00761141		0.00242159
Self-grooming	Female						Male
		After		Before				After		Before
	1	-0.00071365		0.00192904			1	0.00189982		0.00575052
	2	-0.0235728		-0.00130884			2	0.00263358		0.00264325
	3	0.0101391		0.00134221			3	-0.00143692		0.00247899
	4	-0.0166064		0.00237153			4	0.00870725		-0.00186057
	5	0.0597247		-0.00183924			5	-0.00199049		0.00434539
Running	Female						Male
		After		Before				After		Before
	1	-0.00377671		-0.000775739			1	-0.00252237		-0.00650034
	2	-0.00472235		-0.00633023			2	-0.00166718		0.0124961
	3	0.0183532		0.00455373			3	-0.0181402		-0.00617646
	4	0.0562692		0.0346287			4	-0.192844		-0.0101695
	5	0.0603042		0.0118542			5	0.290353		0.0104208
