# Supplementary material for: Dorsal raphe nucleus to anterior cingulate cortex 5-HTergic neural circuit modulates consolation and sociability
Source: eLife. 2021 Jun 3;10:e67638. doi: 10.7554/eLife.67638 (PMC8213405; doi:10.7554/eLife.67638)
Supplement: Figure 5—figure supplement 2—source data 1. [file elife-67638-fig5-figsupp2-data1.xls]

## Sheet: Figure 5 figure supplement 2
DMSO
Allo	Female						Male
		After		Before				After		Before
	1	1.75742		0.00721081			1	2.81992		0.00553653
	2	3.16677		-0.00614614			2	1.78977		0.00761318
	3	2.25312		0.00634006			3	2.53145		0.0063257
	4	1.07375		0.00942994			4	4.59209		0.00469332
	5	3.28884		-0.00255741			5	3.65921		0.00796561
Anti-5-HT
Allo	Female						Male
		After		Before				After		Before
	1	-0.00863727		-0.000827342			1	-0.000931876		0.00352984
	2	-0.0548055		-0.000692466			2	0.0167908		-0.00423611
	3	-0.593182		0.00628445			3	0.00193576		0.00105799
	4	-0.0962055		-0.0012999			4	0.0019043		0.00239535
	5	-0.0401842		-0.00195796			5	-0.0012762		0.00347696
