# Supplementary material for: Dorsal raphe nucleus to anterior cingulate cortex 5-HTergic neural circuit modulates consolation and sociability
Source: eLife. 2021 Jun 3;10:e67638. doi: 10.7554/eLife.67638 (PMC8213405; doi:10.7554/eLife.67638)
Supplement: Figure 5—source data 1. [file elife-67638-fig5-data1.xls]

## Sheet: Figure 5_E2-I2
Allo	Female						Male
		After		Before				After		Before
	1	3.05059		0.00327945			1	4.08207		0.00602116
	2	0.890692		0.00280858			2	2.36524		0.00417461
	3	2.05799		0.00488837			3	2.2134		0.00949805
	4	2.2059		0.016312			4	1.71729		0.0173586
	5	1.33262		0.0021333			5	2.1069		0.00671082
	6	1.63479		0.00710087			6	1.80726		0.0038787
Sniffing	Female						Male
		After		Before				After		Before
	1	0.503536		0.008348			1	1.94745		0.0805158
	2	0.880508		0.0428			2	2.07062		0.00662632
	3	0.376697		0.060396			3	1.19991		0.00758971
	4	1.3637		0.010355			4	0.911187		0.00420926
	5	0.108762		0.035068			5	0.663662		-0.00744745
	6	0.414736		0.079449			6	2.01576		-0.0047392
Approching	Female						Male
		After		Before				After		Before
	1	2.50103		0.0137791			1	2.27415		0.00541513
	2	1.47069		0.00342417			2	1.24452		0.00233643
	3	1.06641		0.0163586			3	1.6397		0.00417584
	4	0.885417		0.0100215			4	1.36118		0.00904325
	5	1.50103		-0.00803048			5	1.41332		0.00624104
	6	1.87069		0.00450664			6	1.78029		0.0250241
Self-grooming	Female						Male
		After		Before				After		Before
	1	0.00693888		0.0049773			1	0.262574		0.00567421
	2	0.0929253		0.00140606			2	0.775835		0.00411462
	3	-0.146188		0.060256			3	-0.00108185		0.00951339
	4	0.0219908		-0.00417213			4	0.0364702		0.00968705
	5	0.593467		0.0808722			5	0.0417279		0.553999
	6	0.0819068		0.0770366			6	0.0633184		0.360139
Running	Female						Male
		After		Before				After		Before
	1	0.501574		-0.0155445			1	0.00771137		0.0980415
	2	-0.374344		0.000258364			2	0.0729318		0.00119883
	3	-0.125498		-0.00287507			3	0.0657049		-0.0192575
	4	-0.189612		-0.00300924			4	-0.0557504		-0.00994906
	5	0.0660305		0.000388674			5	0.0892561		0.00756166
	6	0.0347829		0.0292889			6	0.0556325		0.0443982

## Sheet: Figure 5_E4-I4
Allo	Female						Male
		After		Before				After		Before
	1	0.00212817		0.00371157			1	0.00292452		0.000800614
	2	0.00926315		-0.00228606			2	-0.00767318		0.000872854
	3	-0.00153453		-0.00217564			3	0.00618886		-0.000655692
	4	-0.00448548		0.00945168			4	0.000815847		0.00979457
	5	0.00846457		-0.00289615			5	0.00151937		-0.00557296
Sniffing	Female						Male
		After		Before				After		Before
	1	-0.0059562		0.00705887			1	-0.00018387		0.00322002
	2	0.00754386		0.000923695			2	0.00018188		0.00293592
	3	0.00926278		0.000585992			3	1.16166e-06		0.00691747
	4	-0.00424215		-0.00244107			4	5.04686e-05		0.00454158
	5	-0.000849071		0.00372018			5	-0.000129237		-0.000893098
Approching	Female						Male
		After		Before				After		Before
	1	-0.0142964		-0.00117626			1	0.00508531		-0.000549715
	2	0.00625319	`	-0.000138685			2	0.00127948		-0.00745124
	3	-0.0173562		-0.000871506			3	-0.00143835		0.00242385
	4	-0.000726535		-0.000569195			4	0.00750253		0.00976314
	5	0.0032877		-0.000346708			5	0.00684283		0.00523518
Self-grooming	Female						Male
		After		Before				After		Before
	1	0.0011055		0.00136767			1	0.00359246		0.00290017
	2	-0.011009		-0.00061882			2	0.00492444		0.00699882
	3	-0.000743376		-0.00030928			3	0.00568885		0.000859128
	4	0.00493428		-0.000521586			4	-0.00394658		0.00113125
	5	0.00195126		0.00469517			5	0.00123123		0.00821716
Running	Female						Male
		After		Before				After		Before
	1	-0.00397638		-0.000152931			1	0.0030288		0.00796683
	2	-0.0116667		-0.000209897			2	-0.0007578		-0.00179513
	3	0.0063233		0.00021381			3	-0.00211327		0.00263874
	4	0.00328851		0.00247722			4	0.00200217		0.00197228
	5	0.00171714		0.000868152			5	0.00179394		0.00213565
