# Supplementary material for: Dorsal raphe nucleus to anterior cingulate cortex 5-HTergic neural circuit modulates consolation and sociability
Source: eLife. 2021 Jun 3;10:e67638. doi: 10.7554/eLife.67638 (PMC8213405; doi:10.7554/eLife.67638)
Supplement: Figure 6—figure supplement 1—source data 1. [file elife-67638-fig6-figsupp1-data1.xls]

## Sheet: Figure 6—figure supplement 1A
		(Vehicle + Saline)-(Vehicle + CNO)
		Male	Femle
		7.61	1.43017
		5.414	10.3468
		9.29533	3.68117
		1.13683	2.0968
		3.848	7.61149
			4.59648
		( 8-OH-DPAT + Saline)-( 8-OH-DPAT + CNO)
		Male	Femle
		2.88667	5.43
		4.32767	-2.1
		-2.7525	-0.776167
		1.36217	-0.07779
		-2.01567	-0.372113
			-0.13389

## Sheet: Figure 6—figure supplement 1B
				(Vehicle + Saline)-(Vehicle + CNO)
				Male		Female
				0.180959		0.381035
				0.542251		0.296311
				0.35518		0.0206957
				0.1284		0.0958486
				0.393052		0.455307
						0.375505
				( 8-OH-DPAT + Saline)-( 8-OH-DPAT + CNO)
				Male		Female
				0.0323978		0.333393
				0.0269375		0.0384742
				0.0768932		-0.16504
				-0.123044		-0.0599312
				0.26259		0.0274184
						0.102492

## Sheet: Figure 6—figure supplement 1C
				(Vehicle + Saline)-(Vehicle + CNO)
				Male	Female
				9.85012	4.47714
				5.46466	7.19329
				4.46368	4.77875
				7.33998	2.3063
				1.64075	7.05109
				6.43696	4.05557
				(MDL 100907 + Saline)-(MDL 100907 + CNO)
				Male	Female
				5.31133	-2.31283
				4.49117	4.7905
				2.46017	7.9595
				4.20751	3.46512
				1.44705	2.58519
				2.33353	3.12007

## Sheet: Figure 6—figure supplement 1D
				(Vehicle + Saline)-(Vehicle + CNO)
				Male		Female
				-0.0102988		0.208148
				0.281802		0.49964
				0.360905		-0.0313996
				0.206974		0.0962764
				-0.0137572		0.216469
				0.51978		0.169014
				(MDL 100907 + Saline)-(MDL 100907 + CNO)
				Male		Female
				0.13259		0.119021
				0.250894		0.363653
				0.231349		0.152327
				0.180721		0.241609
				0.0538982		0.100596
				0.232782		0.0271678
