# Supplementary material for: Dorsal raphe nucleus to anterior cingulate cortex 5-HTergic neural circuit modulates consolation and sociability
Source: eLife. 2021 Jun 3;10:e67638. doi: 10.7554/eLife.67638 (PMC8213405; doi:10.7554/eLife.67638)
Supplement: Figure 6—figure supplement 2—source data 1. [file elife-67638-fig6-figsupp2-data1.xls]

## Sheet: Figure 6_figure supplement_2A
Consolation test
Vehicle + Saline
Male		Female
Animals	Grooming time percent	Animals	Grooming time percent
1#	3.83483	1#	4.91667
2#	6.5186	2#	2.88717
3#	0.911167	3#	5.78417
4#	7.90731	4#	7.66267
5#	5.94968	5#	3.78251
		6#	2.23567
Vehicle + CNO
Male		Female
Animals	Grooming time percent		Grooming time percent
1#	2.35933	1#	6.69369
2#	2.47431	2#	1.5455
3#	5.85794	3#	2.6278
4#	2.79749	4#	3.44302
5#	7.42383	5#	4.45375
		6#	4.84033
8-OH-DPAT + Saline
Male		Female
Animals	Grooming time percent		Grooming time percent
1#	3.80814	1#	3.06667
2#	4.52333	2#	3.2095
3#	9.63024	3#	5.02167
4#	2.18883	4#	3.83349
5#	7.422	5#	9.3182
		6#	7.00831
8-OH-DPAT + CNO
Male		Female
Animals	Grooming time percent		Grooming time percent
1#	2.46267	1#	2.04317
2#	4.09304	2#	6.70667
3#	5.70173	3#	2.2115
4#	2.33317	4#	5.08179
5#	4.89667	5#	2.98968
		6#	4.68053

## Sheet: Figure 6_figure supplement_2B
Open-field test
Vehicle + Saline
Male		Female
Animals	Distance traveled	Animals	Distance traveled
1#	2229.75	1#	2350.15
2#	3687.58	2#	2910.58
3#	3919.14	3#	2038.25
4#	3316.18	4#	2769.18
5#	1279.06	5#	3369.42
		6#	1985.93
Vehicle + CNO
Male		Female
Animals	Distance traveled	Animals	Distance traveled
1#	4806.13	1#	1959.63
2#	4803.54	2#	1328.94
3#	4298.37	3#	2958.19
4#	3190.95	4#	2107.06
5#	1636.22	5#	3334.57
		6#	1855.77
8-OH-DPAT + Saline
Male		Female
Animals	Distance traveled	Animals	Distance traveled
1#	4175.73	1#	1498.07
2#	2875.01	2#	2916.55
3#	1813.48	3#	1854.33
4#	3410.92	4#	2485.34
5#	3209.53	5#	1789.69
		6#	4076.16
8-OH-DPAT + CNO
Male		Female
Animals	Distance traveled	Animals	Distance traveled
1#	3544.23	1#	1654.29
2#	4547.28	2#	3797.88
3#	2163.52	3#	1997.7
4#	4964.13	4#	4366.58
5#	1395.45	5#	1849.52
		6#	269.532

## Sheet: Figure 6_figure supplement_2C
Consolation test
Vehicle + Saline
Male		Female
Animals	Grooming time percent	Animals	Grooming time percent
1#	3.30447	1#	4.17063
2#	10.5331	2#	6.52136
3#	4.31916	3#	5.41601
4#	5.058	4#	4.69479
5#	3.00323	5#	3.99332
6#	1.90277	6#	1.22524
Vehicle + CNO
Male		Female
Animals	Grooming time percent		Grooming time percent
1#	3.78024	1#	3.5436
2#	8.43688	2#	5.68447
3#	1.9166	3#	1.6798
4#	2.96458	4#	2.5253
5#	2.52528	5#	4.29842
6#	4.7042	6#	2.1867
MDL 100907 + Saline
Male		Female
Animals	Grooming time percent		Grooming time percent
1#	5.0786	1#	1.01467
2#	1.6705	2#	4.3184
3#	1.36133	3#	3.84283
4#	2.53317	4#	0.882833
5#	4.01569	5#	3.06325
6#	7.63954	6#	2.02317
MDL 100907 + CNO
Male		Female
Animals	Grooming time percent		Grooming time percent
1#	2.34767	1#	2.07033
2#	3.62567	2#	3.666
3#	1.6917	3#	0.941667
4#	5.62169	4#	3.20868
5#	2.87099	5#	4.18564
6#	3.86695	6#	5.90713

## Sheet: Figure 6_figure supplement_2D
Open-field test
Vehicle + Saline
Male		Female
Animals	Distance traveled	Animals	Distance traveled
1	2913.02	1	1595.53
2	2602.67	2	2538.69
3	2830.96	3	1908.8
4	1413.79	4	2616.87
5	2107.82	5	2519.24
6	3422.21	6	4106.39
Vehicle + CNO
Male		Female
Animals	Distance traveled	Animals	Distance traveled
1	1786.38		2594.28
2	3089.63		1268.7
3	3359.18		2687.28
4	1502.36		1542.58
5	2415.96		3908.7
6	1729.63		2706.99
MDL 100907 + Saline
Male		Female
Animals	Distance traveled	Animals	Distance traveled
1	4251.29		3468.73
2	2918.98		1918.4
3	3474.91		2415.62
4	2784.78		3968.69
5	5330.2		2156.48
6	1450.79		2149.26
MDL 100907 + CNO
Male		Female
Animals	Distance traveled	Animals	Distance traveled
1	3377.31		3251.05
2	3082.2		1587.41
3	2303.06		1971.36
4	1847.57		3352.63
5	2923.84		3281.65
6	4025.6		3319.46
