# Supplementary material for: Dorsal raphe nucleus to anterior cingulate cortex 5-HTergic neural circuit modulates consolation and sociability
Source: eLife. 2021 Jun 3;10:e67638. doi: 10.7554/eLife.67638 (PMC8213405; doi:10.7554/eLife.67638)
Supplement: Figure 6—source data 1. [file elife-67638-fig6-data1.xls]

## Sheet: Figure 6C
Consolation test
Vehicle + Saline
Male		Female
Animals	Allogrooming time percent	Animals	Allogrooming time percent
1#	8.47117	1#	6.49167
2#	6.34633	2#	12.0995
3#	10.9617	3#	4.439
4#	3.88333	4#	4.97445
5#	8.235	5#	9.15432
		6#	5.03677
Vehicle + CNO
Male		Female
Animals	Allogrooming time percent		Allogrooming time percent
1#	0.861167	1#	5.0615
2#	0.932333	2#	1.75267
3#	1.66633	3#	0.757833
4#	2.7465	4#	2.87765
5#	4.387	5#	1.54283
		6#	0.440286
8-OH-DPAT + Saline
Male		Female
Animals	Allogrooming time percent		Allogrooming time percent
1#	6.73333	1#	8.87833
2#	12.1335	2#	4.8015
3#	3.80583	3#	5.03717
4#	9.57667	4#	7.38045
5#	5.81517	5#	10.6749
		6#	2.60667
8-OH-DPAT + CNO
Male		Female
Animals	Allogrooming time percent		Allogrooming time percent
1#	3.84667	1#	3.44833
2#	7.80583	2#	6.9015
3#	6.55833	3#	5.81333
4#	8.2145	4#	7.45824
5#	7.83083	5#	11.047
		6#	2.74056

## Sheet: Figure 6D
Three-chamber test: social preference ratio
Vehicle + Saline
Animals	Male		Animals	Female
1#	0.357732		1#	0.336284
2#	0.597466		2#	0.448428
3#	0.510615		3#	0.11296
4#	0.227504		4#	0.280131
5#	0.369177		5#	0.555722
			6#	0.463815
Vehicle + CNO
Animals	Male		Animals	Female
1#	0.176773		1#	-0.0447507
2#	0.0552147		2#	0.152117
3#	0.155436		3#	0.0922639
4#	0.0991038		4#	0.184282
5#	-0.0238747		5#	0.100415
			6#	0.0883095
8-OH-DPAT + Saline
Animals	Male		Animals	Female
1#	0.434428		1#	0.488059
2#	0.296981		2#	0.339411
3#	0.376666		3#	0.253855
4#	0.241851		4#	0.349625
5#	0.415785		5#	0.189403
			6#	0.4099
8-OH-DPAT + CNO
Animals	Male		Animals	Female
1#	0.40203		1#	0.154666
2#	0.270043		2#	0.300937
3#	0.299773		3#	0.418895
4#	0.364895		4#	0.409556
5#	0.153195		5#	0.161985
			6#	0.307408

## Sheet: Figure 6E
Open-field test
Vehicle + Saline
Male		Female
Animals	Percent time in central area	Animals	Percent time in central area
1#	13.2533	1#	12.5233
2#	22.19	2#	27.62
3#	10.2067	3#	6.84667
4#	31.4067	4#	17.13
5#	24.9733	5#	10.8867
		6#	18.3067
Vehicle + CNO
Male		Female
Animals	Percent time in central area	Animals	Percent time in central area
1#	11.9533	1#	25.11
2#	13.9067	2#	5.82
3#	11.7567	3#	8.51667
4#	21.72	4#	12.0567
5#	18.7967	5#	21.0933
		6#	19.2867
8-OH-DPAT + Saline
Male		Female
Animals	Percent time in central area	Animals	Percent time in central area
1#	11.9833	1#	9.13667
2#	16.33	2#	14.1867
3#	6.12333	3#	10.9133
4#	19.14	4#	14.3733
5#	34.2967	5#	16.6833
		6#	12.6067
8-OH-DPAT + CNO
Male		Female
Animals	Percent time in central area	Animals	Percent time in central area
1#	10.36	1#	17.3567
2#	13.23	2#	21.1867
3#	7.92667	3#	14.3467
4#	21.8533	4#	18.96
5#	8.87	5#	11.43
		6#	7.24

## Sheet: Figure 6F
Consolation test
Vehicle + Saline
Male		Female
Animals	Allogrooming time percent	Animals	Allogrooming time percent
1#	13.4884	1#	6.44795
2#	7.1205	2#	8.4386
3#	5.67399	3#	8.38332
4#	8.0481	4#	5.3434
5#	5.3626	5#	8.72449
6#	9.086	6#	6.91389
Vehicle + CNO
Male		Female
Animals	Allogrooming time percent		Allogrooming time percent
1#	3.63828	1#	1.97081
2#	1.65584	2#	1.24531
3#	1.21031	3#	3.60457
4#	0.708117	4#	3.0371
5#	3.72185	5#	1.6734
6#	2.64904	6#	2.85832
MDL 100907 + Saline
Male		Female
Animals	Allogrooming time percent		Allogrooming time percent
1#	6.23667	1#	1.5315
2#	7.0685	2#	6.90667
3#	4.1635	3#	9.166
4#	6.529	4#	7.59083
5#	3.1571	5#	4.28519
6#	6.14853	6#	5.82907
MDL 100907 + CNO
Male		Female
Animals	Allogrooming time percent		Allogrooming time percent
1#	0.925333	1#	3.84433
2#	2.57733	2#	2.11617
3#	1.70333	3#	1.2065
4#	2.32149	4#	4.12571
5#	1.71005	5#	1.7
6#	3.815	6#	2.709

## Sheet: Figure 6G
Three-chamber test: social preference ratio
Vehicle + Saline
Animals	Male		Animals	Female
1#	0.116372		1#	0.302556
2#	0.378875		2#	0.511941
3#	0.420334		3#	0.1474
4#	0.316135		4#	0.216307
5#	0.120524		5#	0.184588
6#	0.510458		6#	0.157775
Vehicle + CNO
Animals	Male		Animals	Female
1#	0.126671		1#	0.0944071
2#	0.0970724		2#	0.0123013
3#	0.0594293		3#	0.1788
4#	0.109161		4#	0.120031
5#	0.134281		5#	-0.0318816
6#	-0.00932164		6#	-0.011239
MDL 100907 + Saline
Animals	Male		Animals	Animals
1#	0.257178		1#	0.23321
2#	0.276121		2#	0.346548
3#	0.370179		3#	0.327836
4#	0.205354		4#	0.49804
5#	0.21131		5#	0.171771
6#	0.328659		6#	0.0938097
MDL 100907 + CNO
Animals	Male		Animals	Animals
1#	0.124588		1#	0.11419
2#	0.0252262		2#	-0.0171049
3#	0.13883		3#	0.175509
4#	0.0246329		4#	0.25643
5#	0.157412		5#	0.0711749
6#	0.095877		6#	0.066642

## Sheet: Figure 6H
Open-field test
Vehicle + Saline
Male			Female
Animals	Percent time in central area	Distance traveled	Animals	Percent time in central area	Distance traveled
1	22.6033	2913.02	1	12.41	1595.53
2	19.8967	2602.67	2	11.5233	2538.69
3	14.69	2830.96	3	4.94333	1908.8
4	21.1067	1413.79	4	15.58	2616.87
5	21.4833	2107.82	5	13.63	2519.24
6	9.82	3422.21	6	16.8167	4106.39
Vehicle + CNO
Male			Female
Animals	Percent time in central area	Distance traveled	Animals	Percent time in central area	Distance traveled
1	15.3567	1786.38		14.1933	2594.28
2	11.43	3089.63		9.95667	1268.7
3	9.57	3359.18		17.45	2687.28
4	12.8733	1502.36		20.6933	1542.58
5	10.0567	2415.96		5.63333	3908.7
6	15.63	1729.63		7.96333	2706.99
MDL 100907 + Saline
Male			Female
Animals	Percent time in central area	Distance traveled	Animals	Percent time in central area	Distance traveled
1	19.1	4251.29		18.44	3468.73
2	13.6967	2918.98		9.75	1918.4
3	6.22333	3474.91		5.78	2415.62
4	27.8133	2784.78		7.69667	3968.69
5	26.85	5330.2		13.0467	2156.48
6	17.6767	1450.79		12.9733	2149.26
MDL 100907 + CNO
Male			Female
Animals	Percent time in central area	Distance traveled	Animals	Percent time in central area	Distance traveled
1	7.5	3377.31		10.7233	3251.05
2	14.11	3082.2		20.61	1587.41
3	16.17	2303.06		10.6433	1971.36
4	22.62	1847.57		15.6233	3352.63
5	21.24	2923.84		18.4867	3281.65
6	9.79667	4025.6		19.23	3319.46
