# Supplementary material for: Dorsal raphe nucleus to anterior cingulate cortex 5-HTergic neural circuit modulates consolation and sociability
Source: eLife journal article supplement (doi:10.7554/elife.67638), 2021-06-03
Supplement: figures [file elife-67638-figures-v2.pdf]

---

## Figures and figure supplements

Dorsal raphe nucleus to anterior cingulate cortex 5-HTergic neural circuit modulates consolation and sociability

**Laifu Li et al**

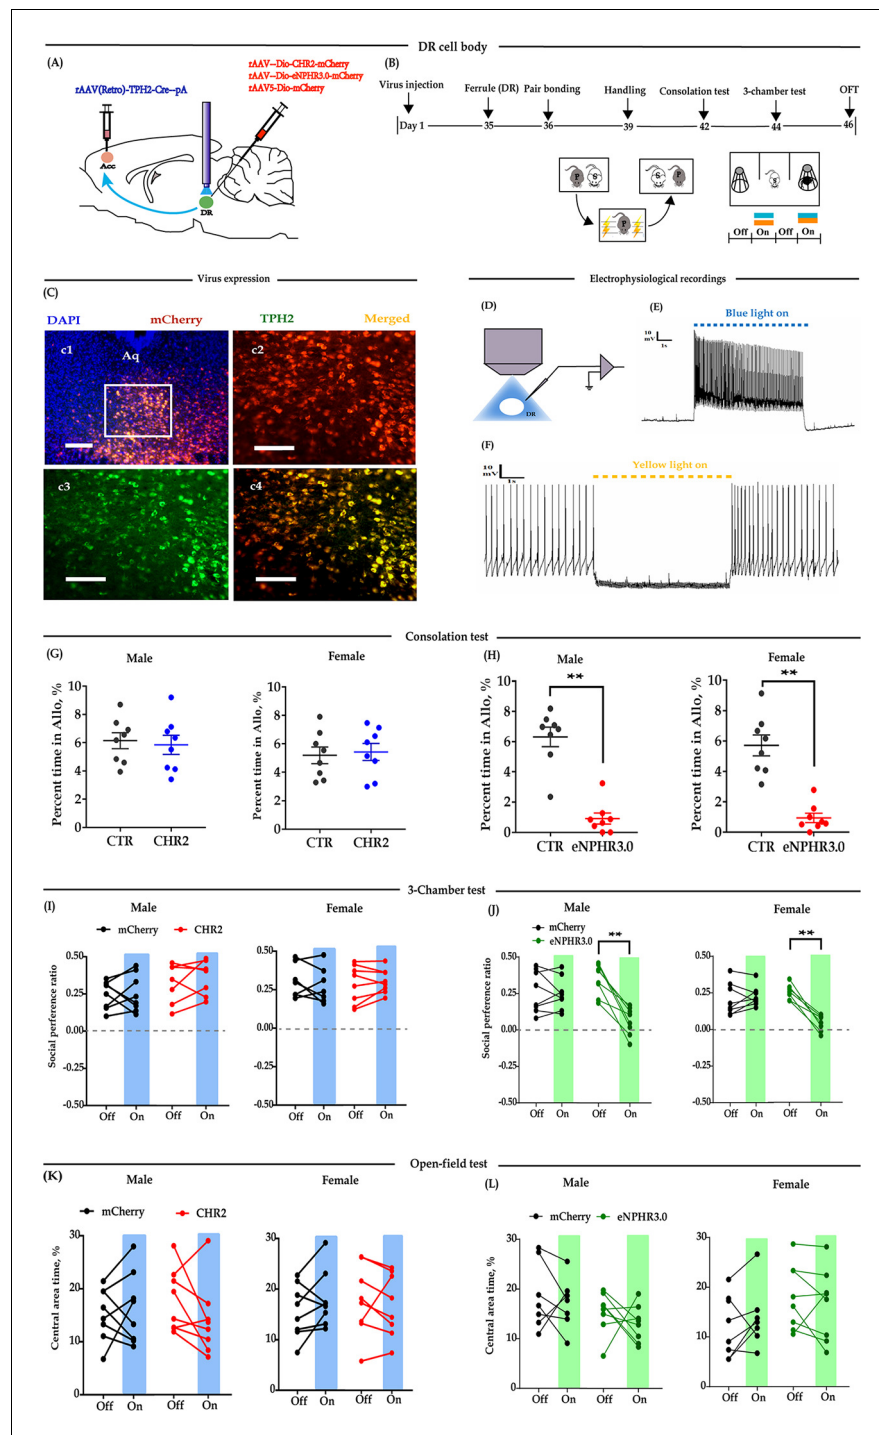

**Figure 1.** Optogenetic bidirectional modulation of 5-HT neuron in the DR in the DR-ACC neural circuit. (A) Schematic of optogenetic manipulation. (B) Timeline of experiments. (C) Immunohistological image showing virus expression in the DR (c1) and amplified images in the left box showing the mCherry, TPH2, and the colocalization of the two ('c2-c4'). (D) Electrophysiological recording model. (E and F) Representative traces from electrophysiological recordings showing photostimulation (E) and photoinhibition of a 5-HT neuron (F). (G) Quantification of allogrooming time in the consolation test of the CHR2 and control animals ( $n = 8$  in each group; CHR2 vs CTR, independent samples  $t$ -test and Bayesian independent samples  $t$ -test; male:  $t_{(14)} = 0.340$ ,  $p = 0.739$ ,  $BF_{+0} = 0.445$  with median posterior  $\delta = 0.104$ , 95% CI =  $[-0.673$  to  $0.930]$ ; female:  $t_{(14)} = -0.279$ ,  $p = 0.785$ ,  $BF_{+0} = 0.439$  with median posterior  $\delta = -0.085$ , 95% CI =  $[-0.906$  to  $0.694]$ ). (H) Quantification of allogrooming time in the 3-Chamber test. (I) Quantification of social preference ratio in the 3-Chamber test. (J) Quantification of social preference ratio in the 3-Chamber test. (K) Quantification of central area time in the Open-field test. (L) Quantification of central area time in the Open-field test.

Figure 1 continued

consolation test of the eNPHR3.0 and control animals ( $n = 8$  in each group; CHR2 vs eNPHR3.0, independent samples  $t$ -test and Bayesian independent samples  $t$ -test; male:  $t_{(14)} = 7.293$ ,  $p < 0.001$ ,  $BF_{+0} = 6000.583$ ; female:  $t_{(14)} = 6.327$ ,  $p < 0.001$ ,  $BF_{+0} = 1562.921$ ). (I) Quantification of social preference ratio in the three-chamber test of the CHR2 and control animals ( $n = 7$  in CHR2 groups, one male and one female were excluded from analysis due to immobility;  $n = 8$  in CTR groups; two-way repeated measures ANOVA along with two-way Bayesian repeated measures ANOVA; male: group:  $F_{(1, 13)} = 3.042$ ,  $p = 0.105$ ,  $BF_{(incl)} = 1.184$ ; light:  $F_{(1, 13)} = 0.531$ ,  $p = 0.479$ ,  $BF_{(incl)} = 0.425$ ; group  $\times$  light:  $F_{(1, 13)} = 0.246$ ,  $p = 0.628$ ,  $BF_{(incl)} = 0.479$ ; female: group:  $F_{(1, 13)} = 2.088$ ,  $p = 0.172$ ,  $BF_{(incl)} = 0.790$ ; light:  $F_{(1, 13)} = 0.180$ ,  $p = 0.678$ ,  $BF_{(incl)} = 0.426$ ; group  $\times$  light:  $F_{(1, 13)} = 0.233$ ,  $p = 0.638$ ,  $BF_{(incl)} = 0.358$ ). (J) Quantification of social preference ratio in the three-chamber test of the eNPHR3.0 and control animals ( $n = 8$  in each group; two-way repeated measures ANOVA along with two-way Bayesian repeated measures ANOVA; male: group:  $F_{(1, 14)} = 4.084$ ,  $p = 0.063$ ,  $BF_{(incl)} = 1.236$ ; light:  $F_{(1, 14)} = 28.361$ ,  $p < 0.001$ ,  $BF_{(incl)} = 25.390$ ; group  $\times$  light:  $F_{(1, 14)} = 22.959$ ,  $p < 0.001$ ,  $BF_{(incl)} = 87.850$ ; post-hoc comparisons (Tukey): mCherry\_Off vs mCherry\_On,  $p = 0.981$ ; eNPHR\_Off vs eNPHR\_On,  $p < 0.001$ ; female: group:  $F_{(1, 14)} = 11.892$ ,  $p = 0.004$ ,  $BF_{(incl)} = 4.965$ ; light:  $F_{(1, 14)} = 22.678$ ,  $p < 0.001$ ,  $BF_{(incl)} = 7.067$ ; group  $\times$  light:  $F_{(1, 14)} = 33.771$ ,  $p < 0.001$ ,  $BF_{(incl)} = 623.339$ ; post-hoc comparisons (Tukey): mCherry\_Off vs mCherry\_On,  $p = 0.879$ ; eNPHR\_Off vs eNPHR\_On,  $p < 0.001$ ). (K) Quantification of time spent in the central area in the open-field test of the CHR2 and control animals ( $n = 8$  in each group; two-way repeated measures ANOVA along with two-way Bayesian repeated measures ANOVA; male: group:  $F_{(1, 14)} = 0.009$ ,  $p = 0.465$ ,  $BF_{(incl)} = 1.184$ ; light:  $F_{(1, 14)} = 0.808$ ,  $p = 0.384$ ,  $BF_{(incl)} = 0.442$ ; group  $\times$  light:  $F_{(1, 14)} = 2.266$ ,  $p = 0.155$ ,  $BF_{(incl)} = 0.964$ ; female: group:  $F_{(1, 14)} = 0.240$ ,  $p = 0.632$ ,  $BF_{(incl)} = 0.602$ ; light:  $F_{(1, 14)} = 0.341$ ,  $p = 0.568$ ,  $BF_{(incl)} = 0.371$ ; group  $\times$  light:  $F_{(1, 14)} = 2.192$ ,  $p = 0.161$ ,  $BF_{(incl)} = 0.910$ ). (L) Quantification of time spent in the central area in the open-field test of the eNPHR3.0 and control animals (male\_mCherry,  $n = 7$  (one was excluded from analysis due to immobility); male\_eNPHR3.0,  $n = 8$ ; female\_mCherry,  $n = 8$ ; male\_eNPHR3.0,  $n = 8$ ; two-way repeated measures ANOVA along with two-way Bayesian repeated measures ANOVA; male: group:  $F_{(1, 13)} = 6.326$ ,  $p = 0.026$ ,  $BF_{(incl)} = 1.935$ ; light:  $F_{(1, 13)} = 1.176$ ,  $p = 0.298$ ,  $BF_{(incl)} = 0.605$ ; group  $\times$  light:  $F_{(1, 13)} = 0.039$ ,  $p = 0.846$ ,  $BF_{(incl)} = 0.578$ ; post-hoc comparisons (Tukey): mCherry\_Off vs mCherry\_On,  $p = 0.928$ ; eNPHR\_Off vs eNPHR\_On,  $p = 0.785$ ; female: group:  $F_{(1, 14)} = 0.794$ ,  $p = 0.388$ ,  $BF_{(incl)} = 0.660$ ; light:  $F_{(1, 14)} = 0.632$ ,  $p = 0.440$ ,  $BF_{(incl)} = 0.402$ ; group  $\times$  light:  $F_{(1, 14)} = 3.390$ ,  $p = 0.087$ ,  $BF_{(incl)} = 1.352$ ; post-hoc comparisons (Tukey): mCherry\_Off vs mCherry\_On,  $p = 0.928$ ; eNPHR\_Off vs eNPHR\_On,  $p = 0.785$ ). Scale bars, 100  $\mu\text{m}$ . Error bars are  $\pm$  SEM. \*\* $p < 0.01$ . For raw data in this figure, please refer to **Figure 1—source data 1**. ACC: anterior cingulate cortex; Aq: aqueduct; ANOVA: analysis of variance; CTR: control; DR: dorsal raphe nucleus; TPH2: tryptophan hydroxylase 2; 5-HT: serotonin.

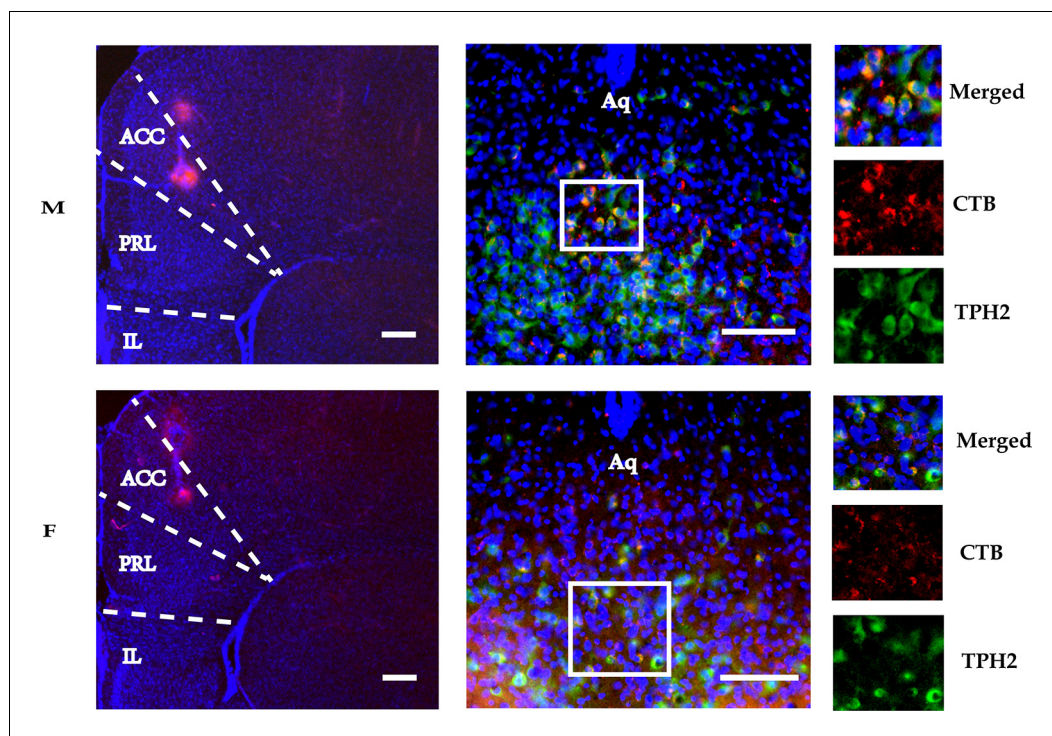

**Figure 1—figure supplement 1.** The histology of CTB injecting into the right ACC of male (upper row) and female voles (lower row). The right panels show colocalization of TPH2<sup>+</sup> neurons (green) and CTB (red) in the DR. Scale bars, 100  $\mu$ m. M: male; F: female; ACC: anterior cingulate cortex; DR: dorsal raphe nucleus; TPH2: tryptophan hydroxylase 2; Aq: aqueduct.



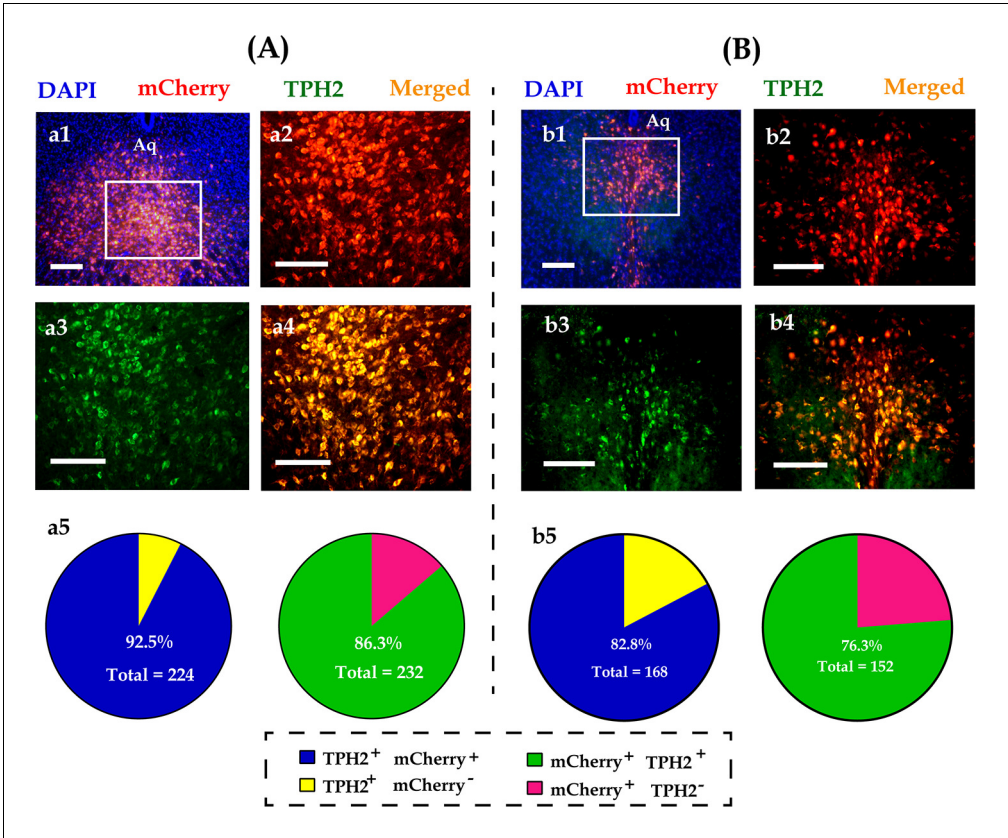

**Figure 1—figure supplement 2.** Immunohistological images showing colocalization of opsins (mCherry, red), TPH2+ neurons (green), and DAPI (blue) in the DR of male (A) and (B) female voles. (a1 and b1): Merged image of DAPI and mCherry; (a2–a4, b2–b4): amplified images in the left box showing the mCherry, TPH2, and the colocalization of mCherry and TPH2; (a5, b5): quantification rates of mCherry neurons colabeled with TPH2 (left pies) and TPH2 neurons colabeled with mCherry (right pies);  $n = 3$  in each sex. Scale bars, 100  $\mu\text{m}$ . Aq: aqueduct; DR: dorsal raphe nucleus; TPH2: tryptophan hydroxylase 2; DAPI: 4',6-diamidino-2-phenylindole.

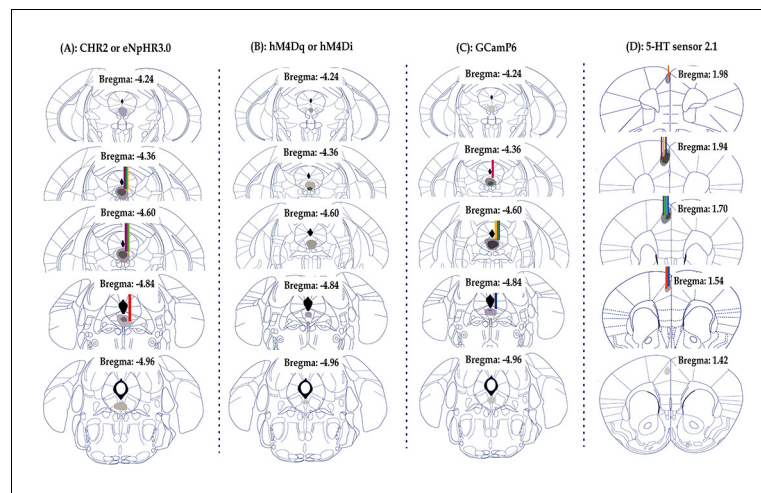

**Figure 1—figure supplement 3.** Schematics depicting virus spread (shades) and optic fiber placements (lines) for recording and functional manipulation experiments, related to **Figures 1, 3, 4** and **5** (A, B, C, and D, respectively).

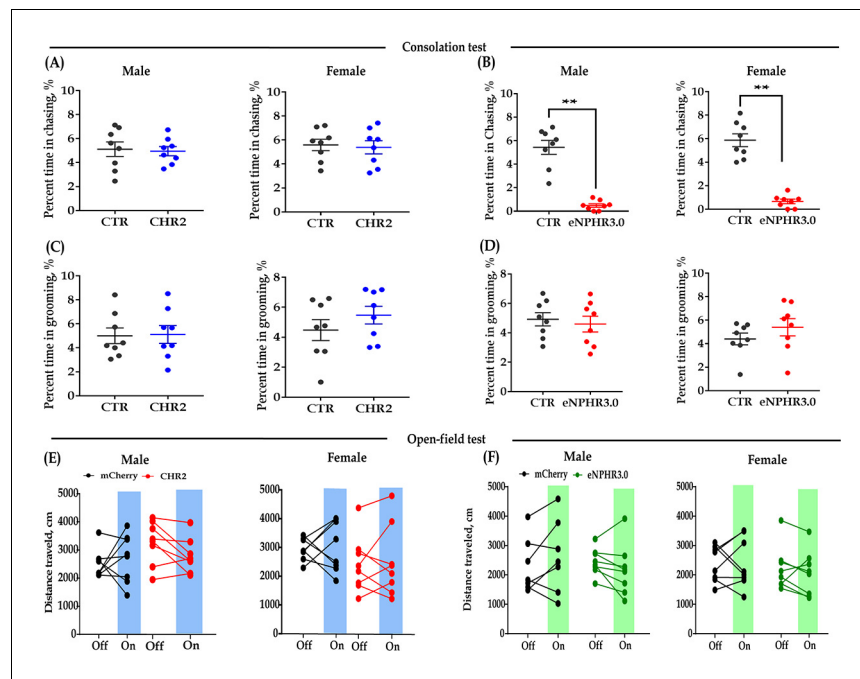

**Figure 1—figure supplement 4.** Effect of bidirectional optogenetic modulation of DR 5-HT neuron activities in the DR-ACC neural circuit on some control behaviors. (A) Quantification of chasing time in the consolation test of the CHR2 and control animals ( $n = 8$  in each group; independent samples  $t$ -test and Bayesian independent samples  $t$ -test, two tailed; male:  $t_{(14)} = 0.224$ ,  $p = 0.826$ ,  $BF_{+0} = 0.435$  with median posterior  $\delta = 0.068$ , 95% CI =  $[-0.714$  to  $0.884]$ ; female:  $t_{(14)} = 0.277$ ,  $p = 0.786$ ,  $BF_{+0} = 0.439$  with median posterior  $\delta = 0.084$ , 95% CI =  $[-0.695$  to  $0.905]$ ). (B) Quantification of chasing time in the consolation test of the eNPHR3.0 and control animals ( $N = 8$  in each group; independent samples  $t$ -test and Bayesian independent samples  $t$ -test, one tailed; male:  $t_{(14)} = 8.086$ ,  $p < 0.001$ ,  $BF_{+0} = 16993.904$ ; female:  $t_{(14)} = -1.092$ ,  $p = 0.293$ ,  $BF_{+0} = 53961.336$ ). (C) Quantification of selfgrooming time in the consolation test of the CHR2 and control animals ( $n = 8$  in each group; independent samples  $t$ -test and Bayesian independent samples  $t$ -test, two-tailed; male:  $t_{(14)} = -0.114$ ,  $p = 0.911$ ,  $BF_{+0} = 0.430$  with median posterior  $\delta = -0.035$ , 95% CI =  $[-0.840$  to  $0.754]$ ; female:  $t_{(14)} = -1.092$ ,  $p = 0.293$ ,  $BF_{+0} = 0.635$  with median posterior  $\delta = -0.345$ , 95% CI =  $[-1.268$  to  $0.431]$ ). (D) Quantification of selfgrooming time in the consolation test of the eNPHR3.0 and control animals ( $n = 8$  in each group; independent samples  $t$ -test and Bayesian independent samples  $t$ -test, two-tailed; male:  $t_{(14)} = 0.470$ ,  $p = 0.645$ ,  $BF_{+0} = 0.596$  with median posterior  $\delta = 0.325$ , 95% CI =  $[0.016$  to  $1.701]$ ; female:  $t_{(14)} = -1.118$ ,  $p = 0.282$ ,  $BF_{+0} = 0.245$  with median posterior  $\delta = 0.168$ , 95% CI =  $[0.007$  to  $0.689]$ ). (E) Quantification of total distance traveled in the 5-min open-field test of the CHR2 and control animals ( $n = 8$  in each group; two-way repeated measures ANOVA along with two-way Bayesian repeated measures ANOVA; male: group:  $F_{(1, 14)} = 0.024$ ,  $p = 0.878$ ,  $BF_{(incl)} = 0.435$ ; light:  $F_{(1, 14)} = 0.359$ ,  $p = 0.558$ ,  $BF_{(incl)} = 0.384$ ; group  $\times$  light:  $F_{(1, 14)} = 2.266$ ,  $p = 0.154$ ,  $BF_{(incl)} = 1.062$ ; female: group:  $F_{(1, 14)} = 1.828$ ,  $p = 0.198$ ,  $BF_{(incl)} = 0.831$ ; light:  $F_{(1, 14)} = 0.156$ ,  $p = 0.36099$ ,  $BF_{(incl)} = 0.360$ ; group  $\times$  light:  $F_{(1, 14)} = 1.769e^{-4}$ ,  $p = 0.990$ ,  $BF_{(incl)} = 0.447$ ). (F) Quantification of total distance traveled in the 5-min open-field test of the eNPHR3.0 and control animals (male\_mCherry,  $n = 7$  (one was excluded from analysis due to immobility); male\_eNPHR3.0,  $n = 8$ ; female\_mCherry,  $n = 8$ ; male\_eNPHR3.0,  $n = 8$ ; two-way repeated measures ANOVA along with two-way Bayesian repeated measures ANOVA; male: group:  $F_{(1, 13)} = 0.049$ ,  $p = 0.827$ ,  $BF_{(incl)} = 0.582$ ; light:  $F_{(1, 13)} = 0.011$ ,  $p = 0.918$ ,  $BF_{(incl)} = 0.338$ ; group  $\times$  light:  $F_{(1, 13)} = 3.518$ ,  $p = 0.083$ ,  $BF_{(incl)} = 1.330$ ; female: group:  $F_{(1, 14)} = 0.261$ ,  $p = 0.618$ ,  $BF_{(incl)} = 0.569$ ; light:  $F_{(1, 14)} = 0.251$ ,  $p = 0.624$ ,  $BF_{(incl)} = 0.363$ ; group  $\times$  light:  $F_{(1, 14)} = 0.339$ ,  $p = 0.569$ ,  $BF_{(incl)} = 0.469$ ). Data are presented as mean  $\pm$  SE, \*\* $p < 0.01$ . For raw data, please refer to **Figure 1—figure supplement 4—source data 1**. ACC: anterior cingulate cortex; ANOVA: analysis of variance; CTR: control; DR: dorsal raphe nucleus; 5-HT: serotonin.

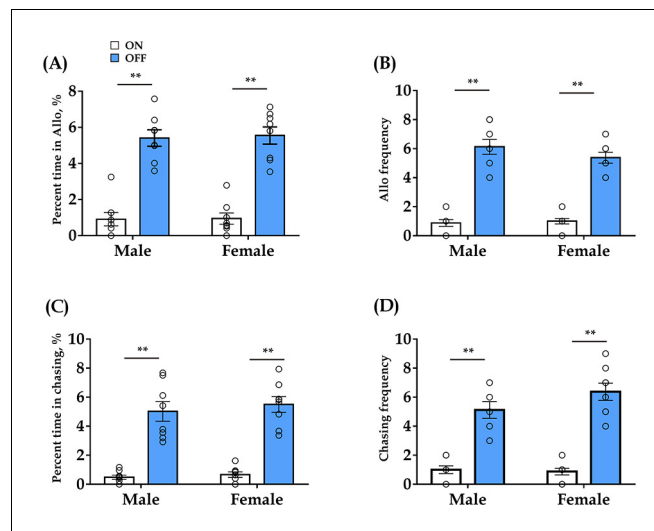

**Figure 1—figure supplement 5.** Effect of optogenetic inhibition of DR 5-HT neurons in the DR-ACC neural circuit does not elicit long-lasting effects (< 24 hr) on allogrooming and chasing behavior in the consolation test. (A) Time spent in allogrooming (male:  $t_{(7)} = -11.707$ ,  $p < 0.001$ ,  $BF_{+0} = 142.924$ ; female:  $t_{(7)} = -7.427$ ,  $p < 0.001$ ,  $BF_{+0} = 400.207$ ). (B) Allogrooming frequency (male:  $t_{(7)} = -8.104$ ,  $p < 0.001$ ,  $BF_{+0} = 634.047$ ; female:  $t_{(7)} = -9.501$ ,  $p < 0.001$ ,  $BF_{+0} = 318.031$ ). (C) Time spent in chasing (male:  $t_{(7)} = -6.063$ ,  $p < 0.001$ ,  $BF_{+0} = 435.381$ ; female:  $t_{(14)} = -7.548$ ,  $p < 0.001$ ,  $BF_{+0} = 4796.167$ ). (D) Chasing frequency (male:  $t_{(7)} = -7.105$ ,  $p < 0.001$ ,  $BF_{+0} = 4796.167$ ; female:  $t_{(14)} = -8.072$ ,  $p < 0.001$ ,  $BF_{+0} = 620.600$ ). The data for 'light on' are derived from 'Figure 1H'.  $N = 8$  in each group. Paired sample  $t$ -test and Bayesian paired samples  $t$ -test, one-tailed. Data are presented as mean  $\pm$  SE, \*\* $p < 0.01$ . For raw data, please refer to Figure 1—figure supplement 5—source data 1. ACC: anterior cingulate cortex; DR: dorsal raphe nucleus; CTR: control; 5-HT: serotonin.

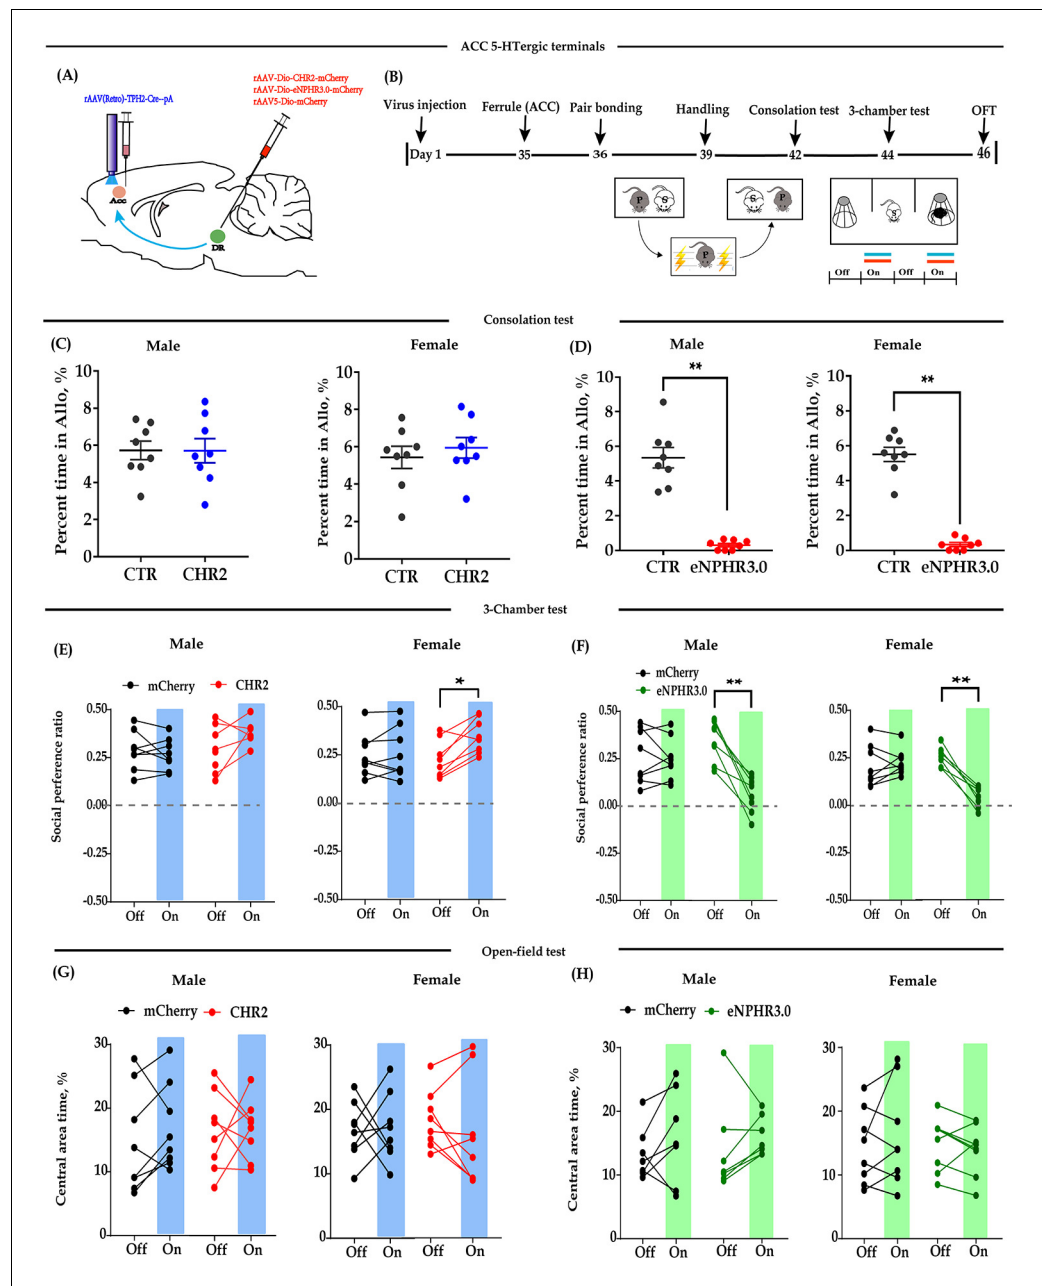

**Figure 2.** Optogenetic bidirectional modulation of 5-HT terminals within the ACC in the DR-ACC neural circuit. (A) Schematic of optogenetic manipulation. (B) Timeline of experiments. (C) Quantification of time spent in allogrooming in the consolation test of the CHR2 and control animals ( $n = 8$  in each group; CHR2 vs CTR, independent samples  $t$ -test and Bayesian independent samples  $t$ -test; male:  $t_{(14)} = 0.011$ ,  $p = 0.992$ ,  $BF_{+0} = 0.428$  with median posterior  $\delta = 0.003$ , 95% CI =  $[-0.792$  to  $0.800]$ ; female:  $t_{(14)} = -0.630$ ,  $p = 0.539$ ,  $BF_{+0} = 0.489$  with median posterior  $\delta = -0.194$ , 95% CI =  $[-1.054$  to  $0.575]$ ). (D) Quantification of time spent in allogrooming in the consolation test of the eNPHR3.0 and control animals ( $n = 8$  in each group; CHR2 vs CTR, independent samples  $t$ -test and Bayesian independent samples  $t$ -test; male:  $t_{(14)} = 8.44$ ,  $p < 0.001$ ,  $BF_{+0} = 26556.455$ ; female:  $t_{(14)} = 12.174$ ,  $p < 0.001$ ,  $BF_{+0} = 1.577 \times 10^6$ ). (E) Quantification of social preference ratio in the three-chamber test of the CHR2 and control animals ( $n = 8$  in each group; two-way repeated measures ANOVA along with two-way Bayesian repeated measures ANOVA; male: group:  $F_{(1, 14)} = 0.443$ ,  $p = 0.516$ ,  $BF_{(incl)} = 0.624$ ; light:  $F_{(1, 14)} = 5.764$ ,  $p = 0.031$ ,  $BF_{(incl)} = 1.763$ ; group  $\times$  light:  $F_{(1, 14)} = 3.556$ ,  $p = 0.080$ ,  $BF_{(incl)} = 1.239$ ; female: group:  $F_{(1, 14)} = 3.985$ ,  $p = 0.066$ ,  $BF_{(incl)} = 1.151$ ; light:  $F_{(1, 14)} = 3.704$ ,  $p = 0.075$ ,  $BF_{(incl)} = 1.097$ ; group  $\times$  light:  $F_{(1, 14)} = 6.297$ ,  $p = 0.025$ ,  $BF_{(incl)} = 4.186$ ; post-hoc comparisons (Tukey): mCherry\_Off vs mCherry\_On,  $p = 0.975$ ; CHR2\_Off vs CHR2\_On,  $p = 0.033$ ). (F) Quantification of social preference ratio in the three-chamber test of the eNPHR3.0 and control animals ( $n = 8$  in each group; two-way repeated measures ANOVA along with two-way Bayesian repeated measures ANOVA; male: group:  $F_{(1, 14)} = 0.443$ ,  $p = 0.516$ ,  $BF_{(incl)} = 0.624$ ; light:  $F_{(1, 14)} = 5.764$ ,  $p = 0.031$ ,  $BF_{(incl)} = 1.763$ ; group  $\times$  light:  $F_{(1, 14)} = 3.556$ ,  $p = 0.080$ ,  $BF_{(incl)} = 1.239$ ; female: group:  $F_{(1, 14)} = 3.985$ ,  $p = 0.066$ ,  $BF_{(incl)} = 1.151$ ; light:  $F_{(1, 14)} = 3.704$ ,  $p = 0.075$ ,  $BF_{(incl)} = 1.097$ ; group  $\times$  light:  $F_{(1, 14)} = 6.297$ ,  $p = 0.025$ ,  $BF_{(incl)} = 4.186$ ; post-hoc comparisons (Tukey): mCherry\_Off vs mCherry\_On,  $p = 0.975$ ; CHR2\_Off vs CHR2\_On,  $p = 0.033$ ). (G) Quantification of central area time in the open-field test of the CHR2 and control animals ( $n = 8$  in each group; two-way repeated measures ANOVA along with two-way Bayesian repeated measures ANOVA; male: group:  $F_{(1, 14)} = 0.443$ ,  $p = 0.516$ ,  $BF_{(incl)} = 0.624$ ; light:  $F_{(1, 14)} = 5.764$ ,  $p = 0.031$ ,  $BF_{(incl)} = 1.763$ ; group  $\times$  light:  $F_{(1, 14)} = 3.556$ ,  $p = 0.080$ ,  $BF_{(incl)} = 1.239$ ; female: group:  $F_{(1, 14)} = 3.985$ ,  $p = 0.066$ ,  $BF_{(incl)} = 1.151$ ; light:  $F_{(1, 14)} = 3.704$ ,  $p = 0.075$ ,  $BF_{(incl)} = 1.097$ ; group  $\times$  light:  $F_{(1, 14)} = 6.297$ ,  $p = 0.025$ ,  $BF_{(incl)} = 4.186$ ; post-hoc comparisons (Tukey): mCherry\_Off vs mCherry\_On,  $p = 0.975$ ; CHR2\_Off vs CHR2\_On,  $p = 0.033$ ). (H) Quantification of central area time in the open-field test of the eNPHR3.0 and control animals ( $n = 8$  in each group; two-way repeated measures ANOVA along with two-way Bayesian repeated measures ANOVA; male: group:  $F_{(1, 14)} = 0.443$ ,  $p = 0.516$ ,  $BF_{(incl)} = 0.624$ ; light:  $F_{(1, 14)} = 5.764$ ,  $p = 0.031$ ,  $BF_{(incl)} = 1.763$ ; group  $\times$  light:  $F_{(1, 14)} = 3.556$ ,  $p = 0.080$ ,  $BF_{(incl)} = 1.239$ ; female: group:  $F_{(1, 14)} = 3.985$ ,  $p = 0.066$ ,  $BF_{(incl)} = 1.151$ ; light:  $F_{(1, 14)} = 3.704$ ,  $p = 0.075$ ,  $BF_{(incl)} = 1.097$ ; group  $\times$  light:  $F_{(1, 14)} = 6.297$ ,  $p = 0.025$ ,  $BF_{(incl)} = 4.186$ ; post-hoc comparisons (Tukey): mCherry\_Off vs mCherry\_On,  $p = 0.975$ ; CHR2\_Off vs CHR2\_On,  $p = 0.033$ ). Figure 2 continued on next page

Figure 2 continued

animals ( $n = 8$  in each group; two-way repeated measures ANOVA along with two-way Bayesian repeated measures ANOVA; male: group:  $F_{(1, 14)} = 9.763$ ,  $p = 0.007$ ,  $BF_{(incl)} = 3.374$ ; light:  $F_{(1, 14)} = 13.168$ ,  $p = 0.003$ ,  $BF_{(incl)} = 9.588$ ; group  $\times$  light:  $F_{(1, 14)} = 10.843$ ,  $p = 0.005$ ,  $BF_{(incl)} = 13.892$ ; post-hoc comparisons (Tukey): mCherry\_Off vs mCherry\_On,  $p = 0.995$ ; eNPHR\_Off vs eNPHR\_On,  $p = 0.001$ ; female: group:  $F_{(1, 14)} = 6.912$ ,  $p = 0.020$ ,  $BF_{(incl)} = 1.545$ ; light:  $F_{(1, 14)} = 93.330$ ,  $p < 0.001$ ,  $BF_{(incl)} = 423.687$ ; group  $\times$  light:  $F_{(1, 14)} = 65.062$ ,  $p < 0.001$ ,  $BF_{(incl)} = 20440.982$ ; post-hoc comparisons (Tukey): mCherry\_Off vs mCherry\_On,  $p = 0.679$ ; eNPHR\_Off vs eNPHR\_On,  $p < 0.001$ ). (G) Quantification of time spent in the central area in the open-field test of the CHR2 and control animals ( $n = 8$  in each group; two-way repeated measures ANOVA along with two-way Bayesian repeated measures ANOVA; male: group:  $F_{(1, 14)} = 4.189 \times 10^{-4}$ ,  $p = 0.984$ ,  $BF_{(incl)} = 0.483$ ; light:  $F_{(1, 14)} = 0.842$ ,  $p = 0.374$ ,  $BF_{(incl)} = 0.489$ ; group  $\times$  light:  $F_{(1, 14)} = 0.501$ ,  $p = 0.491$ ,  $BF_{(incl)} = 0.486$ ; female: group:  $F_{(1, 14)} = 0.014$ ,  $p = 0.906$ ,  $BF_{(incl)} = 0.457$ ; light:  $F_{(1, 14)} = 0.050$ ,  $p = 0.826$ ,  $BF_{(incl)} = 0.335$ ; group  $\times$  light:  $F_{(1, 14)} = 0.177$ ,  $p = 0.681$ ,  $BF_{(incl)} = 0.440$ ). (H) Quantification of time spent in the central area in the open-field test of the eNPHR3.0 and control animals (male:  $n = 7$ , two animals (one from each group) were excluded from analysis due to immobility; female  $n = 8$ ; two-way repeated measures ANOVA along with two-way Bayesian repeated measures ANOVA; male: group:  $F_{(1, 12)} = 0.091$ ,  $p = 0.769$ ,  $BF_{(incl)} = 0.566$ ; light:  $F_{(1, 12)} = 8.130$ ,  $p = 0.015$ ,  $BF_{(incl)} = 4.162$ ; group  $\times$  light:  $F_{(1, 12)} = 0.802$ ,  $p = 0.388$ ,  $BF_{(incl)} = 0.550$ ; post-hoc comparisons (Tukey): mCherry\_Off vs mCherry\_On,  $p = 0.532$ ; eNPHR\_Off vs eNPHR\_On,  $p = 0.086$ ; female: group:  $F_{(1, 14)} = 0.276$ ,  $p = 0.607$ ,  $BF_{(incl)} = 0.578$ ; light:  $F_{(1, 14)} = 0.580$ ,  $p = 0.459$ ,  $BF_{(incl)} = 0.404$ ; group  $\times$  light:  $F_{(1, 14)} = 2.234$ ,  $p = 0.157$ ,  $BF_{(incl)} = 0.871$ ). Error bars are  $\pm$  SEM. \* $p < 0.05$ , \*\* $p < 0.01$ . For raw data in this figure, please refer to **Figure 2—source data 1**. ACC: anterior cingulate cortex; ANOVA: analysis of variance; DR: dorsal raphe nucleus; CTR: control; 5-HT: serotonin.



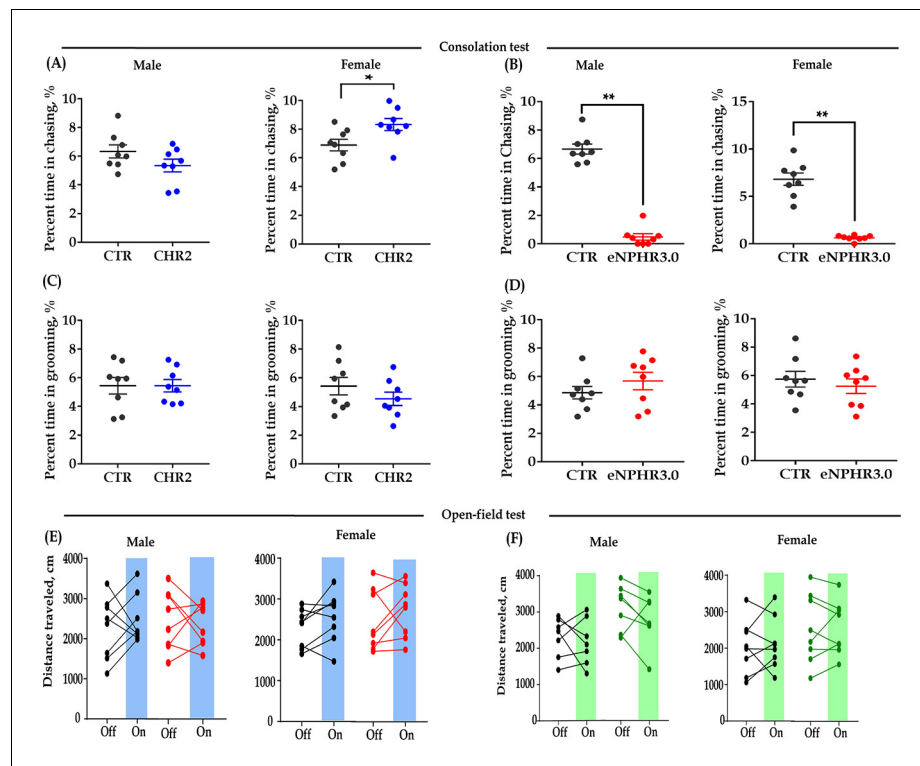

**Figure 2—figure supplement 1.** Effect of bidirectional optogenetic modulation of ACC 5-HT terminals in the DR-ACC neural circuit on some control behaviors. (A) Quantification of chasing time in the consolation test of the CHR2 and control animals ( $n = 8$  in each group; independent samples  $t$ -test and Bayesian independent samples  $t$ -test, two-tailed; male:  $t_{(14)} = 1.542$ ,  $p = 0.145$ ,  $BF_{+0} = 0.920$  with median posterior  $\delta = 0.506$ , 95% CI =  $[-0.301$  to  $1.496]$ ; female:  $t_{(14)} = -2.458$ ,  $p = 0.028$ ,  $BF_{+0} = 2.585$  with median posterior  $\delta = -0.884$ , 95% CI =  $[-2.006$  to  $0.050]$ ). (B) Quantification of chasing time in the consolation test of the eNPHR3.0 and control animals ( $n = 8$  in each group; independent samples  $t$ -test and Bayesian independent samples  $t$ -test, two-tailed; male:  $t_{(14)} = 14.635$ ,  $p < 0.001$ ,  $BF_{+0} = 1.407e+7$ ; female:  $t_{(14)} = 9.384$ ,  $p < 0.001$ ,  $BF_{+0} = 82683.230$ ). (C) Quantification of selfgrooming time in the consolation test of the CHR2 and control animals ( $n = 8$  in each group; independent samples  $t$ -test and Bayesian independent samples  $t$ -test, two-tailed; male:  $t_{(14)} = 8.651e^{-4}$ ,  $p = 0.999$ ,  $BF_{+0} = 0.428$  with median posterior  $\delta = 0.000$ , 95% CI =  $[-0.796$  to  $0.797]$ ; female:  $t_{(14)} = 1.145$ ,  $p = 0.271$ ,  $BF_{+0} = 0.660$  with median posterior  $\delta = 0.364$ , 95% CI =  $[-0.415$  to  $1.294]$ ). (D) Quantification of selfgrooming time in the consolation test of the eNPHR3.0 and control animals ( $n = 8$  in each group; independent samples  $t$ -test and Bayesian independent samples  $t$ -test, two-tailed; male:  $t_{(14)} = -0.438$ ,  $p = 0.668$ ,  $BF_{+0} = 0.332$  with median posterior  $\delta = 0.214$ , 95% CI =  $[0.009$  to  $0.814]$ ; female:  $t_{(14)} = 0.654$ ,  $p = 0.524$ ,  $BF_{+0} = 0.691$  with median posterior  $\delta = 0.357$ , 95% CI =  $[0.019$  to  $1.137]$ ). (E) Quantification of total distance traveled in the 5-min open-field test of the CHR2 and control animals ( $n = 8$  in each group; two-way repeated measures ANOVA along with two-way Bayesian repeated measures ANOVA; male: group:  $F_{(1, 14)} = 1.077$ ,  $p = 0.317$ ,  $BF_{(incl)} = 0.656$ ; light:  $F_{(1, 14)} = 0.076$ ,  $p = 0.787$ ,  $BF_{(incl)} = 0.330$ ; group  $\times$  light:  $F_{(1, 14)} = 0.581$ ,  $p = 0.458$ ,  $BF_{(incl)} = 0.502$ ; female: group:  $F_{(1, 14)} = 0.304$ ,  $p = 0.590$ ,  $BF_{(incl)} = 0.542$ ; light:  $F_{(1, 14)} = 3.241$ ,  $p = 0.093$ ,  $BF_{(incl)} = 1.138$ ; group  $\times$  light:  $F_{(1, 14)} = 0.006$ ,  $p = 0.939$ ,  $BF_{(incl)} = 0.416$ ). (F) Quantification of total distance traveled in the 5-min open-field test of the eNPHR3.0 and control animals (male:  $n = 7$  in each group, two animals (one from each group) were excluded from analysis due to immobility; female:  $n = 8$  in each group; two-way repeated measures ANOVA along with two-way Bayesian repeated measures ANOVA; male: group:  $F_{(1, 12)} = 5.832$ ,  $p = 0.033$ ,  $BF_{(incl)} = 2.450$ ; light:  $F_{(1, 12)} = 1.990$ ,  $p = 0.184$ ,  $BF_{(incl)} = 0.679$ ; group  $\times$  light:  $F_{(1, 12)} = 0.483$ ,  $p = 0.500$ ,  $BF_{(incl)} = 0.540$ ; female: group:  $F_{(1, 14)} = 1.642$ ,  $p = 0.221$ ,  $BF_{(incl)} = 0.857$ ; light:  $F_{(1, 14)} = 0.178$ ,  $p = 0.680$ ,  $BF_{(incl)} = 0.356$ ; group  $\times$  light:  $F_{(1, 14)} = 0.067$ ,  $p = 0.799$ ,  $BF_{(incl)} = 0.417$ ). Data are presented as mean  $\pm$  SE, \*\* $p < 0.01$ . For raw data, please refer to **Figure 2—figure supplement 1—source data 1**. ACC: anterior cingulate cortex; ANOVA: analysis of variance; DR: dorsal raphe nucleus; CTR: control; 5-HT: serotonin.

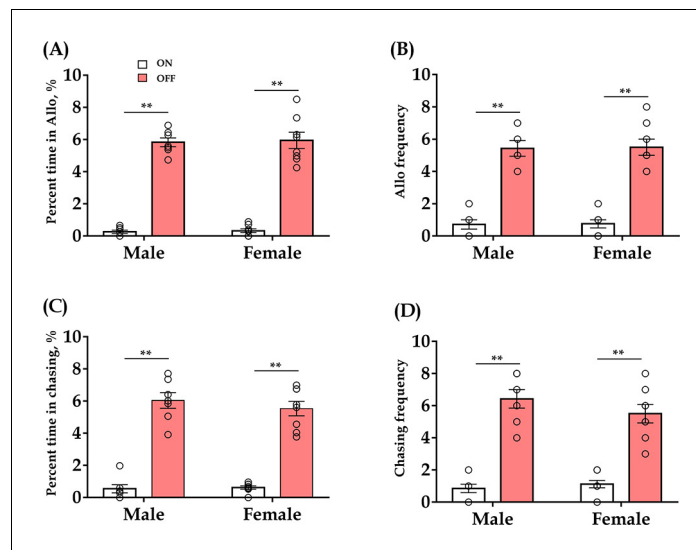

**Figure 2—figure supplement 2.** Effect of optogenetic inhibition of ACC 5-HT terminals in the DR-ACC neural circuit does not elicit long-lasting effects (<24 hr) on allogrooming and chasing behaviors in the consolation test. (A) Time spent in allogrooming (male:  $t_{(6)} = -19.792$ ,  $p < 0.001$ ,  $BF_{+0} = 21609.467$ ; female:  $t_{(7)} = -10.404$ ,  $p < 0.001$ ,  $BF_{+0} = 2475.291$ ). (B) Allogrooming frequency (male:  $t_{(6)} = -11.210$ ,  $p < 0.001$ ,  $BF_{+0} = 1392.685$ ; female:  $t_{(7)} = -7.333$ ,  $p < 0.001$ ,  $BF_{+0} = 374.389$ ). (C) Time spent in chasing (male:  $t_{(6)} = -12.448$ ,  $p < 0.001$ ,  $BF_{+0} = 1144.562$ ; female:  $t_{(7)} = -9.858$ ,  $p < 0.001$ ,  $BF_{+0} = 917.640$ ). (D) Chasing frequency (male:  $t_{(6)} = -9.750$ ,  $p < 0.001$ ,  $BF_{+0} = 362.702$ ; female:  $t_{(7)} = -7.344$ ,  $p < 0.001$ ,  $BF_{+0} = 188.706$ ).  $N = 8$  in each group. The data for 'light on' are derived from 'Figure 2D'. Paired sample t-test and Bayesian paired samples t-test, one-tailed. Data are presented as mean  $\pm$  SE, \*\* $p < 0.01$ . For raw data, please refer to Figure 2—figure supplement 2—source data 1. ACC: anterior cingulate cortex; DR: dorsal raphe nucleus; CTR: control; 5-HT: serotonin.

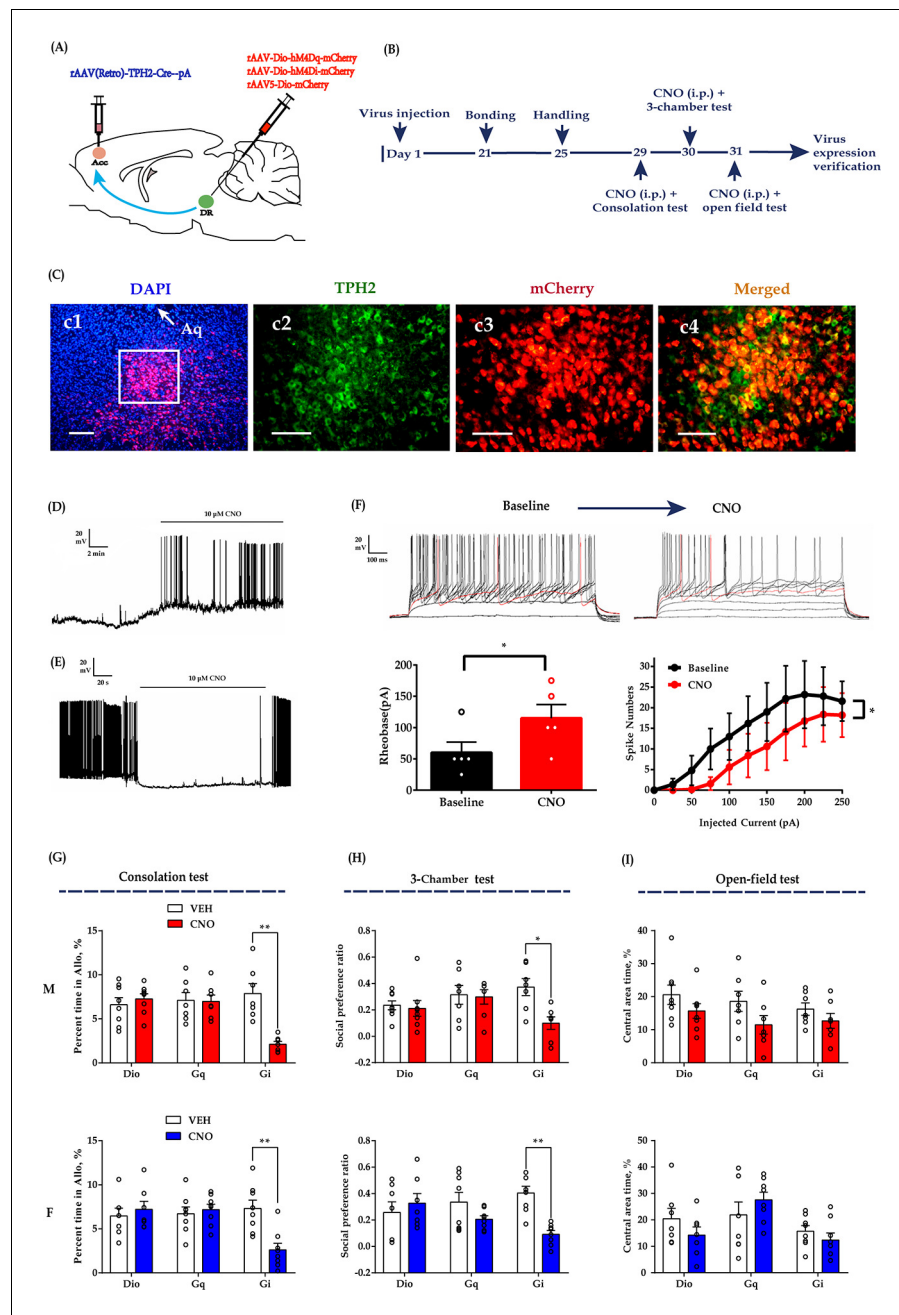

**Figure 3.** Chemogenetic modulation of DR 5-HT neuron activities in the DR-ACC neural circuit. (A) Schematic of chemogenetic manipulations. (B) Timeline of experiments. (C) Immunohistological image showing virus expression in the DR (c1) and amplified images in the left white box showing the mCherry, TPH2, and the colocalization of the two (c2–c4). (D) Representative trace from a Gq-DREADD neuron. (E) Representative trace from a Gi-DREADD-transfected neuron. (F) Quantification of spike rheobase and spike numbers under current step injections in Gi-DREADD-transfected neurons ( $n = 5$  neurons; spike rheobase: paired  $t$ -test,  $t_{(4)} = 4.491$ ,  $p = 0.0109$ ; two-way repeated measures ANOVA; spike numbers: treatment:  $F_{(1, 4)} = 8.734$ ,  $p = 0.0417$ , current:  $F_{(10, 40)} = 8.989$ ,  $p < 0.0001$ ; treatment  $\times$  current:  $F_{(10, 40)} = 4.013$ ,  $p = 0.0008$ ). (G) Quantification of allogrooming time in the consolation test (two-way repeated measures ANOVA along with two-way Bayesian repeated measures ANOVA; male: treatment:  $F_{(1, 19)} = 6.300$ ,  $p = 0.021$ ,  $BF_{(incl)} = 2.007$ ; group:  $F_{(2, 19)} = 5.434$ ,  $p = 0.014$ ,  $BF_{(incl)} = 0.777$ ; treatment  $\times$  group:  $F_{(1, 19)} = 8.433$ ,  $p = 0.002$ ,  $BF_{(incl)} = 215.751$ ; post-hoc comparisons (Tukey): Gi\_Saline vs Gi\_CNO,  $p = 0.002$ ; Gq\_Saline vs Gq\_CNO,  $p = 1$ ; Dio\_Saline vs Dio\_CNO,  $p = 0.991$ ). Female: treatment:  $F_{(1, 20)} = 4.570$ ,  $p = 0.045$ ,  $BF_{(incl)} = 1.120$ ; group:  $F_{(2, 20)} = 2.884$ ,  $p = 0.079$ ,  $BF_{(incl)} = 0.816$ ; treatment  $\times$  group:  $F_{(1, 20)} = 10.778$ ,  $p < 0.001$ ,  $BF_{(incl)} = 154.421$ . Post-hoc comparisons (Tukey): Gi\_Saline vs Gi\_CNO,  $p < 0.001$ ; Gq\_Saline vs Gq\_CNO,  $p < 0.001$ ; Dio\_Saline vs Dio\_CNO,  $p = 0.991$ ). (H) Quantification of social preference ratio in the 3-chamber test (two-way repeated measures ANOVA; male: treatment:  $F_{(1, 19)} = 6.300$ ,  $p = 0.021$ ,  $BF_{(incl)} = 2.007$ ; group:  $F_{(2, 19)} = 5.434$ ,  $p = 0.014$ ,  $BF_{(incl)} = 0.777$ ; treatment  $\times$  group:  $F_{(1, 19)} = 8.433$ ,  $p = 0.002$ ,  $BF_{(incl)} = 215.751$ ; post-hoc comparisons (Tukey): Gi\_Saline vs Gi\_CNO,  $p = 0.002$ ; Gq\_Saline vs Gq\_CNO,  $p = 1$ ; Dio\_Saline vs Dio\_CNO,  $p = 0.991$ ). Female: treatment:  $F_{(1, 20)} = 4.570$ ,  $p = 0.045$ ,  $BF_{(incl)} = 1.120$ ; group:  $F_{(2, 20)} = 2.884$ ,  $p = 0.079$ ,  $BF_{(incl)} = 0.816$ ; treatment  $\times$  group:  $F_{(1, 20)} = 10.778$ ,  $p < 0.001$ ,  $BF_{(incl)} = 154.421$ . Post-hoc comparisons (Tukey): Gi\_Saline vs Gi\_CNO,  $p < 0.001$ ; Gq\_Saline vs Gq\_CNO,  $p < 0.001$ ; Dio\_Saline vs Dio\_CNO,  $p = 0.991$ ). (I) Quantification of central area time in the open-field test (two-way repeated measures ANOVA; male: treatment:  $F_{(1, 19)} = 6.300$ ,  $p = 0.021$ ,  $BF_{(incl)} = 2.007$ ; group:  $F_{(2, 19)} = 5.434$ ,  $p = 0.014$ ,  $BF_{(incl)} = 0.777$ ; treatment  $\times$  group:  $F_{(1, 19)} = 8.433$ ,  $p = 0.002$ ,  $BF_{(incl)} = 215.751$ ; post-hoc comparisons (Tukey): Gi\_Saline vs Gi\_CNO,  $p = 0.002$ ; Gq\_Saline vs Gq\_CNO,  $p = 1$ ; Dio\_Saline vs Dio\_CNO,  $p = 0.991$ ). Female: treatment:  $F_{(1, 20)} = 4.570$ ,  $p = 0.045$ ,  $BF_{(incl)} = 1.120$ ; group:  $F_{(2, 20)} = 2.884$ ,  $p = 0.079$ ,  $BF_{(incl)} = 0.816$ ; treatment  $\times$  group:  $F_{(1, 20)} = 10.778$ ,  $p < 0.001$ ,  $BF_{(incl)} = 154.421$ . Post-hoc comparisons (Tukey): Gi\_Saline vs Gi\_CNO,  $p < 0.001$ ; Gq\_Saline vs Gq\_CNO,  $p < 0.001$ ; Dio\_Saline vs Dio\_CNO,  $p = 0.991$ ). Figure 3 continued on next page

Figure 3 continued

vs Gq\_CNO,  $p = 0.996$ ; Dio\_Saline vs Dio\_CNO,  $p = 0.977$ . (H) Quantification of social preference ratio in the three-chamber test (two-way repeated measures ANOVA along with two-way Bayesian repeated measures ANOVA; male: treatment:  $F_{(1, 19)} = 4.707$ ,  $p = 0.043$ ,  $BF_{(incl)} = 2.261$ ; group:  $F_{(2, 19)} = 1.387$ ,  $p = 0.274$ ,  $BF_{(incl)} = 0.365$ ; treatment  $\times$  group:  $F_{(1, 19)} = 2.990$ ,  $p = 0.074$ ,  $BF_{(incl)} = 2.562$ ; post-hoc comparisons (Tukey): Gi\_Saline vs Gi\_CNO,  $p = 0.046$ ; Gq\_Saline vs Gq\_CNO,  $p = 1$ ; Dio\_Saline vs Dio\_CNO,  $p = 1$ ; female: treatment:  $F_{(1, 20)} = 11.687$ ,  $p = 0.003$ ,  $BF_{(incl)} = 9.390$ ; group:  $F_{(2, 20)} = 0.205$ ,  $p = 0.817$ ,  $BF_{(incl)} = 0.272$ ; treatment  $\times$  group:  $F_{(1, 20)} = 8.923$ ,  $p = 0.002$ ,  $BF_{(incl)} = 42.856$ ; post-hoc comparisons (Tukey): Gi\_Saline vs Gi\_CNO,  $p < 0.001$ ; Gq\_Saline vs Gq\_CNO,  $p = 0.307$ ; Dio\_Saline vs Dio\_CNO,  $p = 0.892$ ). (I) Quantification of time spent in the central area in the open-field test (two-way repeated measures ANOVA along with two-way Bayesian repeated measures ANOVA; male: treatment:  $F_{(1, 19)} = 4.305$ ,  $p = 0.052$ ,  $BF_{(incl)} = 4.438$ ; group:  $F_{(2, 19)} = 2.064$ ,  $p = 0.155$ ,  $BF_{(incl)} = 0.384$ ; treatment  $\times$  group:  $F_{(1, 19)} = 0.164$ ,  $p = 0.850$ ,  $BF_{(incl)} = 0.300$ ; post-hoc comparisons (Tukey): Gi\_Saline vs Gi\_CNO,  $p = 0.963$ ; Gq\_Saline vs Gq\_CNO,  $p = 0.605$ ; Dio\_Saline vs Dio\_CNO,  $p = 0.838$ ; female: treatment:  $F_{(1, 20)} = 0.288$ ,  $p = 0.597$ ,  $BF_{(incl)} = 0.313$ ; group:  $F_{(2, 20)} = 4.419$ ,  $p = 0.026$ ,  $BF_{(incl)} = 2.335$ ; treatment  $\times$  group:  $F_{(1, 20)} = 2.242$ ,  $p = 0.132$ ,  $BF_{(incl)} = 1.146$ ; post-hoc comparisons (Tukey): Gi\_Saline vs Gi\_CNO,  $p = 0.959$ ; Gq\_Saline vs Gq\_CNO,  $p = 0.726$ ; Dio\_Saline vs Dio\_CNO,  $p = 0.711$ ). Male\_Dio,  $n = 8$ ; female\_Dio,  $n = 7$ ; male\_Gq,  $n = 7$ ; female\_Gq,  $n = 8$ ; male\_Gi,  $n = 7$ ; female\_Gi,  $n = 8$ . Error bars are  $\pm$  SEM. Scale bars, 100  $\mu$ m. \* $p < 0.05$ , \*\* $p < 0.01$ . For raw data in this figure, please refer to **Figure 3—source data 1**. ACC: anterior cingulate cortex; Aq: aqueduct; ANOVA: analysis of variance; DR: dorsal raphe nucleus; TPH2: tryptophan hydroxylase 2; M: male; F: female; 5-HT: serotonin.

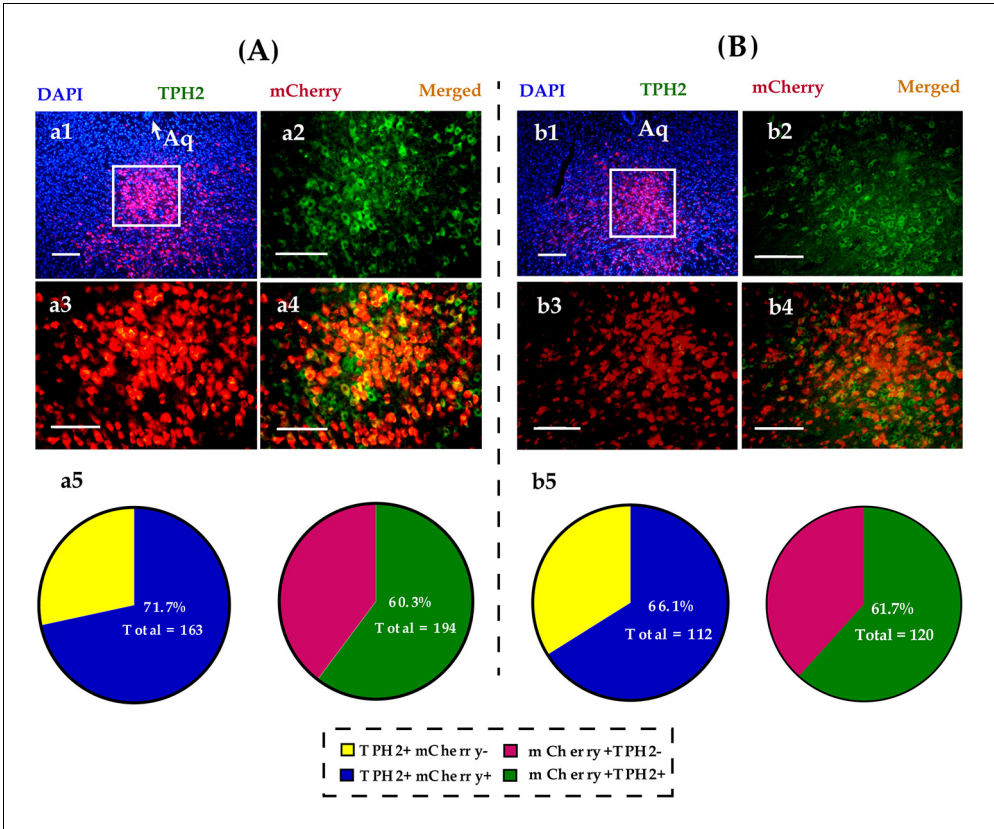

**Figure 3—figure supplement 1.** Immunohistological image showing colocalization of DREADD (mCherry, red), TPH2+ neurons (green), and DAPI (blue) in the DR of male (A) and (B) female voles. (a1 and b1) Merged image of DAPI and mCherry; (a2–a4, b2–b4) amplified images in the left box showing the mCherry, TPH2, and the colocalization of mCherry and TPH2; (a5, b5) quantification rates of mCherry neurons colabeled with TPH2 (left pies) and TPH2 neurons colabeled with mCherry (right pies),  $n = 3$  in each sex. Scale bars, 100  $\mu\text{m}$ . Aq: aqueduct; DR: dorsal raphe nucleus; TPH2: tryptophan hydroxylase 2; DAPI: 4',6-diamidino-2-phenylindole.

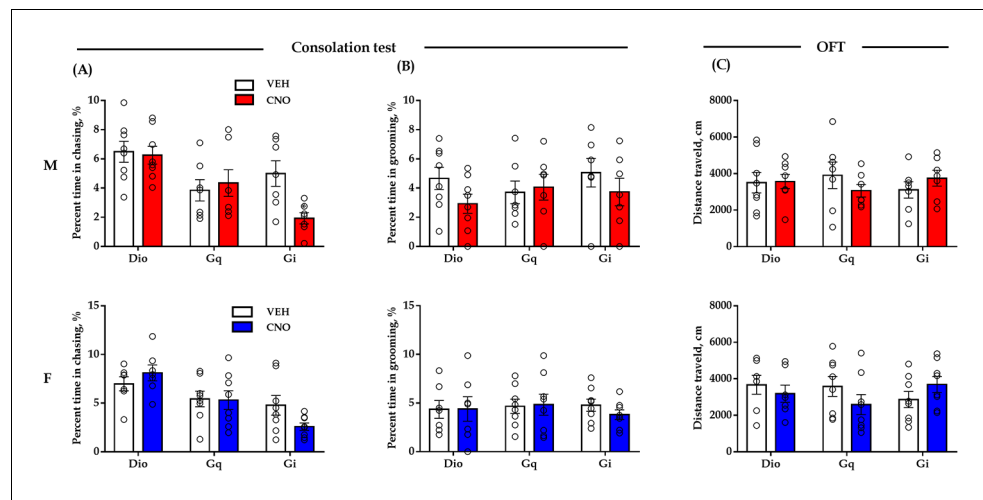

**Figure 3—figure supplement 2.** Effect of chemogenetic modulation of DR 5-HT neuron activities in the DR-ACC neural circuit on some control behaviors. (A) Quantification of chasing time in the consolation test (male: treatment:  $F_{(1, 19)} = 2.118$ ,  $p = 0.162$ ,  $BF_{(incl)} = 0.757$ ; group:  $F_{(2, 19)} = 11.238$ ,  $p < 0.001$ ,  $BF_{(incl)} = 7.968$ ; treatment  $\times$  group:  $F_{(1, 19)} = 2.765$ ,  $p = 0.088$ ,  $BF_{(incl)} = 2.286$ ; post-hoc comparisons (Tukey): Gi\_Saline vs Gi\_CNO,  $p = 0.122$ ; Gq\_Saline vs Gq\_CNO,  $p = 0.998$ ; Dio\_Saline vs Dio\_CNO,  $p = 1$ ; female: treatment:  $F_{(1, 20)} = 0.436$ ,  $p = 0.517$ ,  $BF_{(incl)} = 0.363$ ; group:  $F_{(2, 20)} = 9.228$ ,  $p = 0.001$ ,  $BF_{(incl)} = 15.063$ ; treatment  $\times$  group:  $F_{(1, 20)} = 2.564$ ,  $p = 0.102$ ,  $BF_{(incl)} = 1.396$ ; post-hoc comparisons (Tukey): Gi\_Saline vs Gi\_CNO,  $p = 0.300$ ; Gq\_Saline vs Gq\_CNO,  $p = 1$ ; Dio\_Saline vs Dio\_CNO,  $p = 0.902$ ). (B) Quantification of selfgrooming time in the consolation test (male: treatment:  $F_{(1, 19)} = 1.957$ ,  $p = 0.178$ ,  $BF_{(incl)} = 0.824$ ; group:  $F_{(2, 19)} = 0.270$ ,  $p = 0.766$ ,  $BF_{(incl)} = 0.278$ ; treatment  $\times$  group:  $F_{(1, 19)} = 0.980$ ,  $p = 0.393$ ,  $BF_{(incl)} = 0.525$ ; female: treatment:  $F_{(1, 20)} = 0.115$ ,  $p = 0.739$ ,  $BF_{(incl)} = 0.307$ ; group:  $F_{(2, 20)} = 0.189$ ,  $p = 0.829$ ,  $BF_{(incl)} = 0.237$ ; treatment  $\times$  group:  $F_{(1, 20)} = 0.229$ ,  $p = 0.797$ ,  $BF_{(incl)} = 0.309$ ). (C) Quantification of total distance traveled in the 5-min open-field test (male: treatment:  $F_{(1, 19)} = 0.005$ ,  $p = 0.945$ ,  $BF_{(incl)} = 0.289$ ; group:  $F_{(2, 19)} = 0.028$ ,  $p = 0.236$ ,  $BF_{(incl)} = 0.384$ ; treatment  $\times$  group:  $F_{(1, 19)} = 0.979$ ,  $p = 0.394$ ,  $BF_{(incl)} = 0.556$ ; female: treatment:  $F_{(1, 20)} = 0.299$ ,  $p = 0.591$ ,  $BF_{(incl)} = 0.337$ ; group:  $F_{(2, 20)} = 0.231$ ,  $p = 0.796$ ,  $BF_{(incl)} = 0.249$ ; treatment  $\times$  group:  $F_{(1, 20)} = 1.926$ ,  $p = 0.172$ ,  $BF_{(incl)} = 1.191$ ). Male\_Dio,  $n = 8$ ; female\_Dio,  $n = 7$ ; male\_Gq,  $n = 7$ ; female\_Gq,  $n = 8$ ; male\_Gi,  $n = 7$ ; female\_Gi,  $n = 8$ . Two-way repeated measures ANOVA along with two-way Bayesian repeated measures ANOVA. Error bars are  $\pm$  SEM. For raw data in this figure, please refer to **Figure 3—figure supplement 2—source data 1**. ACC: anterior cingulate cortex; Aq: aqueduct; ANOVA: analysis of variance; DR: dorsal raphe nucleus; TPH2: tryptophan hydroxylase 2; M: male; F: female; 5-HT: serotonin.



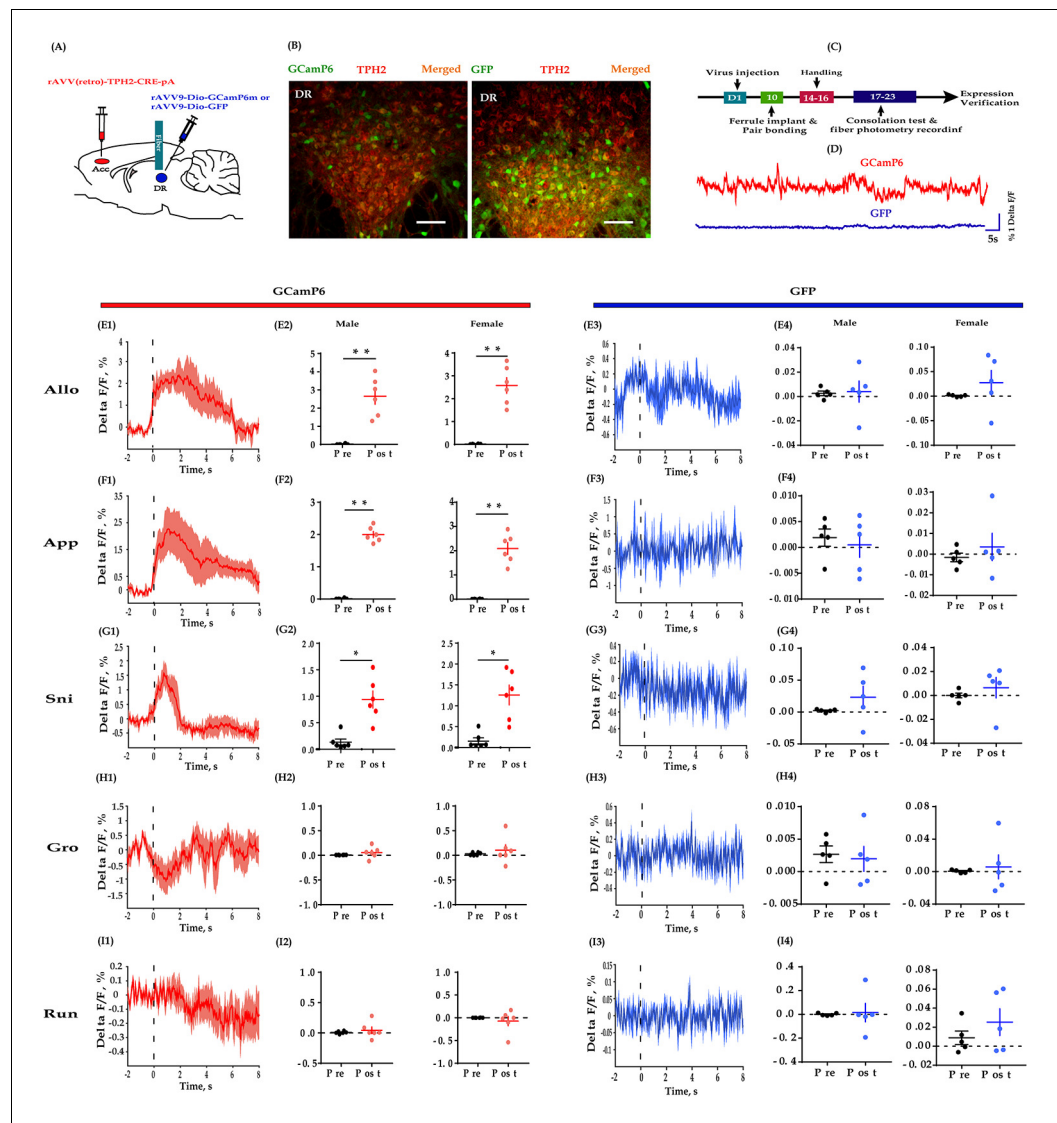

**Figure 4.** Fiber photometry recording DR 5-HT neural dynamics during the consolation test. (A) Schematic diagrams depicting the virus injection and recording sites. (B) Histology showing the expression of GCaMP6 (left) and GFP control (right) in the DR. (C) Experimental timeline for photometry experiments. (D) Representative fluorescence changes of GCaMP6 (red line) and GFP (blue line) during photometry recordings. (E1-I1) Representative peri-event plot of GCaMP6 fluorescence signals aligned to onsets of various behaviors (for all peri-event plots, the red line denotes the mean signals of four to six bouts of behaviors, whereas the red shaded region denotes the SEM). (E2) Quantification of change in GCaMP6 fluorescence signals before and after allogrooming ( $n = 6$  in each group; male:  $t_{(5)} = -5.967$ ,  $p = 0.002$ ,  $BF_{+0} = 24.488$  with median posterior  $\delta = -1.904$ , 95% CI =  $[-3.749, -0.424]$ ; female:  $t_{(5)} = -7.420$ ,  $p < 0.01$ ,  $BF_{+0} = 52.689$  with median posterior  $\delta = -2.397$ , 95% CI =  $[-4.610, -0.625]$ ). (F2) Quantification of change in GCaMP6 fluorescence signals before and after approaching ( $n = 6$  in each group; male:  $t_{(5)} = -19.871$ ,  $p < 0.001$ ,  $BF_{+0} = 2233.691$ ; female:  $t_{(5)} = -8.448$ ,  $p < 0.001$ ,  $BF_{+0} = 84.470$  with median posterior  $\delta = -2.747$ , 95% CI =  $[-5.225, -0.767]$ ). (G2) Quantification of change in GCaMP6 fluorescence signals before and after sniffing ( $n = 6$  in each group; male:  $t_{(5)} = -3.689$ ,  $p = 0.011$ ,  $BF_{+0} = 6.449$  with median posterior  $\delta = -1.221$ , 95% CI =  $[-2.576, -0.138]$ ; female:  $t_{(5)} = -3.689$ ,  $p = 0.014$ ,  $BF_{+0} = 5.312$  with median posterior  $\delta = -1.137$ , 95% CI =  $[-2.434, -0.101]$ ). (H2) Quantification of change in GCaMP6 fluorescence signals before and after selfgrooming ( $n = 6$  in each group; male:  $t_{(5)} = -1.032$ ,  $p = 0.350$ ,  $BF_{+0} = 0.559$  with median posterior  $\delta = -0.300$ , 95% CI =  $[-1.076, 0.383]$ ; female:  $t_{(5)} = -0.707$ ,  $p = 0.511$ ,  $BF_{+0} = 0.456$  with median posterior  $\delta = -0.205$ , 95% CI =  $[-0.904, 0.466]$ ). (I2) Quantification of change in GCaMP6 fluorescence signals before and after running ( $n = 6$  in each group; male:  $t_{(5)} = -1.032$ ,  $p = 0.350$ ,  $BF_{+0} = 0.559$  with median posterior  $\delta = -0.300$ , 95% CI =  $[-1.076, 0.383]$ ; female:  $t_{(5)} = -0.707$ ,  $p = 0.511$ ,  $BF_{+0} = 0.456$  with median posterior  $\delta = -0.205$ , 95% CI =  $[-0.904, 0.466]$ ). Figure 4 continued on next page

Figure 4 continued

−0.205, 95% CI = [−0.904, 0.466]). (E3–I3) Representative peri-event plot of GFP signals aligned to onsets of various behavioral events (for all peri-event plots, the blue line denotes the mean signals of four to six bouts of behaviors, whereas the blue shaded region denotes the SE). (E4) Quantification of change in GFP fluorescence signals before and after allogrooming ( $n = 5$  in each group; male:  $t_{(4)} = -0.145$ ,  $p = 0.885$ ,  $BF_{+0} = 0.401$  with median posterior  $\delta = -0.047$ , 95% CI = [−0.3787, 0.675]; female:  $t_{(4)} = -1.085$ ,  $p = 0.339$ ,  $BF_{+0} = 0.610$  with median posterior  $\delta = -0.32$ , 95% CI = [−1.198, −0.406]). (F4) Quantification of change in GFP fluorescence signals before and after approaching ( $n = 5$  in each group; male:  $t_{(4)} = -1.211$ ,  $p = 0.293$ ,  $BF_{+0} = 0.667$  with median posterior  $\delta = -0.371$ , 95% CI = [−1.260, 0.377]; female:  $t_{(4)} = -0.723$ ,  $p = 0.510$ ,  $BF_{+0} = 0.488$  with median posterior  $\delta = -0.220$ , 95% CI = [−1.026, 0.499]). (G4) Quantification of change in GFP fluorescence signals before and after sniffing ( $n = 5$  in each group; male:  $t_{(4)} = 1.001$ ,  $p = 0.373$ ,  $BF_{+0} = 0.577$  with median posterior  $\delta = 0.306$ , 95% CI = [−0.427, 1.156]; female:  $t_{(4)} = -0.687$ ,  $p = 0.530$ ,  $BF_{+0} = 0.479$  with median posterior  $\delta = -0.209$ , 95% CI = [−1.009, 0.510]). (H4) Quantification of change in GFP fluorescence signals before and after selfgrooming ( $n = 5$  in each group; male:  $t_{(4)} = 0.237$ ,  $p = 0.825$ ,  $BF_{+0} = 0.407$  with median posterior  $\delta = 0.072$ , 95% CI = [−0.647, 0.819]; female:  $t_{(4)} = -0.350$ ,  $p = 0.744$ ,  $BF_{+0} = 0.418$  with median posterior  $\delta = -0.106$ , 95% CI = [−0.865, 0.610]). (I4) Quantification of change in GFP fluorescence signals before and after running ( $n = 5$  in each group; paired  $t$ -test and Bayesian paired samples  $t$ -test, two-tailed; male:  $t_{(4)} = -0.202$ ,  $p = 0.850$ ,  $BF_{+0} = 0.404$  with median posterior  $\delta = -0.061$ , 95% CI = [−0.806, 0.659]; female:  $t_{(4)} = -1.813$ ,  $p = 0.144$ ,  $BF_{+0} = 52.689$  with median posterior  $\delta = 0.560$ , 95% CI = [−1.580, −0.251]). Error bars are  $\pm$  SEM. Scale bars, 100  $\mu$ m. \* $p < 0.05$ , \*\* $p < 0.01$ . Paired samples  $t$ -test along with Bayesian paired samples  $t$ -test. For raw data in this figure, please refer to **Figure 4—source data 1**. ACC: anterior cingulate cortex; GFP: green fluorescent protein; TPH2: tryptophan hydroxylase 2; Aq: aqueduct; Allo: allogrooming; Sni: sniffing; App: approaching; Gro: selfgrooming; Run: running; 5-HT: serotonin.

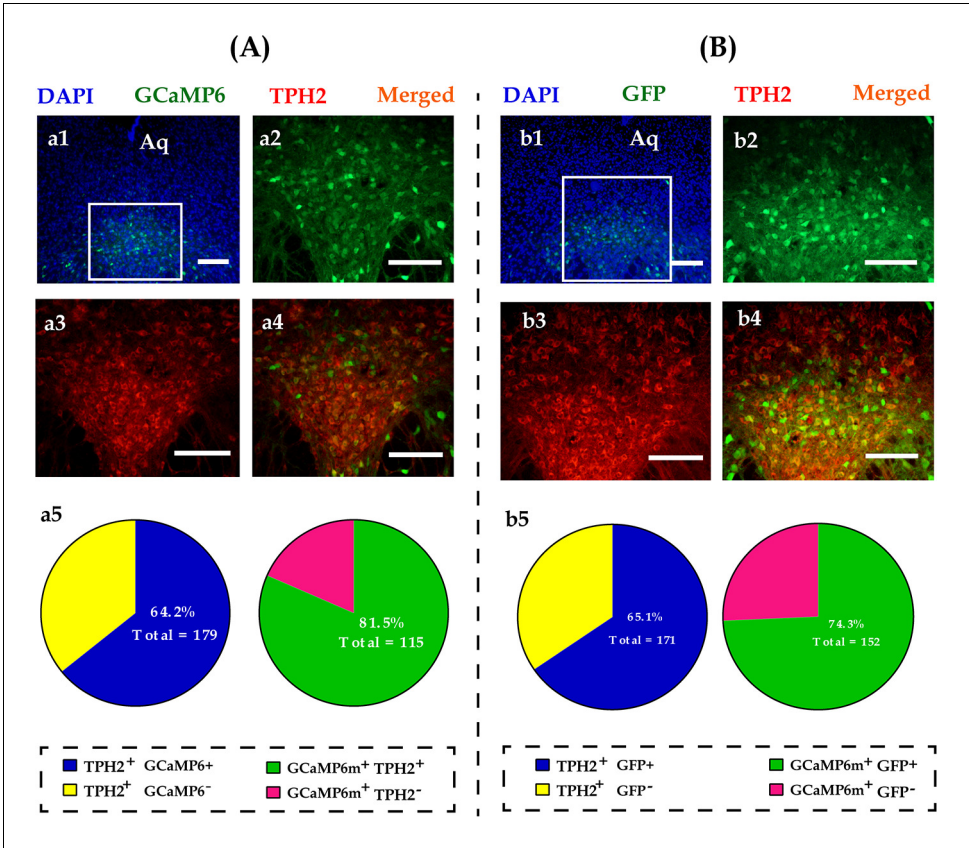

**Figure 4—figure supplement 1.** Representative viral infection images of GCaMP6 (A) and virus control of GFP (B). (a1) Immunohistological image showing GCaMP6 expression in the DR; (a2–a4) amplified images in the left box showing the GCaMP6 (green), TPH2 (red), and the colocalization (yellow) of the two; (a5) quantification rates of GCaMP6 neurons colabeled with TPH2 (left pie) and TPH2 neurons colabeled with GCaMP6 (right pie),  $N = 3$ ; (b1) immunohistological image showing GFP expression in the DR; (b2–b4) amplified images in the left box showing the GFP (green), TPH2 (red), and the colocalization (yellow) of the two; (b5) quantification rates of GFP neurons colabeled with TPH2 (left pie) and TPH2 neurons colabeled with GFP (right pie),  $n = 3$  in each sex. Scale bars, 100  $\mu\text{m}$ . Aq: aqueduct; DR: dorsal raphe nucleus; TPH2: tryptophan hydroxylase 2; GFP: green fluorescent protein.

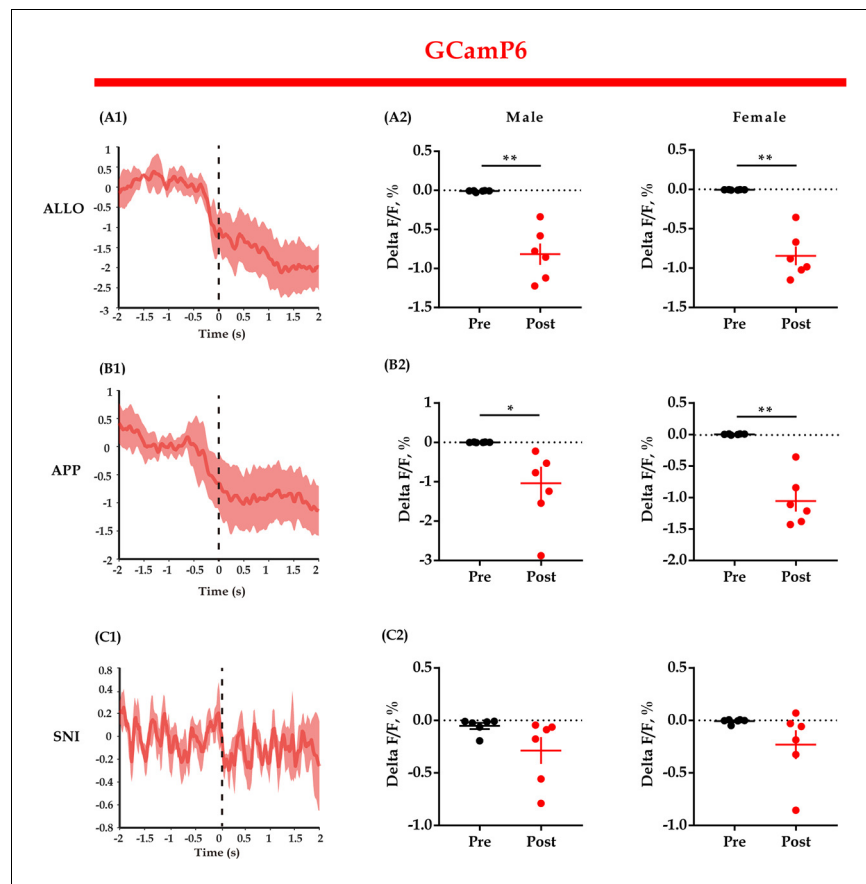

**Figure 4—figure supplement 2.** GCaMP6 fluorescent signals align to the end of some behaviors. (A1, B1, C1) Representative peri-event plot of GCaMP6 fluorescence signals aligned to the end of allogrooming, social approaching, and sniffing (for all peri-event plots, the red line denotes the mean signals of four to six bouts of behaviors, whereas the red shaded region denotes the SE). (A2, B2, C2) Quantification of change in GCaMP6 fluorescence signals ( $n = 6$  in each group; paired t-test and Bayesian paired samples t-test, two-tailed; A2: male:  $t_{(5)} = 5.984$ ,  $p < 0.001$ ,  $BF_{+0} = 49.388$  with median posterior  $\delta = 1.912$ , 95% CI = [0.453, 3.760]; female:  $t_{(5)} = 7.105$ ,  $p < 0.001$ ,  $BF_{+0} = 90.205$  with median posterior  $\delta = 2.292$ , 95% CI = [0.598, 4.424]; B2: male:  $t_{(5)} = 3.170$ ,  $p = 0.012$ ,  $BF_{+0} = 6.839$  with median posterior  $\delta = 0.982$ , 95% CI = [0.139, 2.153]; female:  $t_{(5)} = 6.459$ ,  $p < 0.001$ ,  $BF_{+0} = 64.386$  with median posterior  $\delta = 2.073$ , 95% CI = [0.514, 4.040]; C2: male:  $t_{(5)} = 1.611$ ,  $p = 0.084$ ,  $BF_{+0} = 1.589$  with median posterior  $\delta = 0.528$ , 95% CI = [0.041, 1.363]; female:  $t_{(5)} = 1.724$ ,  $p = 0.073$ ,  $BF_{+0} = 1.778$  with median posterior  $\delta = 0.557$ , 95% CI = [0.046, 1.415]). Data are presented as mean  $\pm$  SE, \* $p < 0.05$ , \*\* $p < 0.01$ . For raw data, please refer to **Figure 4—figure supplement 2—source data 1**. ALLO: allogrooming; APP: approaching; SNI: sniffing.

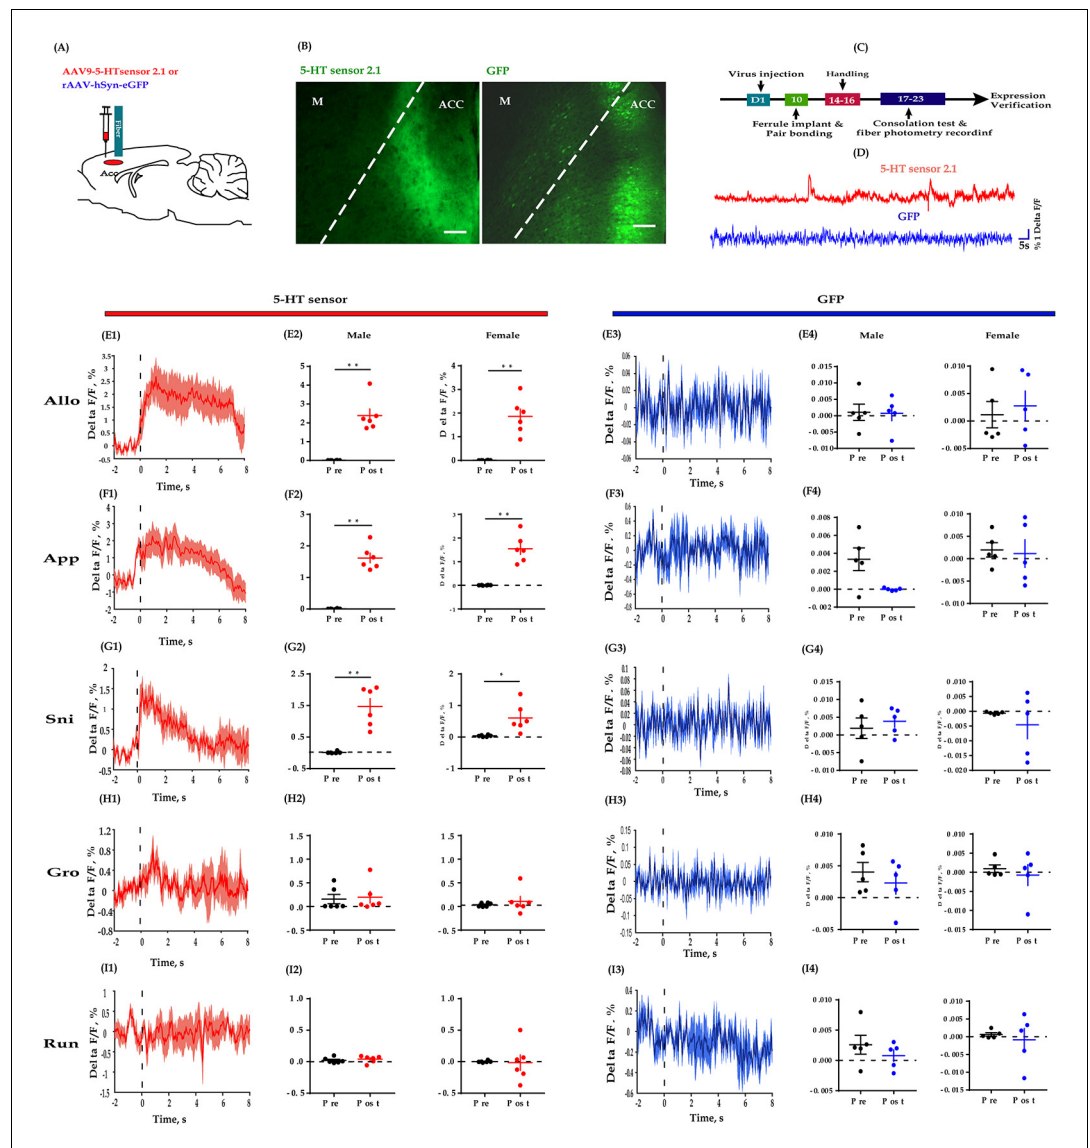

**Figure 5.** Fiber photometry recording dynamics of 5-HT within the ACC during the consolation test. (A) Schematic diagrams depicting the virus injection and recording sites. (B) Histology showing the expression of 5-HT sensor (left) and GFP control (right) within the ACC. (C) Experimental timeline for photometry experiments. (D) Representative fluorescence changes of 5-HT sensor (red line) and GFP (blue line) during photometry recordings. (E1–I1) Representative peri-event plot of 5-HT fluorescence signals aligned to onsets of various behaviors (for all peri-event plots, the red line denotes the mean signals of four to six bouts of behaviors, whereas the red shaded region denotes the SEM). (E2) Quantification of change in 5-HT fluorescence signals before and after allogrooming ( $n = 6$  in each group; male:  $t_{(5)} = -6.687$ ,  $p = 0.001$ ,  $BF_{+0} = 36.393$  with median posterior  $\delta = -2.148$ , 95% CI =  $[-4.174, -0.523]$ ; female:  $t_{(5)} = -6.038$ ,  $p = 0.002$ ,  $BF_{+0} = 25.495$  with median posterior  $\delta = -1.928$ , 95% CI =  $[-3.790, -0.433]$ ). (F2) Quantification of change in 5-HT fluorescence signals before and after approaching ( $n = 6$  in each group; male:  $t_{(5)} = -10.551$ ,  $p < 0.001$ ,  $BF_{+0} = 193.396$  with median posterior  $\delta = -3.460$ , 95% CI =  $[-6.490, -1.060]$ ; female:  $t_{(5)} = -6.496$ ,  $p = 0.001$ ,  $BF_{+0} = 32.865$  with median posterior  $\delta = -2.083$ , 95% CI =  $[-4.061, -0.497]$ ). (G2) Quantification of change in 5-HT fluorescence signals before and after sniffing ( $n = 6$  in each group; male:  $t_{(5)} = -5.863$ ,  $p = 0.002$ ,  $BF_{+0} = 23.053$  with median posterior  $\delta = -1.868$ , 95% CI =  $[-3.687, -0.409]$ ; female:  $t_{(5)} = -3.030$ ,  $p = 0.029$ ,  $BF_{+0} = 3.108$  with median posterior  $\delta = -0.921$ , 95% CI =  $[-2.070, 0.000]$ ). (H2) Quantification of change in 5-HT fluorescence signals before and after selfgrooming ( $n = 6$  in each group; male:  $t_{(5)} = -0.215$ ,  $p = 0.838$ ,  $BF_{+0} = 0.381$  with median posterior  $\delta = -0.062$ , 95% CI =  $[-0.753, 0.609]$ ; female:  $t_{(5)} = -0.738$ ,  $p = 0.494$ ,  $BF_{+0} = 0.464$  with median posterior  $\delta = -0.214$ , 95% CI =  $[-0.953, 0.458]$ ). (I2) Quantification of change in 5-HT fluorescence signals before and after running ( $n = 6$  in each group; male:  $t_{(5)} = -0.627$ ,  $p = 0.558$ ,  $BF_{+0} = 0.141$  with median posterior  $\delta = -0.194$ , 95% CI =  $[-0.884, 0.496]$ ; female:  $t_{(5)} = -0.141$ ,  $p = 0.889$ ,  $BF_{+0} = 0.041$  with median posterior  $\delta = -0.047$ , 95% CI =  $[-0.504, 0.410]$ ). Figure 5 continued on next page

Figure 5 continued

$BF_{+0} = 0.438$  with median posterior  $\delta = -0.182$ , 95% CI =  $[-0.908, -0.488]$ ; female:  $t_{(5)} = 0.129$ ,  $p = 0.903$ ,  $BF_{+0} = 0.376$  with median posterior  $\delta = 0.037$ , 95% CI =  $[-0.636, 0.722]$ ). **(E3–I3)** Representative peri-event plot of GFP signals aligned to onsets of various behavioral events (for all peri-event plots, the blue line denotes the mean signals of four to six bouts of behaviors, whereas the blue shaded region denotes the SE). **(E4)** Quantification of change in GFP fluorescence signals before and after allogrooming ( $n = 5$  in each group; male:  $t_{(4)} = 0.082$ ,  $p = 0.939$ ,  $BF_{+0} = 0.399$  with median posterior  $\delta = 0.025$ , 95% CI =  $[-0.700, 0.760]$ ; female:  $t_{(4)} = -0.340$ ,  $p = 0.751$ ,  $BF_{+0} = 0.610$  with median posterior  $\delta = -0.103$ , 95% CI =  $[-0.861, -0.614]$ ). **(F4)** Quantification of change in GFP fluorescence signals before and after approaching ( $n = 5$  in each group; male:  $t_{(4)} = -0.836$ ,  $p = 0.450$ ,  $BF_{+0} = 0.520$  with median posterior  $\delta = -0.255$ , 95% CI =  $[-1.078, 0.469]$ ; female:  $t_{(4)} = 0.861$ ,  $p = 0.438$ ,  $BF_{+0} = 0.528$  with median posterior  $\delta = 0.263$ , 95% CI =  $[-0.462, 1.090]$ ). **(G4)** Quantification of change in GFP fluorescence signals before and after sniffing ( $n = 5$  in each group; male:  $t_{(4)} = 2.686$ ,  $p = 0.055$ ,  $BF_{+0} = 2.077$  with median posterior  $\delta = 0.843$ , 95% CI =  $[-0.104, 2.086]$ ; female:  $t_{(4)} = 0.208$ ,  $p = 0.845$ ,  $BF_{+0} = 0.405$  with median posterior  $\delta = 0.063$ , 95% CI =  $[-0.657, 0.808]$ ). **(H4)** Quantification of change in GFP fluorescence signals before and after selfgrooming ( $n = 5$  in each group; male:  $t_{(4)} = 0.822$ ,  $p = 0.457$ ,  $BF_{+0} = 0.516$  with median posterior  $\delta = 0.251$ , 95% CI =  $[-0.473, 1.071]$ ; female:  $t_{(4)} = 0.653$ ,  $p = 0.549$ ,  $BF_{+0} = 0.471$  with median posterior  $\delta = 0.199$ , 95% CI =  $[-0.519, 0.994]$ ). **(I4)** Quantification of change in GFP fluorescence signals before and after running ( $n = 5$  in each group; male:  $t_{(4)} = 1.415$ ,  $p = 0.230$ ,  $BF_{+0} = 0.777$  with median posterior  $\delta = 0.435$ , 95% CI =  $[-0.331, 1.366]$ ; female:  $t_{(4)} = 0.510$ ,  $p = 0.637$ ,  $BF_{+0} = 0.442$  with median posterior  $\delta = 0.155$ , 95% CI =  $[-0.561, 0.932]$ ). Error bars are  $\pm$  SEM. Scale bars, 100  $\mu$ m. \* $p < 0.05$ , \*\* $p < 0.01$ ; paired samples t-test along with Bayesian paired samples t-test. For raw data in this figure, please refer to **Figure 5—source data 1**. ACC: anterior cingulate cortex; M: motor cortex; TPH2: tryptophan hydroxylase 2; Allo: allogrooming; Sni: sniffing; App: approaching; Gro: selfgrooming; Run: running; GFP: green fluorescent protein; 5-HT: serotonin.



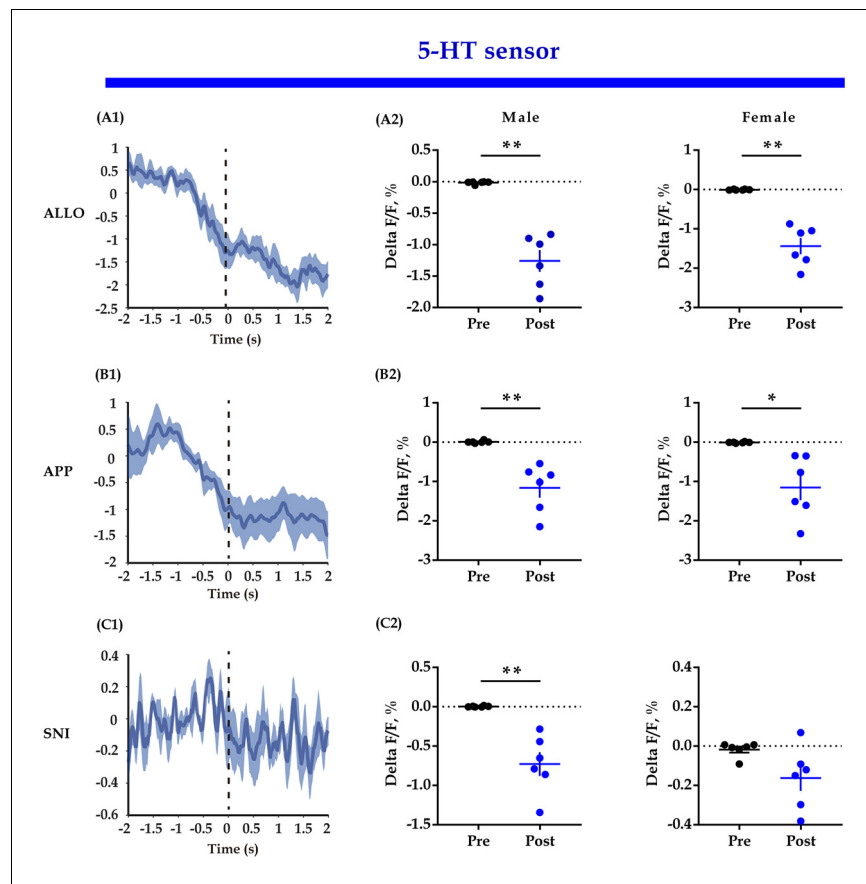

**Figure 5—figure supplement 1.** 5-HT sensor fluorescent signals align to the end of some behaviors. (A1, B1, C1) Representative peri-event plot of 5-HT sensor fluorescence signals aligned to the end of allogrooming, social approaching, and sniffing (for all peri-event plots, the blue line denotes the mean signals of four to six bouts of behaviors, whereas the blue shaded region denotes the SE). (A2, B2, C2) Quantification of change in 5-HT sensor fluorescence signals ( $n = 6$  in each group; paired  $t$ -test and Bayesian paired samples  $t$ -test, two-tailed; A2: male:  $t_{(5)} = 7.479$ ,  $p < 0.001$ ,  $BF_{+0} = 108.402$  with median posterior  $\delta = 2.419$ , 95% CI = [0.648, 4.646]; female:  $t_{(5)} = 6.994$ ,  $p < 0.001$ ,  $BF_{+0} = 6.994$  with median posterior  $\delta = 2.255$ , 95% CI = [0.584, 4.357]; B2: male:  $t_{(5)} = 4.489$ ,  $p = 0.003$ ,  $BF_{+0} = 19.042$  with median posterior  $\delta = 1.411$ , 95% CI = [0.273, 2.891]; female:  $t_{(5)} = 3.558$ ,  $p = 0.008$ ,  $BF_{+0} = 9.436$  with median posterior  $\delta = 1.106$ , 95% CI = [0.174, 2.366]; C2: male:  $t_{(5)} = 4.912$ ,  $p = 0.002$ ,  $BF_{+0} = 25.426$  with median posterior  $\delta = 1.552$ , 95% CI = [0.322, 3.0134]; female:  $t_{(5)} = 2.151$ ,  $p = 0.042$ ,  $BF_{+0} = 2.701$  with median posterior  $\delta = 0.674$ , 95% CI = [0.066, 1.620]). Data are presented as mean  $\pm$  SE, \* $p < 0.05$ , \*\* $p < 0.01$ . For raw data, please refer to **Figure 5—figure supplement 1—source data 1**. ALLO: allogrooming; APP: approaching; SNI: sniffing; 5-HT: serotonin.

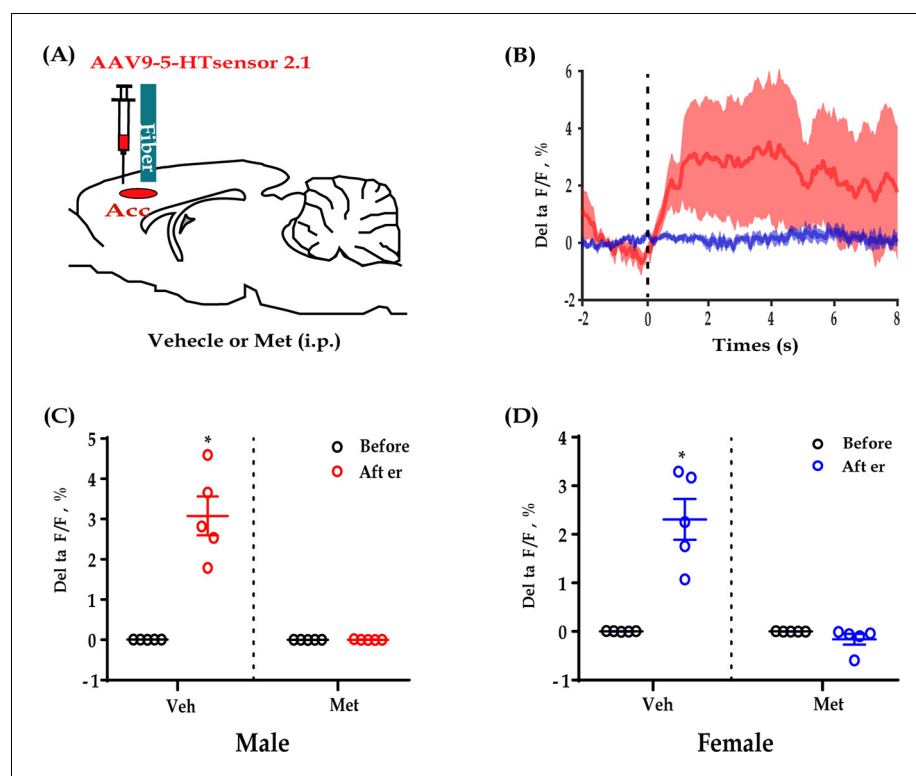

**Figure 5—figure supplement 2.** 5-HT sensor fluorescence changes during allogrooming could be blocked by Met. (A) Schematic diagrams. (B) Combined individual 5-HT sensor fluorescence traces during allogrooming in response to Met (blue) or Veh (red). (C) Quantification of 5-HT sensor fluorescence signals during allogrooming in response to Met or Veh in male subjects (time:  $F_{(1,8)} = 40.556$ ,  $p < 0.001$ ,  $BF_{(incl)} = 12.206$ ; group:  $F_{(1,8)} = 40.808$ ,  $p < 0.001$ ,  $BF_{(incl)} = 3.090$ ; time  $\times$  group:  $F_{(1,8)} = 40.427$ ,  $p < 0.001$ ,  $BF_{(incl)} = 1289.130$ ; post-hoc comparisons: Veh-after vs Veh-before/Met-before/Met-after, all  $p < 0.001$ ; Veh-before vs Met-before vs Met-after, all  $p > 0.05$ ). (D) Quantification of 5-HT sensor fluorescence signals during allogrooming in response to Met or Veh in female subjects (time:  $F_{(1,8)} = 24.096$ ,  $p = 0.001$ ,  $BF_{(incl)} = 5.265$ ; group:  $F_{(1,8)} = 32.819$ ,  $p < 0.001$ ,  $BF_{(incl)} = 2.818$ ; time  $\times$  group:  $F_{(1,8)} = 31.760$ ,  $BF_{(incl)} = 477.495$ ; post-hoc comparisons (Tukey): Veh-after vs Veh-before/Met-before/Met-after, all  $p < 0.001$ ; Veh-before vs Met-before vs Met-after, all  $p > 0.05$ ).  $N = 6$  in each group. Two-way repeated measures ANOVA and two-way Bayesian repeated measures ANOVA. Post-hoc comparisons: Tukey. Data are presented as mean  $\pm$  SE, \*\* $p < 0.01$ . For raw data, please refer to **Figure 5—figure supplement 2—source data 1**. ANOVA: analysis of variance; 5-HT: serotonin; Met: metergoline, a 5-HT receptor antagonist; Veh: vehicle.

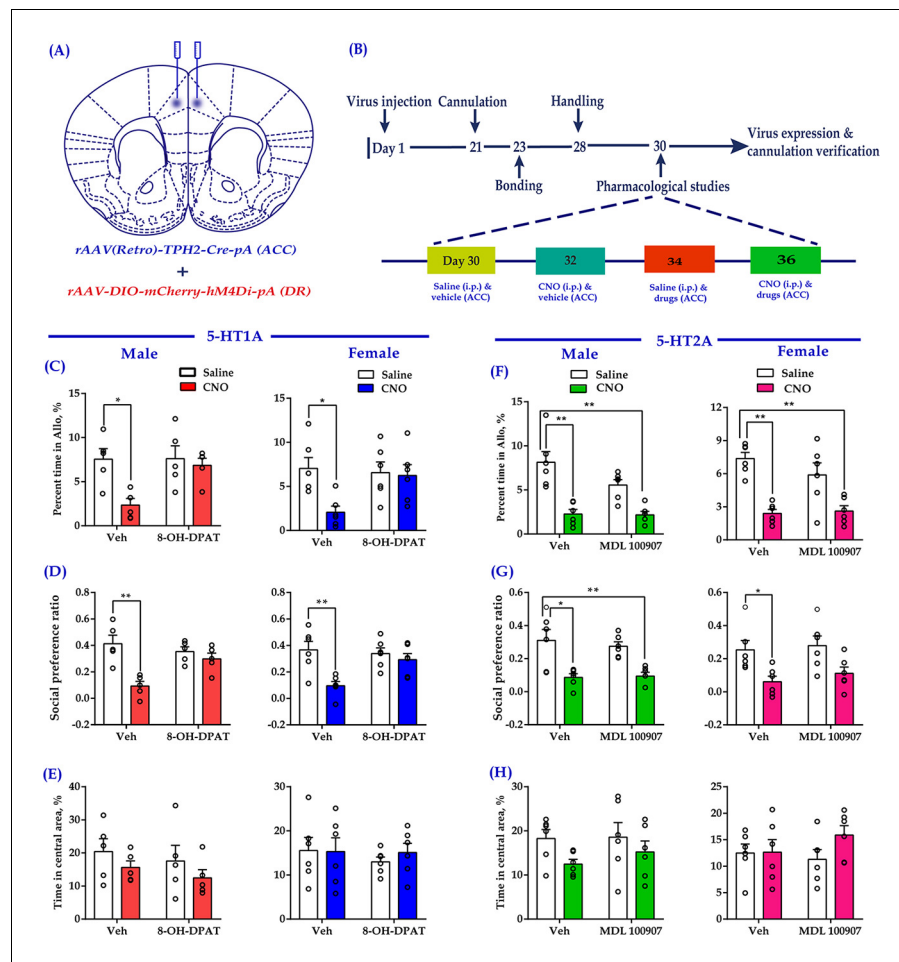

**Figure 6.** Intra-ACC injection of 8-OH-DPAT reduced sociability deficits induced by chemogenetic inhibition of DR 5-HT neurons in the DR→ACC neural circuit. **(A)** Schematic representation of ACC infusion sites and virus strategy. **(B)** Timeline of experimental design. **(C)** Effect of a 5-HT1AR agonist 8-OH-DPAT on allogrooming time in the consolation test ( $n = 5$  for male,  $n = 6$  for female; male: treatment 1:  $F_{(1,16)} = 8.230$ ,  $p = 0.011$ ,  $BF_{(incl)} = 3.005$ ; treatment 2:  $F_{(1,16)} = 4.926$ ,  $p = 0.041$ ,  $BF_{(incl)} = 1.380$ ; treatment 1  $\times$  treatment 2:  $F_{(1,16)} = 4.680$ ,  $p = 0.046$ ,  $BF_{(incl)} = 1.737$ ; post-hoc comparisons: Veh + Saline vs Veh + CNO,  $p = 0.013$ ; Veh + Saline vs 8-OH-DPAT+CNO,  $p = 0.967$ ; female: treatment 1:  $F_{(1,20)} = 5.632$ ,  $p = 0.028$ ,  $BF_{(incl)} = 1.911$ ; treatment 2:  $F_{(1,20)} = 2.746$ ,  $p = 0.113$ ,  $BF_{(incl)} = 0.831$ ; treatment 1  $\times$  treatment 2:  $F_{(1,20)} = 4.320$ ,  $p = 0.051$ ,  $BF_{(incl)} = 1.714$ ; post-hoc comparisons: Veh + Saline vs Veh + CNO,  $p = 0.024$ ; Veh + Saline vs 8-OH-DPAT+CNO,  $p = 0.957$ ). **(D)** Effect of 8-OH-DPAT on social preference ratio in the three-chamber test ( $n = 5$  for male,  $n = 6$  for female; male: treatment 1:  $F_{(1,16)} = 12.622$ ,  $p = 0.003$ ,  $BF_{(incl)} = 3.750$ ; treatment 2:  $F_{(1,16)} = 4.993$ ,  $p = 0.040$ ,  $BF_{(incl)} = 0.987$ ; treatment 1  $\times$  treatment 2:  $F_{(1,16)} = 12.622$ ,  $p = 0.003$ ,  $BF_{(incl)} = 10.906$ ; post-hoc comparisons: Veh + Saline vs Veh + CNO,  $p < 0.001$ ; Veh + Saline vs 8-OH-DPAT+CNO,  $p = 0.788$ ; female: treatment 1:  $F_{(1,20)} = 10.820$ ,  $p = 0.004$ ,  $BF_{(incl)} = 6.321$ ; treatment 2:  $F_{(1,20)} = 3.075$ ,  $p = 0.095$ ,  $BF_{(incl)} = 0.858$ ; treatment 1  $\times$  treatment 2:  $F_{(1,20)} = 5.437$ ,  $p = 0.030$ ,  $BF_{(incl)} = 2.347$ ; post-hoc comparisons: Veh + Saline vs Veh + CNO,  $p = 0.004$ ; Veh + Saline vs 8-OH-DPAT + CNO,  $p = 0.702$ ). **(E)** Effect of 8-OH-DPAT on time spent in the central area in the open-field test ( $n = 5$  for male,  $n = 6$  for female; male: treatment 1:  $F_{(1,16)} = 2.063$ ,  $p = 0.170$ ,  $BF_{(incl)} = 0.854$ ; treatment 2:  $F_{(1,16)} = 0.759$ ,  $p = 0.396$ ,  $BF_{(incl)} = 0.523$ ; treatment 1  $\times$  treatment 2:  $F_{(1,16)} = 0.003$ ,  $p = 0.960$ ,  $BF_{(incl)} = 0.498$ ; female: treatment 1:  $F_{(1,20)} = 0.144$ ,  $p = 0.708$ ,  $BF_{(incl)} = 0.393$ ; treatment 2:  $F_{(1,20)} = 0.324$ ,  $p = 0.575$ ,  $BF_{(incl)} = 0.422$ ; treatment 1  $\times$  treatment 2:  $F_{(1,20)} = 0.227$ ,  $p = 0.639$ ,  $BF_{(incl)} = 0.494$ ). **(F)** Effect of a 5-HT2AR antagonist (MDL 100907) on allogrooming time in the consolation test ( $n = 6$  in each group; male: treatment 1:  $F_{(1,20)} = 37.118$ ,  $p < 0.001$ ,  $BF_{(incl)} = 1591.039$ ; treatment 2:  $F_{(1,20)} = 3.094$ ,  $p = 0.094$ ,  $BF_{(incl)} = 0.940$ ; treatment 1  $\times$  treatment 2:  $F_{(1,20)} = 2.697$ ,  $p = 0.116$ ,  $BF_{(incl)} = 1.101$ ; post-hoc comparisons: Veh + Saline vs Veh + CNO,  $p < 0.001$ ; Veh + Saline vs MDL 100907 + CNO,  $p < 0.001$ ; female: treatment 1:  $F_{(1,20)} = 36.168$ ,  $p < 0.001$ ,  $BF_{(incl)} = 2649.973$ ; treatment 2:  $F_{(1,20)} = 0.860$ ,  $p = 0.365$ ,  $BF_{(incl)} = 0.484$ ; treatment 1  $\times$  treatment 2:  $F_{(1,20)} = 1.554$ ,  $p = 0.227$ ,  $BF_{(incl)} = 0.780$ ; post-hoc comparisons: Veh + Saline vs Veh + CNO,  $p < 0.001$ ; Veh + Saline vs MDL 100907 + CNO,  $p < 0.001$ ). **(G)** Effect of a 5-HT2AR antagonist (MDL 100907) on social preference ratio in the three-chamber test ( $n = 6$  in each group; male: treatment 1:  $F_{(1,16)} = 12.622$ ,  $p = 0.003$ ,  $BF_{(incl)} = 3.750$ ; treatment 2:  $F_{(1,16)} = 4.993$ ,  $p = 0.040$ ,  $BF_{(incl)} = 0.987$ ; treatment 1  $\times$  treatment 2:  $F_{(1,16)} = 12.622$ ,  $p = 0.003$ ,  $BF_{(incl)} = 10.906$ ; post-hoc comparisons: Veh + Saline vs Veh + CNO,  $p < 0.001$ ; Veh + Saline vs 8-OH-DPAT+CNO,  $p = 0.788$ ; female: treatment 1:  $F_{(1,20)} = 10.820$ ,  $p = 0.004$ ,  $BF_{(incl)} = 6.321$ ; treatment 2:  $F_{(1,20)} = 3.075$ ,  $p = 0.095$ ,  $BF_{(incl)} = 0.858$ ; treatment 1  $\times$  treatment 2:  $F_{(1,20)} = 5.437$ ,  $p = 0.030$ ,  $BF_{(incl)} = 2.347$ ; post-hoc comparisons: Veh + Saline vs Veh + CNO,  $p = 0.004$ ; Veh + Saline vs 8-OH-DPAT + CNO,  $p = 0.702$ ). **(H)** Effect of a 5-HT2AR antagonist (MDL 100907) on time spent in the central area in the open-field test ( $n = 6$  in each group; male: treatment 1:  $F_{(1,16)} = 2.063$ ,  $p = 0.170$ ,  $BF_{(incl)} = 0.854$ ; treatment 2:  $F_{(1,16)} = 0.759$ ,  $p = 0.396$ ,  $BF_{(incl)} = 0.523$ ; treatment 1  $\times$  treatment 2:  $F_{(1,16)} = 0.003$ ,  $p = 0.960$ ,  $BF_{(incl)} = 0.498$ ; female: treatment 1:  $F_{(1,20)} = 0.144$ ,  $p = 0.708$ ,  $BF_{(incl)} = 0.393$ ; treatment 2:  $F_{(1,20)} = 0.324$ ,  $p = 0.575$ ,  $BF_{(incl)} = 0.422$ ; treatment 1  $\times$  treatment 2:  $F_{(1,20)} = 0.227$ ,  $p = 0.639$ ,  $BF_{(incl)} = 0.494$ ). **(F)** Effect of a 5-HT2AR antagonist (MDL 100907) on allogrooming time in the consolation test ( $n = 6$  in each group; male: treatment 1:  $F_{(1,20)} = 37.118$ ,  $p < 0.001$ ,  $BF_{(incl)} = 1591.039$ ; treatment 2:  $F_{(1,20)} = 3.094$ ,  $p = 0.094$ ,  $BF_{(incl)} = 0.940$ ; treatment 1  $\times$  treatment 2:  $F_{(1,20)} = 2.697$ ,  $p = 0.116$ ,  $BF_{(incl)} = 1.101$ ; post-hoc comparisons: Veh + Saline vs Veh + CNO,  $p < 0.001$ ; Veh + Saline vs MDL 100907 + CNO,  $p < 0.001$ ; female: treatment 1:  $F_{(1,20)} = 36.168$ ,  $p < 0.001$ ,  $BF_{(incl)} = 2649.973$ ; treatment 2:  $F_{(1,20)} = 0.860$ ,  $p = 0.365$ ,  $BF_{(incl)} = 0.484$ ; treatment 1  $\times$  treatment 2:  $F_{(1,20)} = 1.554$ ,  $p = 0.227$ ,  $BF_{(incl)} = 0.780$ ; post-hoc comparisons: Veh + Saline vs Veh + CNO,  $p < 0.001$ ; Veh + Saline vs MDL 100907 + CNO,  $p < 0.001$ ). **(G)** Effect of a 5-HT2AR antagonist (MDL 100907) on social preference ratio in the three-chamber test ( $n = 6$  in each group; male: treatment 1:  $F_{(1,16)} = 12.622$ ,  $p = 0.003$ ,  $BF_{(incl)} = 3.750$ ; treatment 2:  $F_{(1,16)} = 4.993$ ,  $p = 0.040$ ,  $BF_{(incl)} = 0.987$ ; treatment 1  $\times$  treatment 2:  $F_{(1,16)} = 12.622$ ,  $p = 0.003$ ,  $BF_{(incl)} = 10.906$ ; post-hoc comparisons: Veh + Saline vs Veh + CNO,  $p < 0.001$ ; Veh + Saline vs 8-OH-DPAT+CNO,  $p = 0.788$ ; female: treatment 1:  $F_{(1,20)} = 10.820$ ,  $p = 0.004$ ,  $BF_{(incl)} = 6.321$ ; treatment 2:  $F_{(1,20)} = 3.075$ ,  $p = 0.095$ ,  $BF_{(incl)} = 0.858$ ; treatment 1  $\times$  treatment 2:  $F_{(1,20)} = 5.437$ ,  $p = 0.030$ ,  $BF_{(incl)} = 2.347$ ; post-hoc comparisons: Veh + Saline vs Veh + CNO,  $p = 0.004$ ; Veh + Saline vs 8-OH-DPAT + CNO,  $p = 0.702$ ). **(H)** Effect of a 5-HT2AR antagonist (MDL 100907) on time spent in the central area in the open-field test ( $n = 6$  in each group; male: treatment 1:  $F_{(1,16)} = 2.063$ ,  $p = 0.170$ ,  $BF_{(incl)} = 0.854$ ; treatment 2:  $F_{(1,16)} = 0.759$ ,  $p = 0.396$ ,  $BF_{(incl)} = 0.523$ ; treatment 1  $\times$  treatment 2:  $F_{(1,16)} = 0.003$ ,  $p = 0.960$ ,  $BF_{(incl)} = 0.498$ ; female: treatment 1:  $F_{(1,20)} = 0.144$ ,  $p = 0.708$ ,  $BF_{(incl)} = 0.393$ ; treatment 2:  $F_{(1,20)} = 0.324$ ,  $p = 0.575$ ,  $BF_{(incl)} = 0.422$ ; treatment 1  $\times$  treatment 2:  $F_{(1,20)} = 0.227$ ,  $p = 0.639$ ,  $BF_{(incl)} = 0.494$ ).

Figure 6 continued on next page

*Figure 6 continued*

Effect of MDL 100907 on social preference ratio in the three-chamber test ( $n = 6$  in each group; male: treatment 1:  $F_{(1, 20)} = 26.890$ ,  $p < 0.001$ ,  $BF_{(incl)} = 771.577$ ; treatment 2:  $F_{(1, 20)} = 0.124$ ,  $p = 0.729$ ,  $BF_{(incl)} = 0.386$ ; treatment 1  $\times$  treatment 2:  $F_{(1, 20)} = 0.316$ ,  $p = 0.580$ ,  $BF_{(incl)} = 0.496$ ; post-hoc comparisons: Veh + Saline vs Veh + CNO,  $p = 0.003$ ; Veh + Saline vs MDL 100907 + CNO,  $p = 0.004$ ; female: treatment 1:  $F_{(1, 20)} = 13.991$ ,  $p = 0.001$ ,  $BF_{(incl)} = 34.866$ ; treatment 2:  $F_{(1, 20)} = 0.620$ ,  $p = 0.440$ ,  $BF_{(incl)} = 0.443$ ; treatment 1  $\times$  treatment 2:  $F_{(1, 20)} = 0.071$ ,  $p = 0.793$ ,  $BF_{(incl)} = 0.500$ ; post-hoc comparisons: Veh + Saline vs Veh + CNO,  $p = 0.047$ ; Veh + Saline vs MDL 100907 + CNO,  $p = 0.191$ ). (H) Effect of MDL 100907 on time spent in the central area in the open-field test ( $n = 6$  in each group; male: treatment 1:  $F_{(1, 20)} = 3.702$ ,  $p = 0.069$ ,  $BF_{(incl)} = 1.469$ ; treatment 2:  $F_{(1, 20)} = 0.415$ ,  $p = 0.527$ ,  $BF_{(incl)} = 0.429$ ; treatment 1  $\times$  treatment 2:  $F_{(1, 20)} = 0.270$ ,  $p = 0.609$ ,  $BF_{(incl)} = 0.520$ ; female: treatment 1:  $F_{(1, 20)} = 1.506$ ,  $p = 0.234$ ,  $BF_{(incl)} = 0.655$ ; treatment 2:  $F_{(1, 20)} = 0.274$ ,  $p = 0.606$ ,  $BF_{(incl)} = 0.417$ ; treatment 1  $\times$  treatment 2:  $F_{(1, 20)} = 1.305$ ,  $p = 0.267$ ,  $BF_{(incl)} = 0.698$ ). Two-way ANOVA along with two-way Bayesian ANOVA. Error bars are  $\pm$  SEM. \* $p < 0.05$ , \*\* $p < 0.01$ . For raw data in this figure, please refer to **Figure 6—source data 1**. Anta: antagonist; ACC: anterior cingulate cortex; ANOVA: analysis of variance; DR: dorsal raphe nucleus; 5-HT: serotonin.

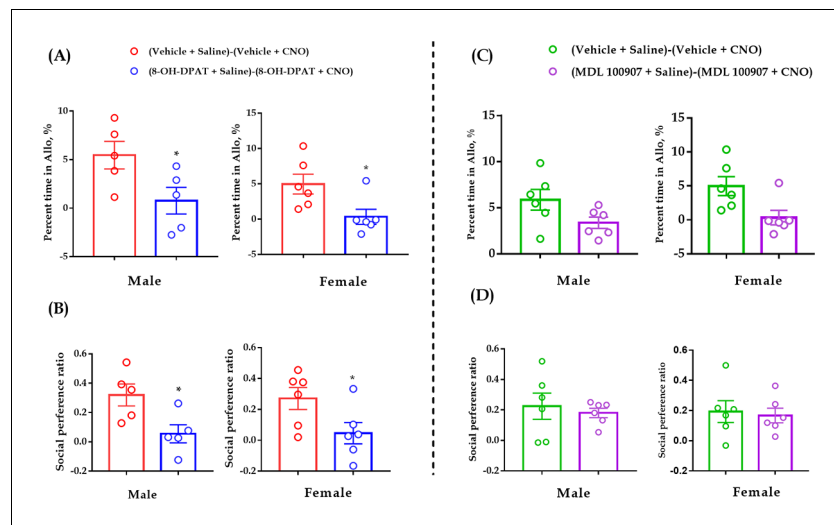

**Figure 6—figure supplement 1.** Comparisons of 'Vehicle + Saline - Vehicle + CNO' vs '8-OH-DPAT + Saline - 8-OH-DPAT + CNO' (A and B) and 'Vehicle + Saline - Vehicle + CNO' vs 'MDL 100907 + Saline - MDL 100907 + CNO' (C and D). (A) Male:  $N = 5$  in each group. (Vehicle + Saline)-(Vehicle + CNO) vs (8-OH-DPAT+Saline)-(8-OH-DPAT +CNO):  $t_{(8)} = 2.375$ ,  $p = 0.045$ ,  $BF_{+0} = 3.750$  with median posterior  $\delta = 0.999$ , 95% CI = [0.091 to 2.493]. Female:  $N = 6$  in each group. (Vehicle + Saline)-(Vehicle + CNO) vs (8-OH-DPAT+Saline)-(8-OH-DPAT+CNO):  $t_{(10)} = 2.639$ ,  $p = 0.025$ ,  $BF_{+0} = 5.482$  with median posterior  $\delta = 1.075$ , 95% CI = [0.123 to 2.453]. (B) Male:  $N = 5$  in each group. (Vehicle + Saline)-(Vehicle + CNO) vs (8-OH-DPAT+Saline)-(8-OH-DPAT+CNO):  $t_{(8)} = 2.727$ ,  $p = 0.026$ ,  $BF_{+0} = 5.368$  with median posterior  $\delta = 1.174$ , 95% CI = [0.123 to 2.767]. Female:  $N = 6$  in each group. (Vehicle + Saline)-(Vehicle + CNO) vs (8-OH-DPAT+Saline)-(8-OH-DPAT+CNO):  $t_{(10)} = 2.273$ ,  $p = 0.046$ ,  $BF_{+0} = 3.609$  with median posterior  $\delta = 0.906$ , 95% CI = [0.087 to 2.203]. (C) Male:  $N = 6$  in each group. (Vehicle + Saline)-(Vehicle + CNO) vs (MDL 100907 + Saline)-(MDL 100907 + CNO):  $t_{(10)} = 1.935$ ,  $p = 0.082$ ,  $BF_{+0} = 2.487$  with median posterior  $\delta = 0.766$ , 95% CI = [0.063 to 1.981]. Female:  $N = 6$  in each group. (Vehicle + Saline)-(Vehicle + CNO) vs (MDL 100907 + Saline)-(MDL 100907 + CNO):  $t_{(10)} = 1.092$ ,  $p = 0.300$ ,  $BF_{+0} = 1.076$  with median posterior  $\delta = 0.491$ , 95% CI = [0.029 to 1.492]. (D) Male:  $N = 6$  in each group. (Vehicle + Saline)-(Vehicle + CNO) vs (MDL 100907 + Saline)-(MDL 100907 + CNO):  $t_{(10)} = 0.481$ ,  $p = 0.641$ ,  $BF_{+0} = 0.648$  with median posterior  $\delta = 0.357$ , 95% CI = [0.018 to 1.210]. Female: (Vehicle + Saline)-(Vehicle + CNO) vs (MDL 100907 + Saline)-(MDL 100907 + CNO):  $t_{(10)} = 0.295$ ,  $p = 0.774$ ,  $BF_{+0} = 0.567$  with median posterior  $\delta = 0.325$ , 95% CI = [0.016 to 1.138]. Independent samples t-test. Data are presented as mean  $\pm$  SE, \* $p < 0.05$ . For raw data, please refer to **Figure 6—figure supplement 1—source data 1**.

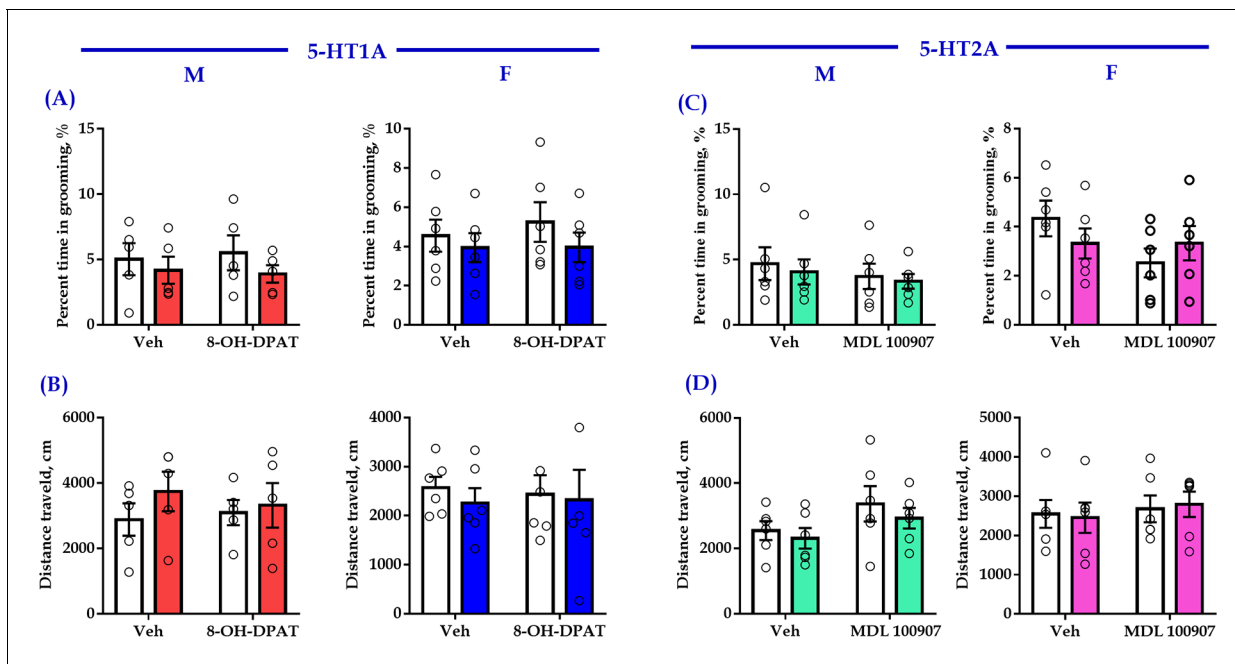

**Figure 6—figure supplement 2.** Chemogenetic inhibition of DR 5-HT neuron in the DR-ACC neural circuit along with intra-ACC. Injection of 5-HT1AR agonist (8-OH-DPAT) or 5-HT2AR antagonist (MDL 100907) had no significant effect on control behaviors of selfgrooming (A, C) and distance traveled in the open-field test (B, D). (A) Male:  $N = 5$  in each group. Treatment 1:  $F_{(1,16)} = 1.266$ ,  $p = 0.277$ ,  $BF_{(incl)} = 0.642$ ; treatment 2:  $F_{(1,16)} = 0.009$ ,  $p = 0.926$ ,  $BF_{(incl)} = 0.393$ ; treatment 1  $\times$  treatment 2:  $F_{(1,16)} = 0.126$ ,  $p = 0.728$ ,  $BF_{(incl)} = 0.535$ . Female:  $N = 6$  in each group. Treatment 1:  $F_{(1,20)} = 1.292$ ,  $p = 0.269$ ,  $BF_{(incl)} = 0.616$ ; treatment 2:  $F_{(1,20)} = 0.184$ ,  $p = 0.673$ ,  $BF_{(incl)} = 0.399$ ; treatment 1  $\times$  treatment 2:  $F_{(1,20)} = 0.165$ ,  $p = 0.689$ ,  $BF_{(incl)} = 0.502$ . (B) Male:  $N = 5$  in each group. Treatment 1:  $F_{(1,16)} = 0.964$ ,  $p = 0.341$ ,  $BF_{(incl)} = 0.580$ ; treatment 2:  $F_{(1,16)} = 0.037$ ,  $p = 0.849$ ,  $BF_{(incl)} = 0.407$ ; treatment 1  $\times$  treatment 2:  $F_{(1,16)} = 0.329$ ,  $p = 0.574$ ,  $BF_{(incl)} = 0.543$ . Female:  $N = 6$  in each group. Treatment 1:  $F_{(1,20)} = 0.121$ ,  $p = 0.732$ ,  $BF_{(incl)} = 0.391$ ; treatment 2:  $F_{(1,20)} = 0.017$ ,  $p = 0.897$ ,  $BF_{(incl)} = 0.375$ ; treatment 1  $\times$  treatment 2:  $F_{(1,20)} = 0.238$ ,  $p = 0.631$ ,  $BF_{(incl)} = 0.498$ . (C) Male:  $N = 6$  in each group. Treatment 1:  $F_{(1,20)} = 0.272$ ,  $p = 0.608$ ,  $BF_{(incl)} = 0.416$ ; treatment 2:  $F_{(1,20)} = 0.758$ ,  $p = 0.394$ ,  $BF_{(incl)} = 0.504$ ; treatment 1  $\times$  treatment 2:  $F_{(1,20)} = 0.017$ ,  $p = 0.897$ ,  $BF_{(incl)} = 0.444$ . Female:  $N = 6$  in each group. Treatment 1:  $F_{(1,20)} = 0.026$ ,  $p = 0.874$ ,  $BF_{(incl)} = 0.377$ ; treatment 2:  $F_{(1,20)} = 1.861$ ,  $p = 0.188$ ,  $BF_{(incl)} = 0.728$ ; treatment 1  $\times$  treatment 2:  $F_{(1,20)} = 1.904$ ,  $p = 0.183$ ,  $BF_{(incl)} = 0.855$ . (D) Male:  $N = 6$  in each group. Treatment 1:  $F_{(1,20)} = 0.794$ ,  $p = 0.384$ ,  $BF_{(incl)} = 0.502$ ; treatment 2:  $F_{(1,20)} = 3.562$ ,  $p = 0.074$ ,  $BF_{(incl)} = 1.404$ ; treatment 1  $\times$  treatment 2:  $F_{(1,20)} = 0.075$ ,  $p = 0.788$ ,  $BF_{(incl)} = 0.477$ . Female:  $N = 6$  in each group. Treatment 1:  $F_{(1,20)} = 6.695e-4$ ,  $p = 0.980$ ,  $BF_{(incl)} = 0.375$ ; treatment 2:  $F_{(1,20)} = 0.453$ ,  $p = 0.508$ ,  $BF_{(incl)} = 0.449$ ; treatment 1  $\times$  treatment 2:  $F_{(1,20)} = 0.089$ ,  $p = 0.768$ ,  $BF_{(incl)} = 0.462$ . Data are presented as mean  $\pm$  SE. Two-way ANOVA and two-way Bayesian ANOVA. Post-hoc comparisons: Tukey. For raw data, please refer to **Figure 6—figure supplement 2—source data 1**. ACC: anterior cingulate cortex; DR: dorsal raphe nucleus; M: male; F: female; 5-HT, serotonin.
