# Supplementary material for: Dorsal raphe nucleus to anterior cingulate cortex 5-HTergic neural circuit modulates consolation and sociability
Source: eLife journal article supplement (doi:10.7554/elife.67638), 2021-06-03
Supplement: supp [file elife_poa_e67638_Figure_5_figure_supplement_1_source_data_1.xls]

## Sheet: Figure 5 figure supplement 1
Allo	Female						Male
		After		Before				After		Before
	1	-1.10672		-0.0128502			1	-1.33723		-0.00544426
	2	-1.66617		0.0102723			2	-1.86097		-0.0586962
	3	-1.04789		0.00802424			3	-0.900269		-0.00869875
	4	-2.16021		-0.012117			4	-0.837341		-0.0090682
	5	-1.78602		-0.0120705			5	-1.63025		-0.00379174
	6	-0.873156		-0.00612502			6	-0.993094		-0.00878903
Sniffing	Female						Male
		After		Before				After		Before
	1	-0.149943		-0.00735464			1	-0.652185		0.00524534
	2	-0.381617		-0.00681273			2	-0.283248		0.00658787
	3	-0.0915238		-0.00453905			3	-0.861593		-0.00367867
	4	0.0687893		0.00624857			4	-1.34314		-0.00138447
	5	-0.298183		-0.0173167			5	-0.788792		-0.00345409
	6	-0.120857		-0.0910096			6	-0.442791		0.0163237
Approching	Female						Male
		After		Before				After		Before
	1	-0.349132		-5.72437e-05			1	-0.545924		0.00691966
	2	-0.342916		-0.0063977			2	-1.01628		-0.000741921
	3	-1.60807		-0.0139483			3	-0.759476		0.00204137
	4	-2.32597		-0.00657729			4	-1.65563		0.00657787
	5	-0.771271		0.0185811			5	-2.14884		0.0638043
	6	-1.51079		-0.0279533			6	-0.836216		-0.0294379

## Sheet: Figure 5 figure supplement 2
DMSO
Allo	Female						Male
		After		Before				After		Before
	1	1.75742		0.00721081			1	2.81992		0.00553653
	2	3.16677		-0.00614614			2	1.78977		0.00761318
	3	2.25312		0.00634006			3	2.53145		0.0063257
	4	1.07375		0.00942994			4	4.59209		0.00469332
	5	3.28884		-0.00255741			5	3.65921		0.00796561
Anti-5-HT
Allo	Female						Male
		After		Before				After		Before
	1	-0.00863727		-0.000827342			1	-0.000931876		0.00352984
	2	-0.0548055		-0.000692466			2	0.0167908		-0.00423611
	3	-0.593182		0.00628445			3	0.00193576		0.00105799
	4	-0.0962055		-0.0012999			4	0.0019043		0.00239535
	5	-0.0401842		-0.00195796			5	-0.0012762		0.00347696
